# Supplementary material for: Predicting bankruptcy of firms using earnings call data and transfer learning
Source: PeerJ Comput Sci. 2023 Jan 4;9:e1134. doi: 10.7717/peerj-cs.1134 (PMC10280182; doi:10.7717/peerj-cs.1134)
Supplement: Supplemental Information 2 [file peerj-cs-09-1134-s002.xlsx]

## Sheet: Sheet1
	filename	title	text	Label
1	100.pdf	Yingli Green Energy Holding Company Limited (NYSE:YGE) Q3 2017 Earnings Conference Call December 19, 2017 8:00 AM ET	Operator Justin Clare - ROTH Capital Partners Hello, ladies and gentlemen, this is Ivan. I will be the operator for this conference call. I would like to welcome everyone to Yingli Green Energy Holding Company Limited’s Third Quarter 2017 Financial Results Conference Call. All lines have been placed on mute to prevent background noise. After today’s presentation, there will be a question-and-answ…	0
2	101.pdf	Navistar International Corporation (NYSE:NAV) Q4 2017 Earnings Conference Call December 19, 2017 9:00 AM ET	Analysts Brian Sponheimer - Gabelli & Co Mike Baudendistel - Stifel Nicolaus Joe O'Dea - Vertical Research Justine Fisher - Goldman Sachs Operator https://seekingalpha.com/article/4132764-navistars-nav-ceo-troy-clarke-on-q4-2017-results-earnings-call-transcript 1/31 12/4/21, 8:16 PM Navistar's (NAV) CEO Troy Clarke on Q4 2017 Results - Earnings Call Transcript | Seeking Alpha Good day, ladies and…	0
3	102.pdf	Colfax Corporation (NYSE:CFX) 2018 Outlook Conference Transcript December 18, 2017 9:00 AM ET	John Inch - Deutsche Bank Jeff Hammond - KeyBanc Capital Markets Joe Giordano - Cowen Brendan Shea - RBC Capital Markets Andrew Kaplowitz - Citigroup Walter Liptak - Seaport Global Josh Pokrzywinski Wolfe Research https://seekingalpha.com/article/4132700-colfax-cfx-management-presents-2018-outlook-conference-transcript 1/26 12/4/21, 8:17 PM Colfax (CFX) Management Presents 2018 Outlook Conference…	0
4	103.pdf	Pinnacle Entertainment Inc. (NASDAQ:PNK) Merger & Acquisition Call December 18, 2017 8:00 AM ET	Analysts Carlo Santarelli - Deutsche Bank Steve Wieczynski - Stifel Nicolaus Chad Beynon - Macquarie Capital Joe Greff - JPMorgan Thomas Allen - Morgan Stanley Patrick Scholes SunTrust Robinson Humphrey https://seekingalpha.com/article/4132697-pinnacle-entertainments-pnk-merger-and-acquisition-call-transcript 1/23 12/4/21, 8:17 PM Pinnacle Entertainment's (PNK) Merger & Acquisition Call - Transcr…	0
5	104.pdf	Colfax Corporation (NYSE:CFX) 2018 Outlook Conference Transcript December 18, 2017 9:00 AM ET	John Inch - Deutsche Bank Jeff Hammond - KeyBanc Capital Markets Joe Giordano - Cowen Brendan Shea - RBC Capital Markets Andrew Kaplowitz - Citigroup Walter Liptak - Seaport Global Josh Pokrzywinski Wolfe Research https://seekingalpha.com/article/4132700-colfax-cfx-management-presents-2018-outlook-conference-transcript 1/26 12/4/21, 8:17 PM Colfax (CFX) Management Presents 2018 Outlook Conference…	0
6	105.pdf	Total System Services, Inc. (NYSE:TSS) Merger & Acquisitions Conference Call December 18, 2017 9:00 AM ET	Darrin Peller - Barclays Capital, Inc. Timothy Willi - Wells Fargo Securities, LLC Ashwin Shirvaikar - Citigroup David Koning - Robert W. Baird & Co George Mihalos - Cowen & Co. LLC. Lara Fourman Goldman Sachs & Co LLC https://seekingalpha.com/article/4132644-total-system-services-tss-announces-agreement-to-acquire-cayan-merger-and-acquisition 1/16 12/4/21, 8:18 PM Total System Services' (TSS) An…	0
7	106.pdf	MamaMancini's Holdings, Inc (NASDAQ:MMMB) Q3 2018 Earnings Conference Call December 18, 2017 9:00 AM ET	Matt Brown - President and Chief Operating Officer Lewis Ochs - Chief Financial Officer Analysts Howard Halpern - Taglich Brothers https://seekingalpha.com/article/4132563-mamamancinis-mmmb-ceo-carl-wolf-on-q3-2018-results-earnings-call-transcript 1/15 12/4/21, 8:18 PM MamaMancini's (MMMB) CEO Carl Wolf on Q3 2018 Results - Earnings Call Transcript | Seeking Alpha Joe Diaz - Lytham Partners Opera…	0
8	107.pdf	Knoll, Inc. (NYSE:KNL) Acquires Muuto A/S Conference Call December 13, 2017 8:00 AM ET	Gregory Burns - Sidoti & Company Steven Ramsey - Thompson Research Group Budd Bugatch - Raymond James & Associates Operator https://seekingalpha.com/article/4132333-knolls-knl-acquires-muuto-s-broker-conference-call-transcript 1/16 12/4/21, 8:19 PM Knoll's (KNL) Acquires Muuto A/S Broker Conference Call (Transcript) | Seeking Alpha Good morning, everyone, and welcome to the Knoll Inc. investor co…	0
9	108.pdf	Xylem, Inc. (NYSE:XYL) Acquires Pure Technologies Ltd Conference Call December 11, 2017 9:00 AM ET	Joseph Giordano - Cowen and Company John Walsh - Vertical Research Partners Robert Graham - BMO Capital Markets Robert Barry - Susquehanna Financial Group Walter Liptak - Seaport Global Securities Brian Lee Goldman Sachs Group https://seekingalpha.com/article/4132332-xylems-xyl-acquires-pure-technologies-ltd-broker-conference-call-transcript 1/21 12/4/21, 8:42 PM Xylem's (XYL) Acquires Pure Techn…	0
10	109.pdf	Oasis Petroleum, Inc. (NASDAQ:OAS) Delaware Basin Acquisition Conference Call December 11, 2017 9:15 AM ET	Brad Heffern - RBC Capital Markets Ronald Mills - Johnson Rice & Co. Gail Nicholson - KLR Group Operator Hello, and welcome to the Oasis Petroleum Investor Call. All participants will be in listen-only mode. [Operator Instructions] After today's presentation, there will be an https://seekingalpha.com/article/4132323-oasis-petroleums-oas-management-presents-on-delaware-basin-acquisition-conference…	0
11	110.pdf	Jabil Inc. (NYSE:JBL) Q1 2018 Earnings Conference Call December 14, 2017 4:30 PM ET	Thejeswi Venkatesh - UBS Ruplu Bhattacharya - Bank of America Merrill Lynch Steven Fox - Cross Research Matt Sheerin - Stifel Amit Daryanani - RBC Capital Jim Suva - Citi Adrienne Colby Deutsche Bank https://seekingalpha.com/article/4132283-jabils-jbl-ceo-mark-mondello-on-q1-2018-results-earnings-call-transcript 1/24 12/4/21, 8:43 PM Jabil's (JBL) CEO Mark Mondello on Q1 2018 Results - Earnings C…	0
12	111.pdf	Iovance Biotherapeutics, Inc. (NASDAQ:IOVA) Iovance Biotherapeutics, Inc. Analyst and Investor Day Conference Call December 13, 2017 9:00 AM ET	Dr. Emese Zsiros - Gyn Oncologist from Roswell Park Cancer Institute Analysts Joe Pantginis - H.C. Wainwright Matthew Gaer - Oppenheimer Biren Amin - Jefferies Madhu Kumar B Riley FBR https://seekingalpha.com/article/4132259-iovance-biotherapeutics-iova-ceo-dr-maria-fardis-hosts-analyst-and-investor-day-transcript 1/57 12/4/21, 8:43 PM Iovance Biotherapeutics' (IOVA) CEO Dr. Maria Fardis Hosts An…	0
13	112.pdf	Rapid7 (NASDAQ:RPD) 2017 Analyst Day Conference December 12, 2017 1:30 PM ET	Hello everybody. Welcome to Boston. Welcome to those of you on the webcast for today’s first Investor and Analyst Day for Rapid7. My name is Jeff Bray, I’m the Vice President of Investor Relations for Rapid7. Thank you all for taking the time today to come and hear our story. Before we get started, of course, I want to give you all an opportunity to take a minute and read our disclaimers. We inve…	0
14	113.pdf	JinkoSolar Holding (NYSE:JKS) Q3 2017 Results Conference Call December 7, 2017 7:30 AM ET	Maheep Mandloi - Credit Suisse Justin Clare - Roth Capital Partners John Segrich - Luminous Brad Meikle - Coker & Palmer Institutional Operator Good day and welcome to the JinkoSolar Third Quarter 2017 Earnings Conference Call https://seekingalpha.com/article/4130474-jinkosolars-jks-ceo-chen-kangping-on-q3-2017-results-earnings-call-transcript 1/16 12/4/21, 8:51 PM JinkoSolar's (JKS) CEO Chen Kan…	0
15	114.pdf	Mitcham Industries, Inc. (NASDAQ:MIND) Q3 2018 Earnings Conference Call December 7, 2017 9:00 AM ET	Operator Greetings and welcome to the Mitcham Industries Third Quarter Fiscal 2018 Conference Call. At this time, all participants are in a listen-only mode. A question-and-answer session will follow the formal presentation. [Operator Instructions] As a reminder, this conference is being recorded. It is now my pleasure to introduce your host, Mark Roberson, Dennard Lascar Investor Relations. Plea…	0
16	115.pdf	Destination Maternity Corporation (NASDAQ:DEST) Q3 2017 Earnings Conference Call December 7, 2017 9:00 AM ET	Operator Dave Dale – Private Investor Good day, ladies and gentlemen. And welcome to the Q3 2017 Destination Maternity Corporation Earnings Conference Call. At this time, all participants are in a listen-only mode. Later we will conduct a question-and-answer session, and instructions will follow at that time. [Operator Instructions] As a reminder this conference call is being recorded I would now…	1
17	116.pdf	Nexeo Solutions, Inc. (NASDAQ:NXEO) Q4 2017 Earnings Conference Call December 7, 2017 10:00 AM ET	Jim Sheehan - SunTrust Nicholas Cecero - Jefferies Andrew Buscaglia - Credit Suisse Operator Hello and welcome to today's webcast. My name is Liz, and I will be your web event specialist today. [Operator Instructions] https://seekingalpha.com/article/4130485-nexeo-solutions-nxeo-ceo-david-bradley-on-q4-2017-results-earnings-call-transcript 1/18 12/4/21, 8:53 PM Nexeo Solutions' (NXEO) CEO David B…	0
18	117.pdf	Input Capital Corp. (OTCPK:INPCF) Q4 2017 Results Earnings Conference Call December 7, 2017 10:30 AM ET	Ken Lester - Lester Asset Operator Good morning, ladies and gentlemen. My name is Matthew and I will be your conference operator today. At this time, I would like to welcome everyone to Input Capital Corp.’s Fiscal 2017 Fourth Quarter and Year-End Conference Call. All lines have been placed on mute to prevent any background noise. After the speakers’ remarks, there will be a question-and-answer s…	0
19	118.pdf	Vail Resorts, Inc. (NYSE:MTN) Q1 2018 Earnings Conference Call December 7, 2017 11:30 AM ET	Analysts Shaun Kelley - Bank of America Ryan Sundby - William Blair Brett Andress - KeyBanc Matthew Brooks - Macquarie O https://seekingalpha.com/article/4130492-vail-resorts-mtn-ceo-rob-katz-on-q1-2018-results-earnings-call-transcript 1/17 12/4/21, 8:55 PM Operator Vail Resorts' (MTN) CEO Rob Katz on Q1 2018 Results - Earnings Call Transcript _ Seeking Alpha Good day, and welcome to the Vail Res…	0
20	119.pdf	Vail Resorts, Inc. (NYSE:MTN) Q1 2018 Earnings Conference Call December 7, 2017 11:30 AM ET	Analysts Shaun Kelley - Bank of America Ryan Sundby - William Blair Brett Andress - KeyBanc Matthew Brooks - Macquarie O https://seekingalpha.com/article/4130492-vail-resorts-mtn-ceo-rob-katz-on-q1-2018-results-earnings-call-transcript 1/17 12/4/21, 8:55 PM Operator Vail Resorts' (MTN) CEO Rob Katz on Q1 2018 Results - Earnings Call Transcript _ Seeking Alpha Good day, and welcome to the Vail Res…	0
21	120.pdf	Methode Electronics, Inc. (NYSE:MEI) Q2 2018 Earnings Conference Call December 7, 2017 11:00 AM ET	Analysts Christopher Van Horn - B Riley, FBR Erin Welcenbach - Robert W. Baird Ryan Sigdahl - Craig Hallum Group https://seekingalpha.com/article/4130493-methode-electronics-mei-ceo-don-duda-on-q2-2018-results-earnings-call-transcript 1/19 12/4/21, 8:56 PM Methode Electronics' (MEI) CEO Don Duda on Q2 2018 Results - Earnings Call Transcript | Seeking Alpha Operator Welcome to Methode Electronics …	0
22	121.pdf	Dollar General Corporation (NYSE:DG) Q3 2017 Earnings Conference Call December 7, 2017 10:00 AM ET	John Garratt - CFO Analysts Alan Rifkin - BTIG Karen Short - Barclays Capital https://seekingalpha.com/article/4130471-dollar-generals-dg-ceo-todd-vasos-on-q3-2017-results-earnings-call-transcript 1/32 12/4/21, 8:57 PM Dollar General's (DG) CEO Todd Vasos on Q3 2017 Results - Earnings Call Transcript _ Seeking Alpha Matthew Boss - JPMorgan Scot Ciccarelli - RBC Capital Markets Peter Keith - Piper…	0
23	122.pdf	Duluth Holdings (NASDAQ:DLTH) Q3 2017 Earnings Conference Call December 7, 2017 9:30 AM ET	Dan Wewer - Raymond James Andrew Burns - D. A. Davidson Jonathan Komp - Robert W. Baird Dylan Carden - William Blair Peter McGoldrick - Stifel Nicolaus Operator https://seekingalpha.com/article/4130446-duluth-holdings-dlth-ceo-stephanie-pugliese-on-q3-2017-results-earnings-call-transcript 1/23 12/4/21, 8:58 PM Operator Duluth Holdings' (DLTH) CEO Stephanie Pugliese on Q3 2017 Results - Earnings C…	0
24	123.pdf	Greif, Inc. (NYSE:GEF) Q4 2017 Results Earnings Conference Call December 7, 2017 8:30 AM ET	Pete Watson - President & CEO Larry Hilsheimer - CFO Analysts Ghansham Panjabi – Robert W. Baird Chris Manuel - Wells Fargo Adam Josephson - KeyBanc G S f https://seekingalpha.com/article/4130445-greifs-gef-ceo-pete-watson-on-q4-2017-results-earnings-call-transcript 1/30 12/4/21, 8:59 PM Greif's (GEF) CEO Pete Watson on Q4 2017 Results - Earnings Call Transcript | Seeking Alpha George Staphos - B…	0
25	124.pdf	Dell Technologies Inc. (DVMT) Q3 2018 Earnings Conference Call December 7, 2017	Franklin Jarman - Goldman Sachs Jeff Harlib - Barclays David Ehrlich - Wells Fargo Thomas Eagan - J.P. Morgan David Phipps - Citi Adam Willinger - Bank of America Shannon Cross Cross Research https://seekingalpha.com/article/4130437-dell-technologies-dvmt-on-q3-2018-results-earnings-call-transcript 1/29 12/4/21, 8:59 PM Dell Technologies (DVMT) on Q3 2018 Results - Earnings Call Transcript _ Seek…	0
26	125.pdf	Comtech Telecommunications Corp. (NASDAQ:CMTL) Q1 2018 Earnings Conference Call December 7, 2017 8:30 AM ET	Fred Kornberg - President & CEO Michael Porcelain - SVP & CFO Michael Galletti - COO Analysts Mark Jordan - Noble Financial https://seekingalpha.com/article/4130434-comtech-telecommunications-cmtl-ceo-fred-kornberg-on-q1-2018-results-earnings-call-transcript 1/23 12/4/21, 9:00 PM Comtech Telecommunications' (CMTL) CEO Fred Kornberg on Q1 2018 Results - Earnings Call Transcript _ Seeking Alpha Jos…	0
27	126.pdf	Star Group LP (NYSE:SGU) Q4 2017 Earnings Conference Call December 7, 2017 11:00 AM ET	Good morning, and welcome to the Star Group Fourth Quarter Earnings Conference Call. [Operator Instructions]. I would now like to turn the conference over to Mr. Steve Goldman, Chief Executive Officer. Please go ahead. Steven Goldman Good morning, and thank you for joining us today. With me is Star's Chief Financial Officer, Rich Ambury. After some brief remarks, Rich will review the fourth quart…	0
28	127.pdf	Ciena Corporation (NYSE:CIEN) Q4 2017 Earnings Conference Call December 7, 2017 8:30 AM ET	Jim Moylan - CFO Steve Alexander - CTO Analysts Patrick Newton - Stifel Nicolaus Simon Leopold - Raymond James https://seekingalpha.com/article/4130391-cienas-cien-ceo-gary-smith-on-q4-2017-results-earnings-call-transcript 1/29 G 12/4/21, 9:03 PM Ciena's (CIEN) CEO Gary Smith on Q4 2017 Results - Earnings Call Transcript _ Seeking Alpha Michael Genovese - MKM Partners George Notter - Jefferies Pa…	0
29	128 (1).pdf	Actua Corporation (NASDAQ:ACTA) Special Meeting of Stockholders Conference Call December 7, 2017 10:00 AM ET	Stockholders to vote on the sale of our interest in VelocityEHS and Bolt Solutions and the sale of FolioDynamix, which together constitute the sale of substantially all of our I am pleased to be joined by other members of the management team in attendants today, Actua’s President, Doug Alexander; Chief Financial Officer, Kirk Morgan; General Counsel, Suzanne Niemeyer; Assistant General Counsel, S…	0
30	128.pdf	Actua Corporation (NASDAQ:ACTA) Special Meeting of Stockholders Conference Call December 7, 2017 10:00 AM ET	Stockholders to vote on the sale of our interest in VelocityEHS and Bolt Solutions and the sale of FolioDynamix, which together constitute the sale of substantially all of our I am pleased to be joined by other members of the management team in attendants today, Actua’s President, Doug Alexander; Chief Financial Officer, Kirk Morgan; General Counsel, Suzanne Niemeyer; Assistant General Counsel, S…	0
31	129.pdf	Daseke, Inc. (NASDAQ:DSKE) Merger & Acquisitions Conference Call December 6, 2017 8:00 AM ET	Jason Seidl - Cowen & Company Steven Dyer - Craig-Hallum Capital Barry Haimes - Sage Asset Management Paul Penney - Northland Capital Markets Steven Ralston - Zacks Investment Research Operator Good day ladies and gentlemen and welcome to the Daseke Inc December 6 2017 https://seekingalpha.com/article/4132326-dasekes-dske-management-on-merger-and-acquisitions-conference-transcript 1/27 12/4/21, 9…	0
32	130.pdf	Vera Bradley, Inc. (NASDAQ:VRA) Q3 2018 Earnings Conference Call December 6, 2017 9:30 AM ET	John Enwright - EVP & CFO Analysts Mark Altschwager - Robert W. Baird Courtney Willson - Cowen & Company https://seekingalpha.com/article/4130178-vera-bradleys-vra-ceo-rob-wallstrom-on-q3-2018-results-earnings-call-transcript 1/14 12/4/21, 9:04 PM Vera Bradley's (VRA) CEO Rob Wallstrom on Q3 2018 Results - Earnings Call Transcript _ Seeking Alpha Austin Hopper - AWH Capital Steve Marotta - C.L. K…	0
33	131.pdf	Brown-Forman Corporation (NYSE:BF.B) Q2 2018 Earnings Conference Call December 6, 2017 10:00 AM ET	Jane Morreau - EVP and CFO Analysts Nik Modi - RBC Capital Markets Vivien Azer - Cowen https://seekingalpha.com/article/4130175-brown-forman-corporations-bf-b-ceo-paul-varga-on-q2-2018-results-earnings-call-transcript 1/28 12/4/21, 9:05 PM Brown-Forman Corporation's (BF.B) CEO Paul Varga on Q2 2018 Results - Earnings Call Transcript _ Seeking Alpha Laurent Grandet - Credit Suisse Judy Hong - Gold…	0
34	132.pdf	Sprint Corporation (S) 45th Annual UBS Global Media and Communications Brokers Conference Call December 5, 2017 10:15 AM ET	John Hodulik Good morning, John. Thanks for having us. I'm John Hodulik, the media and telecom analyst here at UBS, and I am very pleased to announce that our next speaker is Tarek Robbiati, the CFO of Sprint. Tarek, thanks for https://seekingalpha.com/article/4129858-sprint-s-45th-annual-ubs-global-media-and-communications-brokers-conference-transcript 1/16 12/4/21, 9:06 PM Sprint (S) 45th Annua…	1
35	133.pdf	Daseke, Inc. (NASDAQ:DSKE) Merger & Acquisitions Conference Call December 6, 2017 8:00 AM ET	Jason Seidl - Cowen & Company Steven Dyer - Craig-Hallum Capital Barry Haimes - Sage Asset Management Paul Penney - Northland Capital Markets Steven Ralston - Zacks Investment Research Operator Good day ladies and gentlemen and welcome to the Daseke Inc December 6 2017 https://seekingalpha.com/article/4132326-dasekes-dske-management-on-merger-and-acquisitions-conference-transcript 1/27 12/4/21, 9…	0
36	134.pdf	Vera Bradley, Inc. (NASDAQ:VRA) Q3 2018 Earnings Conference Call December 6, 2017 9:30 AM ET	John Enwright - EVP & CFO Analysts Mark Altschwager - Robert W. Baird Courtney Willson - Cowen & Company https://seekingalpha.com/article/4130178-vera-bradleys-vra-ceo-rob-wallstrom-on-q3-2018-results-earnings-call-transcript 1/14 12/4/21, 9:07 PM Vera Bradley's (VRA) CEO Rob Wallstrom on Q3 2018 Results - Earnings Call Transcript _ Seeking Alpha Austin Hopper - AWH Capital Steve Marotta - C.L. K…	1
37	135.pdf	Brown-Forman Corporation (NYSE:BF.B) Q2 2018 Earnings Conference Call December 6, 2017 10:00 AM ET	Jane Morreau - EVP and CFO Analysts Nik Modi - RBC Capital Markets Vivien Azer - Cowen https://seekingalpha.com/article/4130175-brown-forman-corporations-bf-b-ceo-paul-varga-on-q2-2018-results-earnings-call-transcript 1/28 12/4/21, 9:07 PM Brown-Forman Corporation's (BF.B) CEO Paul Varga on Q2 2018 Results - Earnings Call Transcript _ Seeking Alpha Laurent Grandet - Credit Suisse Judy Hong - Gold…	0
38	136.pdf	Cherokee Inc. (CHKE) Q3 2018 Results Earnings Conference Call December 6, 2017 6:00 AM ET	recorded. Dave King - ROTH Capital Thank you, you may begin. Patricia Nir Greetings, and welcome to the Cherokee Global Brands Third Quarter 2018 Earnings Conference Call. [Operator Instructions] As a reminder this conference is being And it is now my pleasure to introduce your host, Ms. Patricia Nir, Investor Relation. https://seekingalpha.com/article/4130169-cherokees-chke-ceo-henry-stupp-on-q3…	0
39	137.pdf	Gilead Sciences, Inc. (NASDAQ:GILD) 37th Nasdaq Investor Conference Call December 5, 2017 3:15 AM ET	Pleased to have with the Kevin Young and Andrew Cheng from Gilead; and Andrew, we’ve got the title flipped, but that’s okay. Andrew can answer all the questions now. So, I thought maybe just to start up, I’ll give you guys the opportunity, if you want make any brief opening remarks and then may can jump right in the Q&A. Kevin Young https://seekingalpha.com/article/4130164-gilead-sciences-gild-ma…	0
40	138.pdf	H&R Block Inc. (NYSE:HRB) Q2 2018 Earnings Conference Call December 6, 2017	Jeffrey Jones - President and Chief Executive Officer Tony Bowen - Chief Financial Officer Analysts Anjeneya Singh - Credit Suisse Kartik Mehta - Northcoast Research https://seekingalpha.com/article/4130161-h-and-r-blocks-hrb-ceo-jeffrey-jones-on-q2-2018-results-earnings-call-transcript 1/25 12/4/21, 9:09 PM H&R Block's (HRB) CEO Jeffrey Jones on Q2 2018 Results - Earnings Call Transcript | Seeki…	0
41	139.pdf	American Eagle Outfitters Inc. (NYSE:AEO) Q3 2017 Earnings Conference Call December 6, 2017 9:00 AM ET	Chad Kessler - Global Brand President, AE Jen Foyle - Global Brand President, Aerie Robert Madore - Chief Financial Officer Judy Meehan - Vice President, Investor Relations Analysts https://seekingalpha.com/article/4130141-american-eagle-outfitters-aeo-ceo-jay-schottenstein-on-q3-2017-results-earnings-call 1/25 12/4/21, 9:12 PM American Eagle Outfitters' (AEO) CEO, Jay Schottenstein on Q3 2017 Re…	0
42	140.pdf	Lee Enterprises, Incorporated (NASDAQ:LEE) Q4 2017 Earnings Conference Call December 6, 2017 10:00 AM ET	Operator Welcome to the Lee Enterprises 2017 Fourth Quarter Webcast and Conference Call. The call is being recorded, and will be available for replay beginning later this morning at lee.net. At the close of the planned remarks, there will be an opportunity for questions. Several analysts have been invited to participate. Also participants accessing this call by webcast may submit written question…	1
43	141.pdf	John Wiley & Sons, Inc. (NYSE:JW.A) Q2 2018 Earnings Conference Call December 6, 2017 10:00 AM ET Executives	John Kritzmacher - CFO & EVP, Technology and Operations Analysts Dan Moore - CJS Securities Drew Crum - Stifel Nicolaus https://seekingalpha.com/article/4130100-john-wiley-and-sons-jw-ceo-brian-napack-on-q2-2018-results-earnings-call-transcript 1/15 12/4/21, 9:13 PM John Wiley & Sons' (JW.A) CEO Brian Napack on Q2 2018 Results - Earnings Call Transcript _ Seeking Alpha Drew Crum Stifel Nicolaus N…	1
44	142.pdf	KLX, Inc. (NASDAQ:KLXI) Q3 2017 Earnings Conference Call December 6, 2017 9:00 AM ET	Sheila Kahyaoglu - Jefferies Richard Safran - Buckingham Research Michael Ciarmoli - SunTrust Operator Good morning. My name is Candace Gribbin and I will be your conference facilitator today. At this time, I would like to welcome everyone to the KLX Third Quarter 2017 Earnings Call. All audience lines have been placed on mute to prevent any background noise After the speaker's remarks there will…	0
45	143.pdf	IEC Electronics Corp (NASDAQ:IEC) Q4 2017 Earnings Conference Call December 6, 2017 10:00 AM ET	Nehal Chokshi - Maxim Group LLC Alex Gates - Clayton Partners LLC Allan Lyons - Vestal Venture Capital. Operator Greetings and welcome to the IEC Electronics Fourth Quarter and Year-End 2017 Earnings Conference Call. At this time, all participants are in a listen-only mode. A brief https://seekingalpha.com/article/4130097-iec-electronics-iec-ceo-jeffrey-schlarbaum-on-q4-2017-results-earnings-call…	0
46	144.pdf	Layne Christensen Company (NASDAQ:LAYN) Q3 2018 Results Earnings Conference Call December 6, 2017 9:00 AM ET	Jon Braatz - Kansas City Capital Jose Garza - Gabelli & Company Gentry Klein - Cetus Operator Greetings, and welcome to the Layne Christensen Third Quarter 2018 Conference Call. At this time, all participants are in a listen-only mode. A question-and-answer session https://seekingalpha.com/article/4130094-layne-christensens-layn-ceo-michael-caliel-on-q3-2018-results-earnings-call-transcript 1/25 …	0
47	145.pdf	Secureworks Corp. (NASDAQ:SCWX) Q3 2018 Results Earnings Conference Call December 6, 2017 8:00 AM ET	Wayne Jackson - CFO Analysts Sterling Auty - JP Morgan Gabriela Borges - Goldman Sachs https://seekingalpha.com/article/4130092-secureworks-scwx-ceo-michael-cote-on-q3-2018-results-earnings-call-transcript 1/27 12/4/21, 9:14 PM Secureworks' (SCWX) CEO Michael Cote on Q3 2018 Results - Earnings Call Transcript _ Seeking Alpha Jonathan Ho - William Blair Saket Kalia - Barclays Capital Walter Pritch…	0
48	146.pdf	Secureworks Corp. (NASDAQ:SCWX) Q3 2018 Results Earnings Conference Call December 6, 2017 8:00 AM ET	Wayne Jackson - CFO Analysts Sterling Auty - JP Morgan Gabriela Borges - Goldman Sachs https://seekingalpha.com/article/4130092-secureworks-scwx-ceo-michael-cote-on-q3-2018-results-earnings-call-transcript 1/27 12/4/21, 9:15 PM Secureworks' (SCWX) CEO Michael Cote on Q3 2018 Results - Earnings Call Transcript _ Seeking Alpha Jonathan Ho - William Blair Saket Kalia - Barclays Capital Walter Pritch…	0
49	147.pdf	China Zenix Auto International (ZX) Q3 2017 Earnings Conference Call December 6, 2017 8:00 AM ET	Analysts Operator Greetings and welcome to China Zenix Third Quarter 2017 Financial Results. At this time, all participants are in a listen-only mode. A brief question-and-answer session will follow the formal presentation. [Operator Instructions] I would now like to turn the conference over to your host, Kevin Theiss. Kevin Theiss https://seekingalpha.com/article/4130081-china-zenix-auto-interna…	0
50	148.pdf	Hudson's Bay Co (OTCPK:HBAYF) Q3 2017 Earnings Conference Call December 6, 2017 8:30 AM ET	Sabahat Khan - RBC Capital Markets Mark Petrie - CIBC Capital Markets Operator Good day, ladies and gentlemen, and welcome to the Hudson's Bay Company Third Quarter 2017 Earnings Conference Call. [Operator Instructions]. I would now like to turn the conference over to Elliot Grundmanis. Sir, you may begin. https://seekingalpha.com/article/4130066-hudsons-bays-hbayf-ceo-richard-baker-on-q3-2017-re…	1
51	149.pdf	Fred's, Inc. (NASDAQ:FRED) Q3 2017 Results Earnings Conference Call December 6, 2017 8:00 AM ET	Operator Gabriella Carbone - Deutsche Bank Andrew Wolf - Loop Capital Markets Good morning, and welcome to the Fred’s Inc. Third Quarter 2017 Earnings Conference Call. All participants will be in listen-only mode. [Operator Instructions] After today's presentation, there will be an opportunity to ask questions. [Operator Instructions] Please note, this event is being recorded. I would now like to…	1
52	150.pdf	Micron Technology Inc. (NASDAQ:MU) NASDAQ 37th Investor Conference December 6, 2017 3:45 AM ET	Analysts Joseph Moore Ernie Maddock Good morning. Joseph Moore https://seekingalpha.com/article/4129990-micron-technologys-mu-management-presents-nasdaq-37th-investor-conference-transcript 1/16 12/4/21, 9:17 PM Micron Technology's (MU) Management Presents at NASDAQ 37th Investor Conference (Transcript) _ Seeking Alpha Welcome. So maybe we could just start with some big picture questions and then …	0
53	151.pdf	21Vianet Group (NASDAQ:VNET) Q3 2017 Earnings Conference Call December 5, 2017 8:00 PM ET	Operator Good morning, and good evening, ladies and gentlemen. Thank you and welcome to 21Vianet Group’s Third Quarter 2017 Earnings Conference Call. At this time, all participants are in a listen-only mode. We’ll be hosting a question-and-answer session after management’s prepared remarks. https://seekingalpha.com/article/4129927-21vianet-groups-vnet-ceo-steve-zhenqing-zhang-on-q3-2017-results-e…	0
54	152.pdf	Dave & Buster’s Entertainment, Inc. (NASDAQ:PLAY) Q3 2017 Earnings Conference Call December 5, 2017 5:00 PM ET	Brian Jenkins - CFO Analysts Jake Bartlett - SunTrust Jeff Farmer - Wells Fargo https://seekingalpha.com/article/4129922-dave-and-busters-entertainments-play-ceo-steve-king-on-q3-2017-results-earnings-call 1/29 12/4/21, 9:18 PM Dave & Buster's Entertainment's (PLAY) CEO Steve King on Q3 2017 Results - Earnings Call Transcript | Seeking Alpha Sharon Zackfia - William Blair Joshua Long - Piper Jaff…	0
55	153.pdf	Restoration Hardware Holdings, Inc. (NYSE:RH) Q3 2017 Earnings Conference Call December 5, 2017 5:00 PM ET	Analysts Steven Forbes - Guggenheim Securities Oliver Chen - Cowen & Company Karen Boone - Co-President, CFO & Chief Administrative Officer https://seekingalpha.com/article/4129917-restoration-hardware-holdings-rh-ceo-gary-friedman-on-q3-2017-results-earnings-call 1/31 12/4/21, 9:19 PM Restoration Hardware Holdings' (RH) CEO Gary Friedman on Q3 2017 Results - Earnings Call Transcript _ Seeking Al…	0
56	154.pdf	Restoration Hardware Holdings, Inc. (NYSE:RH) Q3 2017 Earnings Conference Call December 5, 2017 5:00 PM ET	Analysts Steven Forbes - Guggenheim Securities Oliver Chen - Cowen & Company Karen Boone - Co-President, CFO & Chief Administrative Officer https://seekingalpha.com/article/4129917-restoration-hardware-holdings-rh-ceo-gary-friedman-on-q3-2017-results-earnings-call 1/31 12/4/21, 9:19 PM Restoration Hardware Holdings' (RH) CEO Gary Friedman on Q3 2017 Results - Earnings Call Transcript _ Seeking Al…	0
57	155.pdf	Bank of America Corporation (NYSE:BAC) Goldman Sachs U.S. Financial Services Conference December 5, 2017 10:20 AM ET	has spoken at this conference every year since he was appointed to his current role, which was eight years ago. How times flies? I think it is really fair to say that Brian has overseen one of the most far-reaching and successful restructurings of any of the banks that we cover. And we think Bank of America is ideally positioned to deliver both positive operating leverage as well as a significant…	0
58	156.pdf	AutoZone, Inc. (NYSE:AZO) Q1 2018 Results Earnings Conference Call December 5, 2017 10:00 AM ET	Executives Technology and ALLDATA Analysts Alan Rifkin - BTIG Christopher Horvers - JPMorgan Matt Fassler - Goldman Sachs https://seekingalpha.com/article/4129900-autozones-azo-ceo-bill-rhodes-on-q1-2018-results-earnings-call-transcript 1/31 12/4/21, 9:21 PM AutoZone's (AZO) CEO Bill Rhodes on Q1 2018 Results - Earnings Call Transcript _ Seeking Alpha Joshua Siber - Morgan Stanley Seth Sigman - C…	0
59	157.pdf	AutoZone, Inc. (NYSE:AZO) Q1 2018 Results Earnings Conference Call December 5, 2017 10:00 AM ET	Executives Technology and ALLDATA Analysts Alan Rifkin - BTIG Christopher Horvers - JPMorgan Matt Fassler - Goldman Sachs https://seekingalpha.com/article/4129900-autozones-azo-ceo-bill-rhodes-on-q1-2018-results-earnings-call-transcript 1/31 12/4/21, 9:21 PM AutoZone's (AZO) CEO Bill Rhodes on Q1 2018 Results - Earnings Call Transcript _ Seeking Alpha Joshua Siber - Morgan Stanley Seth Sigman - C…	0
60	158.pdf	HealthEquity Inc. (NASDAQ:HQY) Q3 2018 Earnings Conference Call December 5, 2017 5:00 PM ET	Steve Neeleman - Founder, Vice Chairman Darcy Mott - Vice President and Chief Financial Officer Analysts Lisa Gill - JPMorgan https://seekingalpha.com/article/4129899-healthequitys-hqy-ceo-jon-kessler-on-q3-2018-results-earnings-call-transcript 1/26 12/4/21, 9:22 PM HealthEquity's (HQY) CEO Jon Kessler on Q3 2018 Results - Earnings Call Transcript _ Seeking Alpha Greg Peters - Raymond James Sandy…	0
61	159.pdf	IDT Corporation (NYSE:IDT) Q1 2018 Earnings Conference Call December 5, 2017	financial and operational results for the three-months period ended October 31, 2017. During prepared remarks by IDT's Chief Executive Officer, Shmuel Jonas, all participants will be in listen-only mode. [Operator Instructions] After the prepared remarks, Marcelo Fischer, IDT's Senior Vice President, Finance and Chief Financial Officer of IDT Telecom will join Mr. Jonas for a Q&A. [Operator Instr…	0
62	160.pdf	Sprint Corporation (S) 45th Annual UBS Global Media and Communications Brokers Conference Call December 5, 2017 10:15 AM ET	John Hodulik Good morning, John. Thanks for having us. I'm John Hodulik, the media and telecom analyst here at UBS, and I am very pleased to announce that our next speaker is Tarek Robbiati, the CFO of Sprint. Tarek, thanks for https://seekingalpha.com/article/4129858-sprint-s-45th-annual-ubs-global-media-and-communications-brokers-conference-transcript 1/16 12/4/21, 9:23 PM Sprint (S) 45th Annua…	1
63	161.pdf	AT&T Inc. (NYSE:T) UBS Global Media and Communications Brokers Conference December 5, 2017 1:00 PM ET	Okay. Thank you all for joining us. My name is Q - John Hodulik. I'm the Media and Telecom analyst here at UBS, and I'm pleased to announce that our next keynote one speaker is A - John Stephens, the CFO of AT&T. John, thanks for being here. Thanks for having me, John. I appreciate it, and it's a great opportunity. I want to start off by saying - making my team happy back home that some of the th…	0
64	162.pdf	Wells Fargo & Co. (NYSE:WFC) Goldman Sachs US Financial Services Conference December 5, 2017 8:20 AM ET	welcome Tim Sloan, who is CEO of Wells Fargo. I think Tim is very well known to many of you here given his study and track record at Wells Fargo. He's run many of Wells most important businesses and was most recently COO before taking on the CEO position just over a year ago. Tim is going to give a brief presentation. And then he's going to join me for a fireside chat. So Tim, thank you very much…	0
65	163.pdf	International Business Machines Corporation (NYSE:IBM) 2017 Wells Fargo Tech Summit 2017 December 5, 2017 1:00 PM ET	Hybrid Cloud and Director of IBM Research. Arvind, thank you for coming out here and like I was saying before, I am excited for this session, because we get to talk about not just what’s going on right now, but all the fun things, going forward. Arvind Krishna Phil Winslow Well, it's my pleasure to be here Phil. I mean fun to talk about all these topics. Yes So I guess in the context of just to k…	0
66	164.pdf	Independent Bank Corporation (NASDAQ:IBCP) Independent Bank Corporation Acquisition of TCSB Bancorp, Inc December 5, 2017 11:00 AM ET	Analysts Matthew Forgotson - Sandler O'Neill Kevin Reevey - D.A. Davidson John Rodis - FIG Partners Louis Feldman - Wells Capital Management Operator https://seekingalpha.com/article/4129886-independent-bank-corps-ibcp-independent-bank-corporation-acquisition-of-tcsb-bancorp-inc 1/19 12/4/21, 9:27 PM Independent Bank Corp's (IBCP) Independent Bank Corporation Acquisition of TCSB Bancorp, Inc (Tra…	0
67	165.pdf	Verizon Communications Inc. (NYSE:VZ) 45th Annual UBS Global Media & Communications Conference December 5, 2017 8:00 AM ET	Matthew Ellis Good morning, everyone. John Hodulik Okay, good morning everyone. I'm John Hodulik, the Media and Telecom Analyst here at UBS. And welcome to the second day of our Global Media and Telecom Conference. I'm very pleased to welcome Matt Ellis, the CFO of Verizon, as one of our morning keynote speakers. Matt, thanks for being here. https://seekingalpha.com/article/4129887-verizon-commun…	0
68	166.pdf	BJ's Restaurants, Inc. (NYSE:BNED) Q2 2018 Results Conference Call December 5, 2017 10:00 AM ET	Patrick Maloney - COO and President, Barnes & Noble College Kanuj Malhotra - SVP of Strategy & COO of Digital Education Barry Brover - CFO Analysts https://seekingalpha.com/article/4129847-barnes-and-noble-education-bned-ceo-mike-huseby-on-q2-2018-results-earnings-call-transcript 1/20 12/4/21, 9:30 PM Barnes & Noble Education (BNED) CEO Mike Huseby on Q2 2018 Results - Earnings Call Transcript _ …	1
69	167.pdf	Francesca's Holdings Corp. (NASDAQ:FRAN) Q3 2017 Earnings Conference Call December 5, 2017 8:30 AM ET	Janet Kloppenburg - JJK Research Operator Good day, and welcome to the Francesca's Holdings Corporation Third Quarter 2017 Earnings Conference Call. Today's call is being recorded. At this time, I'd like to turn the call over to Kelly Dilts, CFO. Please go ahead. Kelly Dilts https://seekingalpha.com/article/4129837-francescas-holdings-fran-ceo-steve-lawrence-on-q3-2017-results-earnings-call-trans…	1
70	168.pdf	Lands' End, Inc. (NASDAQ:LE) Q3 2017 Earnings Conference Call December 5, 2017 8:30 AM ET	Jerome Griffith - Chief Executive Officer Jim Gooch - Chief Operating Officer, Chief Financial Officer Bernard McCracken - Chief Accounting Officer, Vice President Alex Fuhrman - Craig-Hallum Group https://seekingalpha.com/article/4129832-lands-end-le-ceo-jerome-griffith-on-q3-2017-results-earnings-call-transcript 1/14 12/4/21, 9:34 PM Lands' End (LE) CEO Jerome Griffith on Q3 2017 Results - Earn…	1
71	169.pdf	TTM Technologies, Inc. (NASDAQ:TTMI) TTM Technologies, Inc. to Acquire Anaren, Inc. Conference Call December 4, 2017 8:03 AM ET	Steven Fox - Cross Research Matt Sheerin - Stifel Woo Jin Ho - Bloomberg Intelligence Rob Jost - Invesco Operator https://seekingalpha.com/article/4129827-ttm-ttmi-ttm-technologies-inc-to-acquire-anaren-inc-conference-transcript 1/18 12/4/21, 9:35 PM TTM (TTMI) TTM Technologies, Inc. to Acquire Anaren, Inc. Conference (Transcript) _ Seeking Alpha Welcome to the TTM Technologies Acquisition of Ana…	1
72	170.pdf	HD Supply (NASDAQ:HDS) Q3 2017 Earnings Conference Call November 5, 2017 8:00 AM ET	Ryan Merkel - William Blair Luke Junk - Robert W. Baird & Co. Andrew Obin - Bank of America Merrill Lynch Deane Dray - RBC Capital Markets Robert Barry - Susquehanna Financial Group Keith Hughes SunTrust Robinson Humphrey https://seekingalpha.com/article/4129773-hd-supplys-hds-ceo-joe-deangelo-on-q3-2017-results-earnings-call-transcript 1/29 12/4/21, 9:36 PM HD Supply's (HDS) CEO Joe DeAngelo on …	0
73	171.pdf	J. Jill Group, Inc. (NYSE:JILL) Q3 2017 Earnings Conference Call December 5, 2017 8:00 AM ET	Kimberly Greenberger - Morgan Stanley Brian Tunick - RBC Capital Markets Ike Boruchow - Wells Fargo Securities LLC Pamela Quintiliano - SunTrust Robinson Humphrey Inc Operator https://seekingalpha.com/article/4129768-j-jill-groups-jill-ceo-paula-bennett-on-q3-2017-results-earnings-call-transcript 1/21 12/4/21, 9:36 PM J. Jill Group's (JILL) CEO Paula Bennett on Q3 2017 Results - Earnings Call Tra…	1
74	172.pdf	G-III Apparel Group, Ltd. (NASDAQ:GIII) Q3 2018 Results Earnings Conference Call December 5, 2017 8:30 AM ET	Analysts Ed Yruma - KeyBanc Capital Chethan Mallela - Barclays Erinn Murphy - Piper Jaffray John Kernan - Cowen https://seekingalpha.com/article/4129766-g-iiis-giii-ceo-morris-goldfarb-on-q3-2018-results-earnings-call-transcript 1/21 12/4/21, 9:37 PM G-III's (GIII) CEO Morris Goldfarb on Q3 2018 Results - Earnings Call Transcript _ Seeking Alpha Eric Tracy - Buckingham Research Peter McGoldrick -…	0
75	173.pdf	Five Below, Inc. (NASDAQ:FIVE) Q3 2017 Results Earnings Conference Call November 30, 2017 4:30 PM ET	Ken Bull - CFO and Treasurer Analysts Scot Ciccarelli - RBC Capital Markets John Heinbockel - Guggenheim Securities https://seekingalpha.com/article/4128868-five-belows-five-ceo-joel-anderson-on-q3-2017-results-earnings-call-transcript 1/24 12/4/21, 9:37 PM Five Below's (FIVE) CEO Joel Anderson on Q3 2017 Results - Earnings Call Transcript | Seeking Alpha Jeremy Hamblin - Dougherty & Company Dan …	1
76	174.pdf	Universal Technical Institute (NYSE:UTI) Q4 2017 Results Earnings Conference Call November 30, 2017 4:30 PM ET	Bryce Peterson - CFO Analysts Peter Appert - Piper Jaffray Barry Lucas - Gabelli & Company https://seekingalpha.com/article/4128867-universal-technical-institutes-uti-ceo-kimberly-mcwaters-on-q4-2017-results-earnings-call 1/20 12/4/21, 9:38 PM Universal Technical Institute's (UTI) CEO Kimberly McWaters on Q4 2017 Results - Earnings Call Transcript _ Seeking Alpha Justyn Putnam - Talanta Investmen…	0
77	175.pdf	Toronto-Dominion Bank (NYSE:TD) Q4 2017 Results Earnings Conference Call November 30, 2017 1:30 PM ET	Riaz Ahmed - CFO Mark Chauvin - CRO Teri Currie - Group Head, Canadian Personal Banking Greg Braca - Group Head, U.S. Retail https://seekingalpha.com/article/4128861-toronto-dominion-banks-td-ceo-bharat-masrani-on-q4-2017-results-earnings-call-transcript 1/29 12/4/21, 9:39 PM Toronto-Dominion Bank's (TD) CEO Bharat Masrani on Q4 2017 Results - Earnings Call Transcript _ Seeking Alpha Bob Dorrance…	0
78	176.pdf	American Software, Inc. (NASDAQ:AMSWA) Q2 2018 Results Earnings Conference Call November 30, 2017 5:00 PM ET	Analysts Matthew Galinko - Sidoti Kevin Liu - B. Riley FBR Operator Good day everyone and welcome to today's American Software second quarter of fiscal year 2018 preliminary earnings results. At this time, all participants are in a listen-only https://seekingalpha.com/article/4128860-american-software-amswa-q2-2018-results-earnings-call-transcript 1/13 12/4/21, 9:39 PM y p y g American Software (…	1
79	177.pdf	The Kroger Co. (NYSE:KR) Q3 2017 Earnings Conference Call November 30, 2017 10:00 AM ET	Mike Schlotman - EVP & CFO Analysts Karen Short - Barclays John Heinbockel - Guggenheim Securities https://seekingalpha.com/article/4128859-krogers-kr-ceo-rodney-mcmullen-on-q3-2017-results-earnings-call-transcript 1/28 12/4/21, 9:40 PM Kroger's (KR) CEO Rodney McMullen on Q3 2017 Results - Earnings Call Transcript _ Seeking Alpha Shane Higgins - Deutsche Bank Edward Kelly - Wells Fargo Ken Goldm…	0
80	178.pdf	Golar LNG Partners LP (NASDAQ:GMLP) Q3 2017 Earnings Conference Call November 30, 2017 11:30 AM ET	John Chappell - Evercore ISI Ben Nolan - Stifel Nicolaus Fotis Giannakoulis - Morgan Stanley Randall Giveans - Jefferies Ken Hoexter - Merrill Lynch Sunil Sibal Seaport Global Securities https://seekingalpha.com/article/4128854-golar-lng-partners-gmlp-ceo-graham-robjohns-on-q3-2017-results-earnings-call-transcript 1/18 12/4/21, 9:41 PM Golar LNG Partners' (GMLP) CEO Graham Robjohns on Q3 2017 Res…	0
81	179.pdf	The Descartes Systems Group Inc. (NASDAQ:DSGX) Q3 2018 Results Earnings Conference Call November 29, 2017 5:00 PM ET	Allan Brett - CFO Analysts Steven Li - Raymond James Brian Essex - Morgan Stanley https://seekingalpha.com/article/4128851-descartes-systems-groups-dsgx-ceo-ed-ryan-on-q3-2018-results-earnings-call-transcript 1/30 12/4/21, 9:41 PM The Descartes Systems Group's (DSGX) CEO Ed Ryan on Q3 2018 Results - Earnings Call Transcript _ Seeking Alpha Paul Treiber - RBC Phillip Huang - Barclays Matt Pfau - W…	0
82	180.pdf	The Descartes Systems Group Inc. (NASDAQ:DSGX) Q3 2018 Results Earnings Conference Call November 29, 2017 5:00 PM ET	Allan Brett - CFO Analysts Steven Li - Raymond James Brian Essex - Morgan Stanley https://seekingalpha.com/article/4128851-descartes-systems-groups-dsgx-ceo-ed-ryan-on-q3-2018-results-earnings-call-transcript 1/30 12/4/21, 9:42 PM The Descartes Systems Group's (DSGX) CEO Ed Ryan on Q3 2018 Results - Earnings Call Transcript _ Seeking Alpha Paul Treiber - RBC Phillip Huang - Barclays Matt Pfau - W…	0
83	181.pdf	China Distance Education Holdings Limited (NYSE:DL) Q4 2017 Results Earnings Conference Call November 29, 2017 8:00 AM ET	Operator Ladies and gentlemen, thank you for standing by, and welcome to CDEL Quarter Four Fiscal Year 2017 Earnings Conference Call. [Operator Instructions] Now I would like to hand the conference over to company’s Investor Relations representative. Over to you, sir. Unidentified Company Representative https://seekingalpha.com/article/4128850-china-distance-education-holdings-dl-ceo-zhengdong-zh…	0
84	182.pdf	China Distance Education Holdings Limited (NYSE:DL) Q4 2017 Results Earnings Conference Call November 29, 2017 8:00 AM ET	Operator Ladies and gentlemen, thank you for standing by, and welcome to CDEL Quarter Four Fiscal Year 2017 Earnings Conference Call. [Operator Instructions] Now I would like to hand the conference over to company’s Investor Relations representative. Over to you, sir. Unidentified Company Representative https://seekingalpha.com/article/4128850-china-distance-education-holdings-dl-ceo-zhengdong-zh…	0
85	183.pdf	Celgene Corp. (NASDAQ:CELG) Evercore ISI Biopharma Catalyst/Deep Dive Conference November 30, 2017 11:00 AM ET	Scott Smith No, we're not discussing at this point in time. Unidentified Company Representative We have Scott Smith and Patrick Flanigan from Celgene joining us. And I'm extremely excited because they told me they'll discuss 2025 data with us today. So let's start right Okay great. No, no, just to kick things off. Maybe some brief opening comments then we'll dig right into it https://seekingalpha…	0
86	184.pdf	Jack in the Box Inc. (NASDAQ:JACK) Q4 2017 Results Earnings Conference Call November 30, 2017 11:30 AM ET	Jerry Rebel - EVP and CFO Analysts Dennis Geiger - UBS Brian Bittner - Oppenheimer https://seekingalpha.com/article/4128843-jack-in-boxs-jack-ceo-lenny-comma-on-q4-2017-results-earnings-call-transcript 1/28 12/4/21, 9:45 PM Jack in the Box's (JACK) CEO Lenny Comma on Q4 2017 Results - Earnings Call Transcript _ Seeking Alpha John Glass - Morgan Stanley Chris O’Cull - Stifel Gregory Francfort - Ba…	1
87	185.pdf	PotashCorp Corporation of Saskatchewan Inc. (POT) Citi Basic Materials Conference November 29, 2017 8:45 AM ET	what I wanted to speak today is firstly a bit of an update on markets and I do focus on the Potash markets but I'll also speak a bit of nitrogen and phosphate. I'll give you a bit of a perspective that we have where we think directionally things will go, and also like to give you a bit of a, a very brief update on the merger between PotashCorp and Agrium and what we think will happen in the next …	0
88	186.pdf	Photronics, Inc. (NASDAQ:PLAB) Q4 2017 Results Conference Call November 29, 2017 8:30 AM ET	Tom Diffely - D.A. Davidson Edwin Mok - Needham & Company Patrick Ho - Stifel Nicolas Operator Ladies and gentlemen, thank you for standing by. Welcome to the Photronics Fourth Quarter Earnings Call. At this time, all participants are in a listen-only mode. Later, we https://seekingalpha.com/article/4128448-photronics-plab-ceo-peter-kirlin-on-q4-2017-results-earnings-call-transcript 1/16 12/4/21,…	1
89	187.pdf	Yintech Investment Holdings (NASDAQ:YIN) Q3 2017 Earnings Conference Call November 29, 2017 8:00 AM ET	Tian Hou - T.H. Capital James Wang - China International Corp Operator Good evening. And welcome to the Yintech Third Quarter 2017 Earnings Conference Call. All participants will be in listen-only mode [Operator Instructions]. After today’s presentation, there will be an opportunity to ask questions [Operator Instructions]. Please note this event is been recorded https://seekingalpha.com/article/…	0
90	188.pdf	Intuit, Inc. (NASDAQ:INTU) Q1 2018 Earnings Conference Call November 20, 2017 4:30 PM ET	Neil Williams - Chief Financial Officer Michelle Clatterbuck - Incoming Chief Financial Officer Analysts Brent Thill - Jefferies Kash Rangan - Bank of America/Merrill Lynch https://seekingalpha.com/article/4126657-intuits-intu-ceo-brad-smith-on-q1-2018-results-earnings-call-transcript 1/32 12/5/21, 8:13 PM Intuit's (INTU) CEO Brad Smith on Q1 2018 Results - Earnings Call Transcript _ Seeking Alph…	0
91	189.pdf	Cubic Corporation (NYSE:CUB) Q4 2017 Earnings Conference Call November 20, 2017 4:30 PM ET	Ken Herbert - Canaccord Genuity Mark Strouse - JP Morgan Chase Brian Ruttenbur - Drexel Hamilton Operator https://seekingalpha.com/article/4126655-cubic-corporations-cub-ceo-brad-feldmann-on-q4-2017-results-earnings-call-transcript 1/22 12/5/21, 8:14 PM Cubic Corporation's (CUB) CEO Brad Feldmann on Q4 2017 Results - Earnings Call Transcript _ Seeking Alpha Ladies and gentlemen, welcome to Cubic …	0
92	190.pdf	Agilent Technologies, Inc. (NYSE:A) Q4 2017 Results Earnings Conference Call November 20, 2017 4:30 PM ET	Mike McMullen - President and CEO Didier Hirsch - SVP and CFO Patrick Kaltenbach - President, Life Sciences and Applied Markets Group Jacob Thaysen - President, Diagnostics and Genomics Group Mark Doak - President, CrossLab Group https://seekingalpha.com/article/4126654-agilent-technologies-ceo-mike-mcmullen-on-q4-2017-results-earnings-call-transcript 1/33 12/5/21, 8:14 PM Agilent Technologies' (…	0
93	191.pdf	Enanta Pharmaceuticals, Inc. (NASDAQ:ENTA) Q4 2017 Earnings Conference Call November 20, 2017 4:30 PM ET	Paul Mellett - Chief Financial Officer Analysts Jessica Fye - J.P. Morgan Brian Abrahams - RBC Capital Markets https://seekingalpha.com/article/4126650-enanta-pharmaceuticals-enta-ceo-jay-luly-on-fiscal-q4-2017-results-earnings-call-transcript 1/15 12/5/21, 8:15 PM Enanta Pharmaceuticals' (ENTA) CEO Jay Luly on Fiscal Q4 2017 Results - Earnings Call Transcript _ Seeking Alpha Liisa Bayko - JMP Se…	1
94	192.pdf	Alto Networks (NASDAQ:PANW) Q1 2018 Results Earnings Conference Call November 20, 2017 4:30 PM ET	Steffan Tomlinson - CFO Mark Anderson - President Kathy Bonanno - New CFO Analysts https://seekingalpha.com/article/4126649-palo-alto-networks-panw-ceo-mark-mclaughlin-on-q1-2018-results-earnings-call-transcript 1/34 12/5/21, 8:15 PM Palo Alto Networks' (PANW) CEO Mark McLaughlin on Q1 2018 Results - Earnings Call Transcript _ Seeking Alpha Philip Winslow - Wells Fargo Securities Pierre Ferragu -…	0
95	193.pdf	Urban Outfitters, Inc. (NASDAQ:URBN) Q3 2018 Earnings Conference Call November 20, 2017 5:00 PM ET	Frank Conforti - Chief Financial Officer Sheila Harrington - President, Free People brand Trish Donnelly - Global Chief Executive Officer, Urban Outfitters Group David McCreight - President, URBN and Chief Executive Officer, Anthropologie Group Richard Hayne - Chief Executive Officer https://seekingalpha.com/article/4126648-urban-outfitters-urbn-ceo-richard-hayne-on-q3-2018-results-earnings-call-…	0
96	194.pdf	FalconStor Software, Inc. (OTCQB:FALC) Q3 2017 Results Earnings Conference Call November 20, 2017 4:30 PM ET	Operator Good afternoon and thank you for joining us to discuss FalconStor Software's Q3, 2017 Earnings Call. Todd Brooks, FalconStor's Chief Executive Officer; and Patrick McClain, Chief Financial Officer will discuss the company's results and activities and we'll then open the call to your questions. https://seekingalpha.com/article/4126633-falconstor-softwares-falc-ceo-todd-brooks-on-q3-2017-r…	0
97	195.pdf	Midwest Energy Emissions Corp. (OTCQB:MEEC) Q3 2017 Earnings Conference Call November 20, 2017 5:00 PM ET	Analysts Operator Steven Ralston - Zacks Good afternoon, ladies and gentlemen, thank you for standing by. Welcome to the Midwest Energy Emissions Corporation Third Quarter 2017 Earnings Conference Call. https://seekingalpha.com/article/4126626-midwest-energy-emissions-meec-ceo-richard-macpherson-on-q3-2017-results-earnings-call 1/13 12/5/21, 8:16 PM Midwest Energy Emissions' (MEEC) CEO Richard Ma…	0
98	196.pdf	Amtech Systems, Inc. (NASDAQ:ASYS) Q4 2017 Earnings Conference Call November 20, 2017 5:00 PM ET	Fokko Pentinga - President and CEO Analysts Jeff Osborne - Cowen & Company Philip Shen - ROTH Capital Partners https://seekingalpha.com/article/4126625-amtech-systems-asys-ceo-fokko-pentinga-on-q4-2017-results-earnings-call-transcript 1/13 12/5/21, 8:17 PM Amtech Systems' (ASYS) CEO Fokko Pentinga on Q4 2017 Results - Earnings Call Transcript _ Seeking Alpha Operator Greetings, all participants w…	0
99	197.pdf	Inpixon (NASDAQ:INPX) Q3 2017 Earnings Conference Call November 20, 2017 4:30 PM ET	Third Quarter Ended September 30, 2017. All participants will be in listen-only mode [Operator Instructions]. After today's presentation, there will be an opportunity to ask questions [Operator Instructions]. Participants of this call are advised that the audio of this conference call is being broadcast live over the Internet and is also being recorded for playback purposes. A replay of this call…	0
100	198.pdf	Gazit-Globe (GZT) Q3 2017 Results Earnings Conference Call November 20, 2017 10:00 AM ET	Sam Damiani - TD Securities Ammar Shah - National Bank Ladies and gentlemen, thank you for standing by. Welcome to the Gazit-Globe Third Quarter 2017 Results Conference Call. At this time, all participants are in a listen-only mode. There will be a presentation followed by question-and-answer session. I advise you that this conference is being recorded today, Monday, November 20, 2017. The presen…	1
101	199.pdf	Abeona Therapeutics Inc. (NASDAQ:ABEO) Q3 2017 Earnings Conference Call November 20, 2017 10:00 AM ET	Jeff Davis - Chief Operating Officer Analysts Matthew Eckler - RBC Capital Markets Liav Abraham - Citigroup https://seekingalpha.com/article/4126486-abeona-therapeutics-abeo-ceo-tim-miller-on-q3-2017-results-earnings-call-transcript 1/19 12/5/21, 8:19 PM Abeona Therapeutics' (ABEO) CEO Tim Miller on Q3 2017 Results - Earnings Call Transcript _ Seeking Alpha Maury Raycroft - Jefferies Ram Selvaraj…	0
102	200.pdf	William Hill PLC (OTCPK:WIMHF) Q3 2017 Trading Update Call November 20, 2017 3:30 AM ET	Gavin Kelleher - Goodbody David Jennings - Davy Alistair Ross - Investec Patrick Coffey - Barclays Tal Grant - Credit Suisse Joe Thomas HSBC https://seekingalpha.com/article/4126420-william-hills-wimhf-ceo-philip-bowcock-on-q3-2017-trading-update-transcript 1/12 12/5/21, 8:19 PM William Hill's (WIMHF) CEO Philip Bowcock on Q3 2017 Trading Update (Transcript) _ Seeking Alpha Joe Thomas - HSBC Jeff…	0
103	201.pdf	UTStarcom, Inc (NASDAQ:UTSI) Q3 2017 Earnings Conference Call November 20, 2017 8:00 AM ET	Ralph Fong Ladies and gentlemen, thank you for standing by for UTStarcom’s Third Quarter 2017 Earnings Conference Call. Please note that we are recording today’s conference call. I will now turn over the call to Mr. Ralph Fong, Director of The Blueshirt Group. Please go Thank you, operator and good morning everyone. Welcome to UTStarcom’s third quarter 2017 earnings conference call. Earlier today…	0
104	202.pdf	Fang Holdings Limited (NYSE:SFUN) Q3 2017 Earnings Conference Call November 17, 2017 8:00 AM ET	Analysts Monica Chen - Credit Suisse Binbin Ding - JPMorgan Wei Xiong - UBS Maria Minli - Deutsche Bank https://seekingalpha.com/article/4126146-fangs-sfun-ceo-vincent-mo-on-q3-2017-results-earnings-call-transcript 1/13 12/5/21, 8:20 PM Maria Minli Deutsche Bank Fang's (SFUN) CEO Vincent Mo on Q3 2017 Results - Earnings Call Transcript _ Seeking Alpha Ella Ji - China Renaissance Robert Cowell - 8…	0
105	203.pdf	Bouygues SA (OTCPK:BOUYF) Q3 2017 Earnings Conference Call November 16, 2017 3:00 AM ET	Jerry Dellis - Jefferies Dimitri Kallianiotis - Redburn Josep Pujal - Kepler Cheuvreux Stephane Beyazian - Raymond James Jakob Bluestone - Credit Suisse Nicolas Didio Berenberg https://seekingalpha.com/article/4126140-bouygues-bouyf-ceo-philippe-marien-on-q3-2017-results-earnings-call-transcript 1/31 12/5/21, 8:21 PM Bouygues' (BOUYF) CEO Philippe Marien on Q3 2017 Results - Earnings Call Transcr…	0
106	204.pdf	The Coca-Cola Co. (NYSE:KO) 2017 Investor Day November 16, 2017 12:30 PM ET	Mario García - President-Latin America Group Jim Dinkins - Incoming Group President for North America Kathy Waller - Executive Vice President, Chief Financial Officer Analysts William Chappell - SunTrust Robinson Humphrey https://seekingalpha.com/article/4126136-coca-colas-ko-ceo-james-quincey-hosts-2017-investor-day-transcript 1/78 12/5/21, 8:21 PM The Coca-Cola's (KO) CEO James Quincey Hosts 20…	0
107	205.pdf	Splunk, Inc. (NASDAQ:SPLK) Q3 2018 Earnings Call November 16, 2017 4:30 PM ET	Analysts Brian J. White - Drexel Hamilton LLC Brad Alan Zelnick - Credit Suisse Securities (NYSE:USA) LLC Michael Turits - Raymond James & Associates, Inc. Philip Winslow - Wells Fargo Securities LLC https://seekingalpha.com/article/4125817-splunk-splk-q3-2018-results-earnings-call-transcript 1/34 12/5/21, 8:23 PM Splunk (SPLK) Q3 2018 Results - Earnings Call Transcript _ Seeking Alpha John DiFuc…	0
108	206.pdf	Canacol Energy Ltd. (OTCQX:CNNEF) Q3 2017 Earnings Conference Call November 10, 2017 10:00 AM ET	Juan Dauder – CrediCorp Capital Daniel Gardiola – BTG Pactual Operator Hello, and welcome to the Canacol Energy Third Quarter 2017 Earnings conference call. All participants will be in listen-only mode. [Operator Instructions] I would now like to turn the conference over to Carolina Orozco, Director of Investor https://seekingalpha.com/article/4125801-canacol-energys-cnnef-ceo-charle-gamba-on-q3-…	0
109	207.pdf	Key Technology, Inc. (NYSEARCA:KTEC) Q4 2017 Earnings Conference Call November 16, 2017 5:00 PM ET	Operator Jim Ricchiuti - Needham & Company Good day, ladies and gentlemen. And welcome to the Key Technology Fiscal 2017 Fourth Quarter Conference Call. At this time, all participants are in a listen-only-mode. Later, we will conduct a question-and-answer session and instructions will be given at that time. [Operator Instructions] As a reminder, this conference call maybe recorded. I would now li…	0
110	208.pdf	Nanoco Group Plc (OTCPK:NNOCF) Preliminary Results for Year Ended 31 July 2017 Conference Call November 16, 2017 4:30 AM ET	Michael Edelman Good morning. Welcome to Nanoco's 2017 Preliminary Results Show for those listening on the webcast, welcome; for everyone in the room, welcome; order of housekeeping at the end. There will be questions, if you could use the mike; so people who are listening can you hear? https://seekingalpha.com/article/4125798-nanoco-groups-nnocf-ceo-michael-edelman-on-preliminary-results-for-yea…	0
111	209.pdf	Vascular Biogenics Ltd (NASDAQ:SPWH) Q3 2017 Earnings Conference Call November 16, 2017 4:30 PM ET	Kevan Talbot - Chief Financial Officer Analysts Kieran McGrath - Credit Suisse Andrew Burns - D.A. Davidson and Company https://seekingalpha.com/article/4125791-sportsmans-warehouse-holdings-spwh-ceo-john-schaefer-on-q3-2017-results-earnings-call 1/16 12/5/21, 8:25 PM Sportsman's Warehouse Holdings' (SPWH) CEO John Schaefer on Q3 2017 Results - Earnings Call Transcript _ Seeking Alpha Patrick McK…	0
112	210.pdf	Ascendis Pharma A/S (NASDAQ:ASND) Q3 2017 Earnings Conference Call November 16, 2017 4:30 PM ET	Analysts Jessica Fye - JP Morgan Tazeen Ahmad - Bank of America Merrill Lynch Alethia Young - Credit Suisse https://seekingalpha.com/article/4125790-ascendis-pharmas-asnd-ceo-jan-moller-mikkelsen-on-q3-2017-results-earnings-call-transcript 1/20 12/5/21, 8:25 PM Ascendis Pharma's (ASND) CEO Jan Moller Mikkelsen on Q3 2017 Results - Earnings Call Transcript _ Seeking Alpha Alethia Young Credit Suis…	1
113	211.pdf	Williams-Sonoma, Inc. (NYSE:WSM) Q3 2017 Earnings Call November 16, 2017 5:00 PM ET	Julie P. Whalen - Williams-Sonoma, Inc. Sameer Hassan - Williams-Sonoma, Inc. Felix J. Carbullido - Williams-Sonoma, Inc. Analysts Kate McShane - Citigroup Global Markets, Inc. https://seekingalpha.com/article/4125773-williams-sonoma-wsm-q3-2017-results-earnings-call-transcript S C C 1/32 12/5/21, 8:25 PM Williams-Sonoma (WSM) Q3 2017 Results - Earnings Call Transcript _ Seeking Alpha Christopher…	0
114	212.pdf	Williams-Sonoma, Inc. (NYSE:WSM) Q3 2017 Earnings Call November 16, 2017 5:00 PM ET	Julie P. Whalen - Williams-Sonoma, Inc. Sameer Hassan - Williams-Sonoma, Inc. Felix J. Carbullido - Williams-Sonoma, Inc. Analysts Kate McShane - Citigroup Global Markets, Inc. https://seekingalpha.com/article/4125773-williams-sonoma-wsm-q3-2017-results-earnings-call-transcript S C C 1/32 12/5/21, 8:26 PM Williams-Sonoma (WSM) Q3 2017 Results - Earnings Call Transcript _ Seeking Alpha Christopher…	0
115	213.pdf	Corium International, Inc. (NASDAQ:CORI) Q4 2017 Earnings Conference Call November 16, 2017 5:00 PM ET	Steve Brozak - WBB Serge Belanger - Needham & Company Operator Good day, ladies and gentlemen and welcome to Corium International's Conference Call for its Fourth Fiscal Quarter and Year-End 2017. At this time, all participants are in a listen-only mode. Later, we will conduct a question-and-answer session and instructions will be given at that time [Operator Instructions] And as a reminder this …	0
116	214.pdf	Gap, Inc. (NYSE:GPS) Q3 2017 Earnings Call November 16, 2017 5:00 PM ET	Teri L. List-Stoll - Gap, Inc. Analysts Matthew Robert Boss - JPMorgan Securities LLC Ike Boruchow - Wells Fargo Securities LLC Brian Jay Tunick - RBC Capital Markets LLC Simeon Avram Siegel - Nomura | Instinet https://seekingalpha.com/article/4125731-gap-gps-q3-2017-results-earnings-call-transcript 1/28 12/5/21, 8:26 PM Gap (GPS) Q3 2017 Results - Earnings Call Transcript _ Seeking Alpha Kimberl…	0
117	215.pdf	Cinedigm Corp (NASDAQ:CIDM) Q2 2018 Results Conference Call November 16, 2017 4:30 PM ET	Operator Terry Hackett - Hackett Management Good day, ladies and gentlemen, and welcome to the Cinedigm Corp Fiscal 2018 Second Quarter Earnings Call. At this time, all participants are in a listen-only mode. [Operator Instructions] Later we will conduct a question-and-answer session, and instructions will follow at that time. As a reminder, today’s conference is being recorded. I would now like …	0
118	216.pdf	Chesapeake Energy Corp. (NASDAQ:CHK) Bank of America Merrill Lynch 2017 Global Energy Conference November 16, 2017 2:50 PM ET	Jason, with that out of the way, I’ll leave it to you. Up next, we are very fortunate to have Jason Pigott, Executive VP of Operations and Technical from Chesapeake Energy. We will start with the presentation and then we’ll All right, sounds great. Thank you for having us today. Again, we’re really excited to tell you about the Chesapeake story. We are doing something a little bit different than …	1
119	217.pdf	Shoe Carnival, Inc. (NASDAQ:SCVL) Q3 2017 Results Conference Call November 16, 2017 4:30 PM ET	Analysts Sam Poser - Susquehanna Christopher Svezia - Wedbush Greg Pendy - Sidoti https://seekingalpha.com/article/4125718-shoe-carnivals-scvl-ceo-clifton-sifford-on-q3-2017-results-earnings-call-transcript 1/17 12/5/21, 8:28 PM Shoe Carnival's (SCVL) CEO Clifton Sifford on Q3 2017 Results - Earnings Call Transcript _ Seeking Alpha Operator Good afternoon and welcome to Shoe Carnival's Third Quar…	0
120	218.pdf	Applied Materials, Inc. (NASDAQ:AMAT) Q4 2017 Earnings Call November 16, 2017 4:30 PM ET	Daniel Durn - Applied Materials, Inc. Unverified Participant Analysts C. J. Muse - Evercore Group LLC Atif Malik - Citi Research https://seekingalpha.com/article/4125717-applied-materials-amat-q4-2017-results-earnings-call-transcript S C S 1/30 12/5/21, 8:29 PM Applied Materials (AMAT) Q4 2017 Results - Earnings Call Transcript _ Seeking Alpha Farhan Ahmad - Credit Suisse Securities (NYSE:USA) LL…	0
121	219.pdf	Tim Roberts - Head of Offices and Residential November 16, 2017 4:30 AM ET	Hemant Kotak - Green Street Michael Burt - Exane BNP Paribas Robert Duncan - Numis Securities Max Nimmo - Kempen & Company Chris Grigg https://seekingalpha.com/article/4125705-british-land-company-brlaf-ceo-chris-grigg-on-q2-2018-results-earnings-call-transcript 1/20 12/5/21, 8:29 PM British Land Company' (BRLAF) CEO Chris Grigg on Q2 2018 Results - Earnings Call Transcript _ Seeking Alpha Good m…	1
122	220.pdf	Spectrum Brands Holdings, Inc. (NYSE:SPB) Q4 2017 Earnings Call November 16, 2017 9:00 AM ET	Robert Labick - CJS Securities, Inc. Krystyna Metcalf - Raymond James & Associates, Inc. Sam Reid - Wells Fargo Securities LLC Christopher M. Carey - Bank of America Merrill Lynch Majid Khan - Tourbillon Capital Partners LP Jim A. Chartier - Monness, Crespi, Hardt & Co., Inc. Karru Martinson Jefferies LLC https://seekingalpha.com/article/4125533-spectrum-brands-holdings-spb-q4-2017-results-earnin…	1
123	221.pdf	AmeriGas Partners LP (NYSE:APU) Q3 2017 Earnings Conference Call November 16, 2017 8:30 AM ET	Francois Dietsch - Chief Financial Officer Analysts Operator Swayampakula Ramakanth - H.C. Wainwright https://seekingalpha.com/article/4125530-edaps-edap-ceo-marc-oczachowski-on-q3-2017-results-earnings-call-transcript 1/10 12/5/21, 8:30 PM Operator EDAP's (EDAP) CEO Marc Oczachowski on Q3 2017 Results - Earnings Call Transcript _ Seeking Alpha Greetings and welcome to the EDAP TMS Third Quarter …	0
124	222.pdf	Ocean Rig UDW Inc. (NASDAQ:ORIG) Q3 2017 Earnings Conference Call November 16, 2017 8:00 AM ET	Thank you for standing by ladies and gentlemen, and welcome to the Ocean Rig Conference Call on the Third Quarter 2017 Financial Results. We have with us Mr. Anthony Argyropoulos, Capital Market Special Advisor to CEO and Mr. Anthony Kandylidis, Vice President and CFO of the Company. At this time, all participants are in a listen only mode. There will be a presentation followed by a question-and-…	1
125	223.pdf	L Brands, Inc. (LB) Q3 2017 Earnings Call November 16, 2017 9:00 AM ET	Dein Boyle - Victoria's Secret Stores Jan Singer - Victoria's Secret Stores LLC Greg Unis - Victoria's Secret Nicholas P. M. Coe - L Brands, Inc. Martin Waters - L Brands, Inc. Analysts https://seekingalpha.com/article/4125508-l-brands-lb-q3-2017-results-earnings-call-transcript 1/24 12/5/21, 8:31 PM L Brands (LB) Q3 2017 Results - Earnings Call Transcript _ Seeking Alpha Kimberly Conroy Greenber…	0
126	224.pdf	Best Buy Co., Inc. (NYSE:BBY) Q3 2018 Earnings Call November 16, 2017 8:00 AM ET	Analysts Scott A. Mushkin - Wolfe Research LLC Peter Jacob Keith - Piper Jaffray & Co. Seth I. Sigman - Credit Suisse Securities (NYSE:USA) LLC Alan Rifkin - BTIG LLC https://seekingalpha.com/article/4125503-best-buy-bby-q3-2018-results-earnings-call-transcript 1/32 12/5/21, 8:31 PM Best Buy (BBY) Q3 2018 Results - Earnings Call Transcript _ Seeking Alpha Mike Baker - Deutsche Bank Securities, In…	0
127	225.pdf	Awilco Drilling PLC (OTCPK:AWLCF) Q3 2017 Results Conference Call November 16, 2017 9:00 AM ET	conference. Thank you. Jon Bryce Good afternoon, ladies and gentlemen. And welcome to the Awilco Drilling PLC's Q3 Presentation. My name is Marco and I will be your coordinator for today's event. For the duration of the call, your lines will be on listen-only. However there'll be an opportunity to ask questions later in the call. [Operator Instructions] I will now hand over to your host, Jon Oliv…	0
128	226.pdf	Xunlei Limited (NASDAQ:XNET) Q3 2017 Earnings Call November 16, 2017 8:00 AM ET	Ning Hu - AKQA Operator Good morning and thank you for standing by for Xunlei's Third Quarter 2017 Earnings Conference Call. At this time, all participants are in listen-only mode. After management's presentation, there will be a question-and-answer session. Today's conference call is being recorded. I would now like to turn the conference over to your host today, Ms. Dani Zhang, IR Director of X…	0
129	227.pdf	Hillenbrand, Inc. (NYSE:HI) Q4 2017 Results Earnings Conference Call November 16, 2017 8:00 AM ET	Kristina Cerniglia - SVP and CFO Daniel Moore - CJS Securities John Franzreb - Sidoti & Company Analysts Operator https://seekingalpha.com/article/4125483-hillenbrands-hi-ceo-joe-raver-on-q4-2017-results-earnings-call-transcript 1/21 12/5/21, 8:32 PM Hillenbrand's (HI) CEO Joe Raver on Q4 2017 Results - Earnings Call Transcript _ Seeking Alpha Good morning, everyone. And Welcome to Hillenbrand’s …	0
130	228.pdf	Aegean Marine Petroleum Network Inc. (OTC:ANW) Q3 2017 Earnings Conference Call November 16, 2017 8:30 AM ET	Ben Nolan - Stifel Joe Farricielli - Odeon Capital Operator Good morning and welcome to the Aegean Marine Petroleum Network Inc. Third Quarter and Nine Months 2017 Financial Results Conference Call and Presentation. https://seekingalpha.com/article/4125470-aegean-marine-petroleum-network-anw-q3-2017-results-earnings-call-transcript 1/22 12/5/21, 8:33 PM Aegean Marine Petroleum Network (ANW) Q3 20…	1
131	229.pdf	Experian plc (OTCQX:EXPGF) Q2 2018 Earnings Conference Call November 15, 2017 4:30 AM ET	George Gregory - Exane BNP Paribas Matija Gergolet - Goldman Sachs Tom Sykes - Deutsche Bank Andy Grobler - Credit Suisse Ed Steele - Citi Rory McKenzie UBS https://seekingalpha.com/article/4125267-experians-expgf-ceo-brian-cassin-on-q2-2018-results-earnings-call-transcript 1/39 12/5/21, 8:51 PM Experian's (EXPGF) CEO Brian Cassin on Q2 2018 Results - Earnings Call Transcript _ Seeking Alpha Rory…	0
132	230.pdf	Yirendai Ltd. (NYSE:YRD) Q3 2017 Earnings Conference Call November 14, 2017 7:00 PM ET	Joanne Liu – Vice President-Finance Analysts Ella Ji – China Renaissance Patricia Cheng – CLSA Yang Cao – Chief Operating Officer and Chief Technology Officer https://seekingalpha.com/article/4125104-yirendais-yrd-ceo-yihan-fang-on-q3-2017-results-earnings-call-transcript 1/18 12/5/21, 8:52 PM Patricia Cheng CLSA Tian Hou – T.H. Capital Yirendai's (YRD) CEO Yihan Fang on Q3 2017 Results - Earning…	1
133	231.pdf	Barratt Developments Plc. (OTCPK:BTDPF) Trading Update Conference Call November 15, 2017 3:30 AM ET	William Jones - Redburn Partners LLP Gregor Kuglitsch - UBS Samuel Thomas - Credit Suisse Aynsley Lammin - Canaccord Genuity Kevin Cammack - Cenkos Securities Mark Howson HSBC https://seekingalpha.com/article/4125103-barratt-developments-btdpf-ceo-david-thomas-on-trading-update-conference-call-transcript 1/18 12/5/21, 8:55 PM Barratt Developments' (BTDPF) CEO David Thomas on Trading Update Confer…	0
134	232.pdf	Leoni AG (OTC:LNNNF) Q3 2017 Earnings Conference Call November 15, 2017 4:00 AM ET	Julian Radlinger - UBS Investment Bank Jürgen Pieper - Metzler Equities Christian Ludwig - Bankhaus Lampe KG Christoph Laskawi - Deutsche Bank AG Michael Raab - Kepler Cheuvreux Operator https://seekingalpha.com/article/4125098-leoni-ags-lnnnf-ceo-dieter-belle-on-q3-2017-results-earnings-call-transcript 1/19 12/5/21, 8:55 PM Operator Leoni AG's (LNNNF) CEO Dieter Bellé on Q3 2017 Results - Earnin…	0
135	1.66595-novellus-systems-inc-f1q08-mid-quarter-earnings-call-transcript.pdf	Novellus Systems Inc. (NASDAQ:NVLS-OLD) Q1 FY08 Mid-Quarter Earnings Call Transcript February 28, 2008 5:30 PM ET	Jagdish Iyer - UBS CJ Muse - Lehman Brothers Mahesh Sanganeria - RBC Capital Markets Benedict Pang - Caris and Company William Ong - American Technology Research Timothy Summers - Stanford Group Company Atif Malik Morgan Stanley https://seekingalpha.com/article/66595-novellus-systems-inc-f1q08-mid-quarter-earnings-call-transcript 1/15 12/3/21, 10:38 AM Novellus Systems Inc. F1Q08 Mid-Quarter Earn…	1
136	10-65612-drs-technologies-inc-f3q08-qtr-end-12-31-07-earnings-call-transcrip.pdf	DRS Technologies Inc. (DRS-OLD) Q3 FY08 Earnings Call February 8, 2008 9:00 AM ET	David Gremmels - Thomas Weisel Partners Myles Walton - Oppenheimer & Co. Peter Skibitski - Credit Suisse Stephen Levenson - Stifel Nicolaus and Company Steve Binder - Bear Stearns Michael French Morgan Joseph & Co https://seekingalpha.com/article/65612-drs-technologies-inc-f3q08-qtr-end-12-31-07-earnings-call-transcript 1/27 12/3/21, 11:00 AM DRS Technologies, Inc. F3Q08 (Qtr. End 12/31/07) Earni…	1
137	100.pdf	HealthSouth Corporation (HLS) Q4 2007 Earnings Call February 26, 2008 8:30 AM ET	Analysts Frank Morgan - Jefferies & Company Miles Highsmith - Credit Suisse Derrick Dagnan - Avondale Partners https://seekingalpha.com/article/69636-healthsouth-corporation-q4-2007-earnings-call-transcript 1/35 12/4/21, 9:40 AM HealthSouth Corporation Q4 2007 Earnings Call Transcript | Seeking Alpha Kemp Dolliver - Cowen and Company Robert Hawkins - Stifel Nicolaus Kenneth Weakley – Credit Suiss…	1
138	101.pdf	Foster Wheeler Ltd. (FWLT) Q4 FY07 Earnings Call February 26, 2008 12:00 PM ET Executives	Analysts Barry Bannister - Stifel Nicolaus Andrew Kaplowitz - Lehman Brothers John Rodgers - D. A. Davidson & Co Brian Chin - Citi Investment Research Nicholas Capuano - Imperial Capital Simon Wilson Sarasin Investment Management https://seekingalpha.com/article/66253-foster-wheeler-ltd-q4-2007-earnings-call-transcript 1/28 12/4/21, 9:41 AM Foster Wheeler Ltd. Q4 2007 Earnings Call Transcript | S…	1
139	102.pdf	KBR, Inc. (NYSE:KBR) Q4 FY07 Earnings Call February 26, 2008 11:00 AM ET	Jamie Cook - Credit Suisse Barry Bannister - Stifel Nicolaus Brad Handler - Wachovia Capital John B. Rogers - D.A. Davidson & Co. Operator https://seekingalpha.com/article/66252-kbr-inc-q4-2007-earnings-call-transcript 1/27 12/4/21, 9:42 AM KBR, Inc. Q4 2007 Earnings Call Transcript | Seeking Alpha Good day everyone, and welcome to the 2007 Fourth Quarter Earnings Conference Call hosted by KBR. T…	0
140	103.pdf	Donaldson Company, Inc. (NYSE:DCI) Q2 FY08 Earnings Call February 26, 2008 11:00 AM ET	Eli Lustgarten - Longbow Securities Charles Brady - BMO Capital Markets R. Scott Graham - Bear Stearns Brian Drab - William Blair & Co. Richard Eastman - Robert W. Baird Operator Thank you for joining the Donaldson Company Second Quarter Fiscal 2008 Conference https://seekingalpha.com/article/66251-donaldson-co-inc-q2-2008-earnings-call-transcript 1/26 12/4/21, 9:42 AM Donaldson Co., Inc. Q2 2008…	0
141	104.pdf	Continental Resources, Inc. (NYSE:CLR) Q4 FY07 Earnings Call February 26, 2008	Analysts Operator Instructions]. Good day, ladies and gentlemen, and welcome to the QuarterFour 2007 Continental Resources, Inc. Earnings Conference Call. My nameis Nakeda, and I will be your coordinator for today. At this time, allparticipants are in listen-only mode. We will be facilitating aquestion-and-answer session towards the end of this conference.[Operator https://seekingalpha.com/articl…	0
142	105.pdf	Sotheby's Holdings, Inc. (NYSE:BID) Q4 FY07 Earnings Conference Call February 26, 2008 4:45 PM ET	Kristine Koerber - JMP Securities Steven Reeves - JP Morgan Jody Kane - Sidoti & Company Rommel Dionisio - Wedbush Morgan Securities Rob Schwartz - JL Advisors Operator https://seekingalpha.com/article/66249-sothebys-q4-2007-earnings-call-transcript 1/23 12/4/21, 9:43 AM Sotheby's Q4 2007 Earnings Call Transcript _ Seeking Alpha Good afternoon ladies and gentlemen, and welcome to the Sotheby's Fo…	1
143	106.pdf	ONEOK, Inc. (NYSE:OKE) Q4 FY07 Earnings Call February 26, 2008 11:00 AM ET	Pierce Norton - EVP, Natural Gas Terry Spencer - EVP, Natural Gas Liquids James C. Kneale - President and COO Analysts Faisel Khan - Smith Barney Citigroup https://seekingalpha.com/article/66248-oneok-inc-q4-2007-earnings-call-transcript 1/22 12/4/21, 9:44 AM Faisel Khan Smith Barney Citigroup ONEOK, Inc. Q4 2007 Earnings Call Transcript _ Seeking Alpha Operator Good day, ladies and gentlemen. An…	0
144	107.pdf	Bill Barrett Corp. (BBG) Q4 FY07 Earnings Call February 26, 2008 12:00 PM ET Executives	Robert Lynd - Simmons & Company International Eric Hagen - Merrill Lynch Larry Busnardo - Tri Stone Capital Inc. Raymond Deacon - BMO Capital Markets Operator https://seekingalpha.com/article/66247-bill-barrett-corp-q4-2007-earnings-call-transcript 1/29 12/4/21, 9:45 AM Bill Barrett Corp. Q4 2007 Earnings Call Transcript | Seeking Alpha Good afternoon. My name is Julianne and I will be your confe…	0
145	108.pdf	Unit Corporation (NYSE:UNT) Q4 FY07 Earnings Call February 26, 2008 11:30 AM ET Executives	Pierre E. Conner III - Capital One Southcoast Robert Christensen - Buckingham Research Thomas A. Escott - Pritchard Capital Operator Good afternoon. My name is Dougherty and I will be your conference operator today. At this time, I would like to welcome everyone to the Unit Corporation Fourth Quarter and Year-End Results Conference Call. All lines have been placed on mute to prevent any https://s…	1
146	109.pdf	Nationwide Health Properties, Inc. (NYSE:NHP) 4Q FY07 Earnings Call February 26, 2008 11:30 AM ET	Brent Chappell - VP Portfolio Management Analysts Craig Melcher - Citigroup Kristin Brown - Deutsche Bank Dustin Pizzo - Banc of America Securities Michael Mueller - JP Morgan Jerry L Doctrow Stifel Nicolaus https://seekingalpha.com/article/66245-nationwide-health-properties-inc-q4-2007-earnings-call-transcript 1/53 12/4/21, 9:46 AM Nationwide Health Properties, Inc. Q4 2007 Earnings Call Transcr…	0
147	11-Newmont_Mining_Corp._Q4_2007_Earnings_Call_Transcript___Seeking_Alpha.pdf	Newmont Mining Corp. (NYSE:NEM) Q4 FY07 Earnings Call February 21, 2008 4:00 PM ET	John Tumazos - John Tumazos Independent Analysts John Hill - Citi Victor Flores - HSBC Guy Lansdown - Sr. VP, Project Development and Operations Services https://seekingalpha.com/article/65611-newmont-mining-corp-q4-2007-earnings-call-transcript 1/22 12/3/21, 11:01 AM Victor Flores HSBC Newmont Mining Corp. Q4 2007 Earnings Call Transcript _ Seeking Alpha David Haughton - BMO Capital Markets Mark…	0
148	111.pdf	Frontier Oil Corporation (NYSE:FTO) Q4 FY07 Earnings Call February 26, 2008 11:00 AM ET	Arjun Murti - Goldman Sachs Chi Chow - Tristone Capital Jeff Dietert - Simmons Daniel Burke - Johnson Rice Jacques Rousseau - Back Bay Research Kenneth Pounds - Nutmeg Securities Operator https://seekingalpha.com/article/66244-frontier-oil-corp-q4-2007-earnings-call-transcript 1/21 12/4/21, 9:48 AM Operator Frontier Oil Corp. Q4 2007 Earnings Call Transcript _ Seeking Alpha Good day ladies and ge…	1
149	112.pdf	Sempra Energy (NYSE:SRE) Q4 FY07 Earnings Call February 26, 2008 1:00 PM ET	California Gas Co. Analysts John Kiani - Deutsche Bank Debra L. Reed - President and CEO of San Diego Gas & Electric and Southern Lasan Johong - RBC Capital Markets https://seekingalpha.com/article/66243-sempra-energy-q4-2007-earnings-call-transcript 1/36 12/4/21, 9:49 AM Lasan Johong RBC Capital Markets Sempra Energy Q4 2007 Earnings Call Transcript _ Seeking Alpha Paul Patterson - Glenrock Asso…	0
150	113.pdf	Health Management Associates Inc. (NYSE:HMA-OLD) Q4 2007 Earnings Call February 21, 2008 11:00 AM ET	Jason Gurda - Bear Stearns Christine Arnold - Morgan Stanley Bill Bonello - Wachovia Shelley Gnall - Goldman Sachs Adam Feinstein - Lehman Brothers Sheryl Skolnick - CRT Capital Group John Ransom Raymond James https://seekingalpha.com/article/65604-health-management-associates-q4-2007-earnings-call-transcript 1/41 12/4/21, 9:53 AM Health Management Associates Q4 2007 Earnings Call Transcript _ Se…	1
151	114.pdf	Brandywine Realty Trust (NYSE:BDN) Q4 2007 Earnings Call February 21, 2008 11:00 AM ET	George Sowa - EVP Darryl Dunn - VP and CAO Gabe Mainardi - Corporate Controller Analysts Anthony Paolone - JPMorgan https://seekingalpha.com/article/65603-brandywine-realty-trust-q4-2007-earnings-call-transcript 1/50 12/4/21, 9:53 AM Anthony Paolone JPMorgan Brandywine Realty Trust Q4 2007 Earnings Call Transcript _ Seeking Alpha Jordan Sadler - KeyBanc Capital Market Ian Weissman - Merrill Lynch…	0
152	115.pdf	The Williams Companies, Inc. (NYSE:WMB) Q4 FY07 Earnings Call February 21, 2008 10:00 AM ET	Phillip D. Wright - President of Gas Pipeline Analysts Lasan Johong - RBC Capital Markets Richard Gross - Lehman Brothers Faisel Khan - Citigroup Investment Research Jeff Coviello - Duquesne Capital Christopher Taylor Evergreen Investment https://seekingalpha.com/article/65602-the-williams-cos-inc-q4-2007-earnings-call-transcript-transcript 1/38 12/4/21, 9:53 AM The Williams Cos., Inc. Q4 2007 Ea…	1
153	116.pdf	j2 Global Communications (JCOM) Q4 2007 Earnings Call February 19, 2008 5:00 PM ET	Corey Tobin - William Blair & Co. Youssef Squali – Jefferies Brad Whitt - Broadpoint Capital Robert Breza - RBC Capital Partners Ray Archibald - Kaufman Bros. Shyam Patil - Raymond James Tavis McCourt Morgan Keegan https://seekingalpha.com/article/65601-j2-global-communications-q4-2007-earnings-call-transcript 1/43 12/4/21, 9:54 AM j2 Global Communications Q4 2007 Earnings Call Transcript | Seeki…	1
154	12.Global_Industries_Ltd._Q4_2007_Earnings_Call_Transcript_Transcript___Seek.pdf	Global Industries, Ltd. (NASDAQ:GLBL-OLD) Q4 FY07 Earnings Call February 21, 2008	Joseph Gibney - Capital One Southcoast Joe Agular - Johnson Rice & Company William J. Dezellem - Tieton Capital Karen David-Green - Oppenheimer & Co. Victor Marchon - RBC Capital Markets Operator https://seekingalpha.com/article/65609-global-industries-ltd-q4-2007-earnings-call-transcript-transcript 1/26 12/3/21, 11:04 AM Global Industries Ltd. Q4 2007 Earnings Call Transcript Transcript _ Seekin…	0
155	13.Tim_Hortons_Inc._Q4_2007_Earnings_Call_Transcript___Seeking_Alpha.pdf	Tim Hortons Inc. (THI) Q4 2007 Earnings Call February 20, 2008 10:30 AM ET Executives	Irene Nattel – RBC Capital Markets Glen Petraglia – Citigroup Investment Research Jim Durran – National Bank Financial Adina Bloom – TD Newcrest Turan Quettawala – Scotia Capital Steve Kron – Goldman Sachs https://seekingalpha.com/article/65608-tim-hortons-inc-q4-2007-earnings-call-transcript 1/33 12/3/21, 11:09 AM Tim Hortons Inc. Q4 2007 Earnings Call Transcript _ Seeking Alpha Richard Piticcco…	0
156	14.Quest_Diagnostics,_Inc._Q4_2007_Earnings_Call_Transcript___Seeking_Alpha.pdf	Quest Diagnostics, Inc. (NYSE:DGX) Q4 FY07 Earnings Call February 21, 2008 8:30 AM ET	Analysts Bill Bonello - Wachovia Securities Tom Gallucci - Merrill Lynch William Quirk - Piper Jaffray Robert M Willoughby - Banc of America Securities https://seekingalpha.com/article/65607-quest-diagnostics-inc-q4-2007-earnings-call-transcript 1/34 12/3/21, 11:12 AM Robert M. Willoughby Banc of America Securities Quest Diagnostics, Inc. Q4 2007 Earnings Call Transcript _ Seeking Alpha Ralph Gia…	0
157	15.Safeway_Inc.,_Q4_2007_Earnings_Call_Transcript___Seeking_Alpha.pdf	Safeway Inc. (NYSE:SWY) Q4 2007 Earnings Call February 21, 2008 11:00 AM ET Executives	Neil Currie - UBS Jason Whitmer - Cleveland Research Bob Summers - Bear Stearns Chuck Cerankosky - FTN Midwest Mark Wiltamuth - Morgan Stanley Ed Kelly - Credit Suisse https://seekingalpha.com/article/65606-safeway-inc-q4-2007-earnings-call-transcript 1/44 12/3/21, 11:20 AM Safeway Inc., Q4 2007 Earnings Call Transcript _ Seeking Alpha Deborah Weinswig - Citigroup Andrew Wolf - BB&T Capital Marke…	1
158	16.Fisher_Communications,_Inc._Q4_2007_Earnings_Call_Transcript___Seeking_Al.pdf	Fisher Communications, Inc. (FSCI) Q4 2007 Earnings Call February 21, 2008 4:00 PM Colleen Brown - President, Chief Executive Officer	(Brian Kato - Teraview) Operator Welcome to the Fisher Communications Fourth Quarter 2007 Earnings Conference Call. This call is also being webcast. A replay of this conference call will be available later this afternoon, and can be accessed through Fisher's website at www.fsci.com. https://seekingalpha.com/article/65605-fisher-communications-inc-q4-2007-earnings-call-transcript 1/16 12/3/21, 11:…	0
159	17.Health_Management_Associates_Q4_2007_Earnings_Call_Transcript___Seeking_A.pdf	Health Management Associates Inc. (NYSE:HMA-OLD) Q4 2007 Earnings Call February 21, 2008 11:00 AM ET	Jason Gurda - Bear Stearns Christine Arnold - Morgan Stanley Bill Bonello - Wachovia Shelley Gnall - Goldman Sachs Adam Feinstein - Lehman Brothers Sheryl Skolnick - CRT Capital Group John Ransom Raymond James https://seekingalpha.com/article/65604-health-management-associates-q4-2007-earnings-call-transcript 1/41 12/3/21, 11:23 AM Health Management Associates Q4 2007 Earnings Call Transcript _ S…	0
160	18.Brandywine_Realty_Trust_Q4_2007_Earnings_Call_Transcript___Seeking_Alpha.pdf	Brandywine Realty Trust (NYSE:BDN) Q4 2007 Earnings Call February 21, 2008 11:00 AM ET	George Sowa - EVP Darryl Dunn - VP and CAO Gabe Mainardi - Corporate Controller Analysts Anthony Paolone - JPMorgan https://seekingalpha.com/article/65603-brandywine-realty-trust-q4-2007-earnings-call-transcript 1/50 12/3/21, 11:25 AM Anthony Paolone JPMorgan Brandywine Realty Trust Q4 2007 Earnings Call Transcript _ Seeking Alpha Jordan Sadler - KeyBanc Capital Market Ian Weissman - Merrill Lync…	0
161	19.j2_Global_Communications_Q4_2007_Earnings_Call_Transcript___Seeking_Alpha.pdf	j2 Global Communications (JCOM) Q4 2007 Earnings Call February 19, 2008 5:00 PM ET	Analysts Daniel Ives - Friedman Billings Ramsey Corey Tobin - William Blair & Co. Youssef Squali – Jefferies Brad Whitt - Broadpoint Capital https://seekingalpha.com/article/65601-j2-global-communications-q4-2007-earnings-call-transcript 1/43 12/3/21, 11:26 AM Brad Whitt Broadpoint Capital j2 Global Communications Q4 2007 Earnings Call Transcript _ Seeking Alpha Robert Breza - RBC Capital Partner…	0
162	2.Oil_States_International_Inc._Q4_2007_Earnings_Call_Transcript___Seeking_A.pdf	Oil States International Inc. (NYSE:OIS) Q4 2007 Earnings Call February 20, 2008 11:00 AM ET	Bill Herbert - Simmons Ken Sill - Credit Suisse Jeff Tillery - Tudor Pickering Kevin Pollard - JPMorgan Joe Gibney - Capital One Southcoast https://seekingalpha.com/article/65390-oil-states-international-inc-q4-2007-earnings-call-transcript 1/27 12/3/21, 10:47 AM Joe Gibney Capital One Southcoast Oil States International Inc. Q4 2007 Earnings Call Transcript _ Seeking Alpha Chuck Minervino - Gold…	1
163	20.The_Williams_Cos.,_Inc._Q4_2007_Earnings_Call_Transcript_Transcript___See.pdf	The Williams Companies, Inc. (NYSE:WMB) Q4 FY07 Earnings Call February 21, 2008 10:00 AM ET	Phillip D. Wright - President of Gas Pipeline Analysts Lasan Johong - RBC Capital Markets Richard Gross - Lehman Brothers Faisel Khan - Citigroup Investment Research Jeff Coviello - Duquesne Capital Christopher Taylor Evergreen Investment https://seekingalpha.com/article/65602-the-williams-cos-inc-q4-2007-earnings-call-transcript-transcript 1/38 12/3/21, 11:26 AM The Williams Cos., Inc. Q4 2007 E…	1
164	21.pdf	First Mercury Financial Corp. (FMR) F4Q07 Earnings Call February 21, 2008 11:00 AM ET	Doug Moore – Ferris, Baker Watts, Inc. Matthew Haberman – J. P. Morgan Adam Franc – King Capital Operator https://seekingalpha.com/article/65600-first-mercury-financial-corp-f4q07-qtr-end-12-31-07-earnings-call-transcript 1/13 12/3/21, 11:31 AM First Mercury Financial Corp. F4Q07 (Qtr End 12/31/07) Earnings Call Transcript _ Seeking Alpha Welcome Ladies and Gentlemen to the First Mercury Financia…	0
165	22.pdf	School Specialty, Inc. (NASDAQ:SCHS) F3Q08 Earnings Call February 21, 2008 11:00	Mark Marostica – Piper Jaffray Bob Evans – Craig-Hallum Capital Lee Matheson – KG Harrison and Partners Lana Gordon Lasek – Robert W. Baird Charles Laporta - Artos Partners Operator https://seekingalpha.com/article/65599-school-specialty-inc-f3q08-qtr-end-01-26-08-earnings-call-transcript 1/29 12/3/21, 11:31 AM School Specialty, Inc. F3Q08 (Qtr End 01/26/08) Earnings Call Transcript _ Seeking Alp…	1
166	23.pdf	TRW Automotive Holdings Corp. (NYSE:TRW) Q4 FY07 Earnings Call February 21, 2008 8:30 AM ET	Jonathan Steinmetz - Morgan Stanley Chris Ceraso - Credit SuisseFB Rod Lache - Deutsche Bank Douglas Karson - Banc of America Brett Hoselton - KeyBanc Operator https://seekingalpha.com/article/65597-trw-automotive-holdings-corp-q4-2007-earnings-call-transcript-transcript 1/33 12/3/21, 11:32 AM TRW Automotive Holdings Corp. Q4 2007 Earnings Call Transcript Transcript _ Seeking Alpha Good morning, …	1
167	24.pdf	Builders FirstSource Inc. (NYSE:BLDR) Q4 2007 Earnings Call February 21, 2008 11:00 AM ET	Analysts Nishu Sood - Deutsche Bank Robert Manowitz – RBS Walter Branson - Regiment Capital Nitin Dahiya - Lehman Brothers https://seekingalpha.com/article/65595-builders-firstsource-inc-q4-2007-earnings-call-transcript 1/32 12/3/21, 11:33 AM Nitin Dahiya Lehman Brothers Builders FirstSource, Inc. Q4 2007 Earnings Call Transcript _ Seeking Alpha Rob [Joss] with Van Kampen Investments Analyst for …	0
168	25.pdf	Hertz Global Holdings Inc. (NASDAQ:HTZ) Q4 2007 Earnings Call February 21, 2008 10:00 AM ET	Rich Kwas - Wachovia Emily Shanks - Lehman Brothers Joe Nothwang, EVP and President, Vehicle Rental and Leasing, The Americas and Pacific Analysts Michel Taride - EVP and President, Hertz Europe Limited Gerry Plescia - EVP and President of Hertz https://seekingalpha.com/article/65589-hertz-global-holdings-q4-2007-earnings-call-transcript 1/41 12/3/21, 11:34 AM Hertz Global Holdings Q4 2007 Earnin…	1
169	26.pdf	Psychiatric Solutions Inc. (OTCPK:PSYS) Q4 2007 Earnings Call February 21, 2008 10:00 AM ET	Adam Feinstein - Lehman Brothers Darren Lehrich - Deutsche Bank Andreas Dirnagl - JPMorgan Tom Gallucci - Merrill Lynch Ken Wekley - Credit Suisse John Ransom - Raymond James & Associates Kevin Campbell Avondale Partners https://seekingalpha.com/article/65588-psychiatric-solutions-q4-2007-earnings-call-transcript 1/32 12/3/21, 11:35 AM Psychiatric Solutions Q4 2007 Earnings Call Transcript _ Seek…	0
170	27.pdf	American Railcar Industries (NASDAQ:ARII) Q4 2007 Earnings Call February 21, 2008 10:00 AM ET	Robert Lagaipa – Oppenheimer & Co. Paul Bodnar – Longbow Research Joe Box – Keybanc Capital Markets Bryan Giwi – Giwi Asset Management Peter Nesvold – Bear Stearns Operator Good day ladies and gentlemen and welcome the American Railcar Industries Fourth https://seekingalpha.com/article/65587-american-railcar-industries-q4-2007-earnings-call-transcript 1/17 12/3/21, 11:35 AM American Railcar Indus…	1
171	28.pdf	Interactive Data Corporation (IDC) Q4 2007 Earnings Call February 21, 2008 11:00 AM ET	George Grose - American Capital Partners Peter McGratty - Calcine Management Operator Good morning. At this time, I would like to welcome everyone to the Interactive Data fourth quarter and full year 2007 financial results conference call. (Operator Instructions) Thank you. Mr. Kramer, you may begin your conference. Andrew Kramer https://seekingalpha.com/article/65585-interactive-data-corporation…	1
172	29.pdf	MGM MIRAGE (NYSE:MGM) Q4 2007 Earnings Call February 20, 2008 11:00 AM ET	Daniel D'Arrigo - EV & CFO Gary Jacobs - EVP, General Counsel & Secretary Aldo Manzini - EVP & CAO Analysts Lawrence Klatzkin - Jefferies & Co https://seekingalpha.com/article/65581-mgm-mirage-q4-2007-earnings-call-transcript 1/27 12/3/21, 11:36 AM Lawrence Klatzkin Jefferies & Co. MGM MIRAGE Q4 2007 Earnings Call Transcript _ Seeking Alpha Joseph Greff - Bear Stearns Robin Farley - UBS David Kat…	1
173	3.China_Medical_Technologies_F3Q07_(Qtr_End_12_31_07)_Earnings_Call_Transcri.pdf	China Medical Technologies, Inc. (CMED) F3Q07 Earnings Call February 28, 2008 8:00 Xiaodong Wu - Chairman of the Board, Chief Executive Officer	Jinsong Du - Credit Suisse David Ginter - Oak Ridge Financial Luke Langford - Langford Capital Management Operator Good day, ladies and gentlemen and welcome to the Q3 2007 China Medical Technologies Incorporated earnings conference call. (Operator Instructions) I would now like to turn the call over to Ms. Winnie Fan. Please proceed, Ms. Fan. https://seekingalpha.com/article/66596-china-medical-…	1
174	30.pdf	MGM MIRAGE (NYSE:MGM) Q4 2007 Earnings Call February 20, 2008 11:00 AM ET	Paul Middleton – Treasurer William Tryon – Manager IR Analysts Avinash Kant – Broadpoint Capital Inc. James Chen – BB & T Capital Markets https://seekingalpha.com/article/65579-rogers-corporation-q4-2007-earnings-call-transcript 1/39 12/3/21, 11:36 AM James Chen BB & T Capital Markets Rogers Corporation Q4 2007 Earnings Call Transcript | Seeking Alpha Jay Harris – Goldsmith & Harris Jiwon Lee - S…	1
175	31.pdf	Edgewater Technology Inc. (NASDAQ:EDGW) Q4 2007 Earnings Call February 27	Arnold Ursaner – CJS Securities Mac Onrodacil – King Capital Management Karen Smith – Rubadi Macon Rudisil – Keane Capital Management Operator Welcome to Edgewater Technology Inc. Fourth Quarter and Full Year Fiscal 2007 Financial Results Conference call. At this time I would like to inform you that this https://seekingalpha.com/article/66514-edgewater-technology-inc-q4-2007-earnings-call-transcr…	0
176	32.pdf	South Jersey Industries (NYSE:SJI) Q4 2007 Earnings Call February 28, 2008 2:00 PM ET	Analysts Dan Fidell - Brean Murray, Carret & Co. Darren Conti - Wachovia Securities Operator https://seekingalpha.com/article/69240-south-jersey-industries-inc-q4-2007-earnings-call-transcript 1/12 12/3/21, 11:51 AM South Jersey Industries, Inc. Q4 2007 Earnings Call Transcript _ Seeking Alpha Good day Ladies and Gentleman, and welcome to the Fourth Quarter and Year-End 2007 South Jersey Industri…	1
177	33.pdf	Kosan Biosciences Incorporated (KOSN) Q4 2007 Earnings Call February 28, 2008 4:30 PM ET	Mark Monane - Needham Han Li - Stanford Group Associates Bret Holley – Oppenheimer Howard Liang - Leerink Swann Alex To – Natixis Eric Schmidt Cowen https://seekingalpha.com/article/69236-kosan-biosciences-incorporated-q4-2007-earnings-call-transcript 1/22 12/3/21, 11:52 AM Eric Schmidt - Cowen Kosan Biosciences Incorporated Q4 2007 Earnings Call Transcript _ Seeking Alpha Michael King - Rodman &…	1
178	34.pdf	Wausau Paper Corp. (NYSE:WPP-OLD) Q4 2007 Earnings Call February 5, 2008 11:00 AM ET	Perry Grueber – CFO Analysts Steven Nissen - Mindful Capital Mark Wilde – Deutsche Bank Securities Jonathan Lichter – Sidoti David – Unidentified Participant. Operator https://seekingalpha.com/article/69237-wausau-paper-corp-q4-2007-earnings-call-transcript 1/26 12/3/21, 11:53 AM Operator Wausau Paper Corp Q4 2007 Earnings Call Transcript _ Seeking Alpha Welcome to the Wausau Paper 2007 fourth qu…	0
179	35.pdf	DTS, Inc (NASDAQ:DTSI) Q4 2007 Earnings Call February 28, 2008 5:00 PM ET Executives	Alan Davis - D.A. Davidson Caitlin Bower - Thomas Weisel Partners Mike Olson - Piper Jaffray Barbara Coffey - Kaufman Brothers J. D. Padgett - Boston Company Steven Frankel - Canaccord Adams https://seekingalpha.com/article/69223-dts-inc-q4-2007-earnings-call-transcript 1/25 12/3/21, 11:53 AM DTS, Inc Q4 2007 Earnings Call Transcript _ Seeking Alpha Rob Stone - Cowen and Company Analyst for Paul …	0
180	36.pdf	California Water Service Group (NYSE:CWT) Q4 2007 Earnings Call February 28, 2008	Tim Winter - Smith Moore Francesca McCann - Stanford Financial Operator Good day, ladies and gentlemen and welcome to your fourth quarter and year end 2007 results conference call. (Operator Instructions) I would now like to introduce your host for today’s conference, Mr. Marty Kropelnicki, Vice President and Chief Financial Officer at California Water Service Group. Martin Kropelnicki https://se…	0
181	37.pdf	Deckers Outdoor Corporation (NYSE:DECK) Q4 2007 Earnings Call February 28, 2008 4:30 PM ET	Analysts Jeff Klinefelter - Piper Jaffray Mitch Kummetz - Robert W. Baird Jeff Mintz - Wedbush Morgan Securities, Inc. Todd Slater - Lazard Capital Markets LLC https://seekingalpha.com/article/69218-deckers-outdoor-corporation-q4-2007-earnings-call-transcript 1/30 12/3/21, 12:44 PM Todd Slater Lazard Capital Markets LLC Deckers Outdoor Corporation Q4 2007 Earnings Call Transcript _ Seeking Alpha …	1
182	38.pdf	Esterline Corporation (NYSE:ESL) F1Q08 Earnings Call February 28, 2008 5:00 PM ET Executives	Bill Dezellem - Titan Capital Management Howard Rubel – Jefferies & Company Donald - Credit Suisse First Boston Operator Ladies and gentlemen, welcome to the Esterline Technologies First Quarter Earnings Conference Call. At this time, all participants are in a listen-only mode. Following the presentation, we will conduct a question-and-answer session. At that time, participants https://seekingalp…	0
183	39.pdf	Esterline Corporation (NYSE:ESL) F1Q08 Earnings Call February 28, 2008 5:00 PM ET Executives	Bill Dezellem - Titan Capital Management Howard Rubel – Jefferies & Company Donald - Credit Suisse First Boston Operator Ladies and gentlemen, welcome to the Esterline Technologies First Quarter Earnings Conference Call. At this time, all participants are in a listen-only mode. Following the presentation, we will conduct a question-and-answer session. At that time, participants https://seekingalp…	0
184	40.pdf	Cleco Corporation (NYSE:CNL) Q4 2007 Earnings Call February 28, 2008 11:00 AM ET Executives	Neil Stein - Levin Capital Paul Ridzon – KeyBanc Becca Followill - Tudor Pickering Gordon Howald - Calyon Securities Timothy Yee - KeyBanc Maurice May - Power Insights https://seekingalpha.com/article/69630-cleco-corporation-q4-2007-earnings-call-transcript 1/32 12/3/21, 12:48 PM Cleco Corporation Q4 2007 Earnings Call Transcript _ Seeking Alpha Patrick McGlinchey - Sidoti Robert Chewning - Daven…	1
185	41.pdf	IHOP Corporation (IHP) Q4 2007 Earnings Call February 27, 2008 11:00 AM ET	Michael Gallo – C.L. King Steven Rees – J.P. Morgan Amy Manilla – Cardinal Capital Management Jeff Rachet – RBC Investment Robert Guch – Mac Capital https://seekingalpha.com/article/66395-ihop-corporation-q4-2007-earnings-call-transcript 1/49 12/3/21, 12:49 PM IHOP Corporation Q4 2007 Earnings Call Transcript _ Seeking Alpha Mitch Spicer – Kelsey Advisory Doug Pardon – Brigade Capital Mike Smith …	1
186	42.pdf	Cell Genesys, Inc. (CEGE) Q4 2007 Earnings Call February 28, 2008 5:00 PM ET	Mark Monane – Needham Pamela Bassett - Cantor Fitzgerald Jeff Englander - Standard & Poor’s Operator Welcome to the Cell Genesys fourth quarter and 2007 year end conference call. (Operator Instructions) I would now like to turn the conference over to Ms Susan Ferris https://seekingalpha.com/article/69533-cell-genesys-inc-q4-2007-earnings-call-transcript 1/24 12/3/21, 12:50 PM Cell Genesys, Inc. Q…	1
187	43.pdf	Osiris Therapeutics, Inc. (NASDAQ:OSIR) Q4 2007 Earnings Call February 28, 2008 9:00 AM ET	Ruthanne Roussel - The Robins Group Bill Tanner - Leerink Swann Operator Before we begin I’d like to remind everyone that this conference may include forward- looking statements that involve uncertainties and risks. Actual results could differ materially from those anticipated in the forward-looking statements for many reasons, including the factors described in the section “Included Risk Factors…	0
188	44.pdf	Macdonald Dettwiler & Associates Ltd (MDA) Q4 2007 Earnings Call February 27, 2008	Jeff Rath – Canaccord Adams David Mcfadgen - Comark Securities Operator https://seekingalpha.com/article/66394-macdonald-dettwiler-and-associates-q4-2007-earnings-call-transcript 1/26 12/3/21, 12:51 PM MacDonald Dettwiler & Associates Q4 2007 Earnings Call Transcript _ Seeking Alpha Good afternoon ladies and gentlemen. Welcome to MDA’s preliminary fourth quarter 2007 results conference call. This…	1
189	45.pdf	BioMed Realty Trust Inc. (NYSE:BMR) Q4 2007 Earnings Call February 29, 2008 1:00 PM ET	Paul Puryear - Raymond James David Cohen - Morgan Stanley Jordan Sadler - KeyBanc Capital Markets Omotayo Okusanya - UBS John Guinee - Stifel Nicolaus Dave Aubuchon - Baird Chris Pike Merrill Lynch https://seekingalpha.com/article/66688-biomed-realty-trust-inc-q4-2007-earnings-call-transcript 1/42 12/3/21, 1:02 PM Chris Pike - Merrill Lynch BioMed Realty Trust Inc. Q4 2007 Earnings Call Transcrip…	1
190	46.pdf	Midas Inc. (NYSE:MDS) Q4 2007 Earnings Call February 28, 2008 11:00 AM ET Executives	Jim Barrett - Harte Hanks Vic Kumar Tim Griffith Operator Good day everyone and welcome to the Midas Incorporated fiscal year 2007 earnings call. Today’s call is being recorded. This conference is also being webcast by CCBN and can be accesses in the corporate news section of Midas’s website www.midas.com or https://seekingalpha.com/article/69728-midas-incorporated-q4-2007-earnings-call-transcrip…	1
191	47.pdf	Ferro Corp. (NYSE:FOE) Q4 2007 Earnings Call February 29, 2008 1:00 PM ET Executives	David Begleiter - Deutsche Bank Mike Sison - KeyBanc Robert Felice - Gabelli &Company Christopher Butler - Sidoti andCompany Operator Welcome to Ferro Corporation's2007 fourth quarter Earnings Call. All participants will be in listen only modeuntil the question and answer session (Operator Instruction) This https://seekingalpha.com/article/66684-ferro-corp-q4-2007-earnings-call-transcript 1/35 12…	1
192	48.pdf	Armstrong World Industries, Inc. (NYSE:AWI) Q4 2007 Earnings Call February 29, 2008 10:00 AM ET	Analysts John Baugh - Stifel Nicolaus Keith Hughes - Suntrust Robinson Humphrey Ben Wagner - Tellic Investments Bruce C Baughman - Franklin Advisory Service https://seekingalpha.com/article/66682-armstrong-world-industries-q4-2007-earnings-call-transcript 1/37 12/3/21, 1:05 PM Bruce C. Baughman Franklin Advisory Service Armstrong World Industries Q4 2007 Earnings Call Transcript _ Seeking Alpha A…	1
193	49.pdf	DiamondRock Hospitality Co. (NYSE:DRH) Q4 2007 Earnings Call February 29, 2008 10:00 AM ET	Analysts Jeff Donnelly – Wachovia William Marks – JMP Securities Amanda Bryant – Merrill Lynch David Loeb – Robert W Baird & Co https://seekingalpha.com/article/66681-diamondrock-hospitality-co-q4-2007-earnings-call-transcript 1/21 12/3/21, 1:05 PM David Loeb Robert W. Baird & Co. DiamondRock Hospitality Co. Q4 2007 Earnings Call Transcript _ Seeking Alpha Chris Woronka – Deutsche Bank Operator W…	0
194	5.FTI_Consulting,_Inc._Q4_2007_Earnings_Call_Transcript___Seeking_Alpha.pdf	FTI Consulting Inc. (NYSE:FCN) Q4 2007 Earnings Call February 28, 2008 5:30 PM ET	Jorge Celaya - EVP and CFO Dave Bannister - EVP and CDO Analyst Tobey Sommer - SunTrust Robinson Humphrey https://seekingalpha.com/article/66594-fti-consulting-inc-q4-2007-earnings-call-transcript 1/47 12/3/21, 10:39 AM FTI Consulting, Inc. Q4 2007 Earnings Call Transcript _ Seeking Alpha Arnie Ursaner- CJS Securities Brandt Sakakeeny - Deutsche Bank Andrew Fones - UBS Chris Agnew - Goldman Sachs…	0
195	50.pdf	Progressive Corporation (NYSE:PGR) Investor Relations Conference Call February 29, 2008 9:30 AM ET	Meyer Shields - Stifel Nicolaus Brian Meredith - UBS David Small - Bear Stearns David Hill - Bank of America William Wilt - Morgan Stanley Matt Heimermann - J.P. Morgan Tom Hazlehurst FPR https://seekingalpha.com/article/66680-progressive-corporation-investor-relations-call-transcript 1/30 12/3/21, 1:06 PM Tom Hazlehurst - FPR Progressive Corporation Investor Relations Call Transcript _ Seeking A…	0
196	51.pdf	Mirant Corporation (NYSE:MIR) Q4 2007 Earnings Call Transcript February 29, 2008 9:00 AM ET	John O’Neal – SVP, CCO Paul Gillespie – SVP of Tax Bill Holden – SVP, Treasurer Analysts Greg Orrill – Lehman Brothers https://seekingalpha.com/article/66679-mirant-corporation-q4-2007-earnings-call-transcript 1/33 12/3/21, 1:06 PM Greg Orrill Lehman Brothers Mirant Corporation Q4 2007 Earnings Call Transcript _ Seeking Alpha Elizabeth Parrella – Merrill Lynch Douglas Clifford – Omega Advisors Pa…	1
197	52.pdf	Southwestern Energy Co. (NYSE:SWN) Q4 2007 Earnings Call February 29, 2008 10:00 AM ET	Analysts Richard Tullis - Capital One Jason Gammel - Macquarie Capital David Snow - Energy Equities Brian Singer - Goldman Sachs https://seekingalpha.com/article/66677-southwestern-energy-co-q4-2007-earnings-call-transcript 1/36 12/3/21, 1:07 PM Brian Singer Goldman Sachs Southwestern Energy Co. Q4 2007 Earnings Call Transcript _ Seeking Alpha Tom Gardner - Simmons and Company Jeff Hayden - Pritc…	0
198	53.pdf	HMS Holdings Corp. (NASDAQ:HMSY) Q4 2007 Earnings Call February 29, 2008 10:00 AM ET	Charles Strauzer - CJS Securities Richard Close - Jefferies and Company Ivan Sachs - Ivan Sachs Equities Operator Good morning. My name is Carmen, and I will be your conference operator today. At this time, I would like to welcome everyone to the HMS Holdings Corporation fourth quarter and full year financial results conference call. (Operator Instructions) https://seekingalpha.com/article/66676-…	0
199	54.pdf	Interpublic Group of COS (NYSE:IPG) Q4 2007 Earnings Call February 29, 2008 8:30 AM ET	Analysts Alexia Quadrani – Bear Stearns John Janedis – Wachovia Capital Markets, LLC Paul Ginocchio – Deutsche Bank Securities Frederick Searby – JP Morgan https://seekingalpha.com/article/66675-interpublic-group-q4-2007-earnings-call-transcript 1/29 12/3/21, 1:09 PM Frederick Searby JP Morgan Interpublic Group Q4 2007 Earnings Call Transcript _ Seeking Alpha Troy Mastin – William Blair & Company…	1
200	55.pdf	HEICO Corp. (NYSE:HEI) F1Q08 (01/31/08) Earnings Call February 29, 2008 9:00 AM ET	Tom Irwin - EVP and CFO Analysts Arnie Ursaner - CJS Securities Tyler Hojo - Sidoti & Co. J B Groh - D A Davidson https://seekingalpha.com/article/66674-heico-corp-f1q08-01-31-08-earnings-call-transcript 1/24 12/3/21, 1:10 PM J.B. Groh D.A. Davidson HEICO Corp. F1Q08 (01/31/08) Earnings Call Transcript _ Seeking Alpha James Foung - Gabelli & Company Chris Donaghey - SunTrust Robinson Humphrey Ope…	0
201	56.pdf	Cogdell Spencer Inc. (NASDAQ:CSA-OLD) Q4 2007 Earnings Call February 29, 2008 10:00 AM ET	Analysts Rich Anderson - BMO Capital Markets Craig Melcher - Citigroup Karin Ford- Keybanc Capital Markets Stephanie Krewson - Janney Montgomery Scott Operator Hello and welcome to the Cogdell Spencer fourth quarter and year end 2007 conference https://seekingalpha.com/article/66673-cogdell-spencer-inc-q4-2007-earnings-call-transcript 1/18 12/3/21, 1:11 PM Cogdell Spencer Inc. Q4 2007 Earnings Ca…	0
202	57.pdf	PHH Corp. (NYSE:PHH) Q4 2007 Earnings Call February 29, 2008 10:00 AM ET Executives	Jordan Hymowitz - Philadelphia Financial Gabriel Kim - Wellington Management Ben Johnson - Goldman Sachs Marcelo Lima - Horn Eichenwald Operator https://seekingalpha.com/article/66672-phh-corp-q4-2007-earnings-call-transcript 1/27 12/3/21, 1:12 PM PHH Corp. Q4 2007 Earnings Call Transcript _ Seeking Alpha Good morning ladies and gentlemen. Welcome to the PHH Corporation 2007 Fourth Quarter and Ye…	0
203	58.pdf	Caraustar Industries Inc. (CSAR) Q4 2007 Earnings Call February 29, 2008 9:00 AM ET	Bruce Klein - Credit Suisse Unidentified Analyst Operator Good morning. At this time I would like to welcome everyone to the Caraustar Industries fourth quarter and full year 2007 financial results conference call. (Operator Instructions) I would now like to turn the call over to Mr. Bill Nix, Vice President of Finance and Chief https://seekingalpha.com/article/66671-caraustar-industries-inc-q4-2…	1
204	59.pdf	Warner Chilcott Ltd. (NASDAQ:WCRX) Q4 2007 Earnings Call February 29, 2008 8:00	Ken Trbovich – RBC Capital Dave Windley – Jeffries & Company [Adam Chang] – Deutsche Bank Operator At this time I would like to welcome everyone to Warner Chilcott’s Fourth Quarter and Full Year 2007 Financial Results Conference Call. [Operator Instructions] I would now like to turn the call over to Mr. Paul Herendeen, Executive Vice President and Chief Financial Officer of Warner Chilcott https:…	0
205	6-65616-vca-antech-inc-q4-2007-earnings-call-transcript.pdf	VCA Antech, Inc. (NASDAQ:WOOF-OLD) Q4 FY07 Earnings Call February 21, 2008 4:30 PM ET	Robert Mains - Morgan, Keegan & Co Dawn Brock - JP Morgan Operator Good day, and welcome everyone to the VCA Antech Fourth Quarter and Year end 2007 Earnings Results Conference Call and webcast. Before we commence this session I would like to preface the comments made today with a statement regarding forward-looking information. https://seekingalpha.com/article/65616-vca-antech-inc-q4-2007-earnin…	0
206	60.pdf	Westar Energy, Inc. (NYSE:WR) Q4 2007 Earnings Call February 29, 2008 10:00 AM ET	Services Analysts Tony Somma - Treasurer Greg Gordon – City Investment Research Michael Lapides – Goldman Sachs Rajeev Lalwani – J. P. Morgan Neil Kalton – Wachovia Capital Markets https://seekingalpha.com/article/66668-westar-energy-inc-q4-2007-earnings-call-transcript 1/19 12/3/21, 1:16 PM Westar Energy, Inc., Q4 2007 Earnings Call Transcript _ Seeking Alpha Hassan Doza – Loomis Sayles Scott In…	1
207	61.pdf	Universal Health Services Inc. (NYSE:UHS) Q4 2007 Earnings Call February 29, 2008 9:00 AM ET	Justine Lake - UBS Ken Weakley - UBS Darren Lehrich - Deutsche Bank Tom Gallucci - Merrill Lynch Christine Arnold - Morgan Stanley https://seekingalpha.com/article/66667-universal-health-services-inc-q4-2007-earnings-call-transcript 1/34 12/3/21, 1:17 PM Christine Arnold Morgan Stanley Universal Health Services Inc. Q4 2007 Earnings Call Transcript _ Seeking Alpha Erik Chiprich - BMO Capital Mark…	1
208	62.pdf	EpiCept Corporation (OTC:EPCT) Q4 2007 Earnings Call February 29, 2008 9:00 AM ET	Dileep Bhagwat - SVP Pharmaceutical Development At this time, I would like to welcome everyone to the EpiCept Fourth Quarter and Year end 2007 Earnings Call. All lines have been placed on mute to prevent any background noise. After the speaker's remarks there will be a question and answer period. (Operator Instructions) It is now my pleasure to turn the floor over to your host, Greg Kelley. Sir, …	0
209	63.pdf	Integra LifeSciences Holdings Corp. (NASDAQ:IART) Q4 2007 Earnings Call March 1, 2007 9:00 AM ET	conference call. (Operator Instructions) At this time, I would like to turn the call over to your host, Mr. Stuart Essig, President and Chief Executive Officer. Please go ahead, sir. Stuart Essig Thank you. Good morning, everyone, and thank you for joining us for the Integra LifeSciences fourth quarter 2007 conference call. I am Stuart Essig, President and Chief Executive Officer of Integra LifeS…	0
210	64.pdf	U-Store-It Trust (YSI) F4Q08 Earnings Call February 29, 2008 11:00 AM ET	Craig Melcher - Citi Michael Knott - Green Street Advisor Eric Rothman - Urdang Securities Paula Poskon - Robert W. Baird https://seekingalpha.com/article/69635-u-store-it-trust-f4q08-qtr-end-12-31-07-earnings-call-transcript 1/28 12/4/21, 9:14 AM U-Store-It Trust F4Q08 (Qtr End 12/31/07) Earnings Call Transcript _ Seeking Alpha David Toti - Lehman Brothers Chris Pike - Merrill Lynch Christeen Ki…	0
211	65.pdf	Ashford Hospitality Trust (NYSE:AHT) Q4 2007 Earnings Call February 28, 2008 11:00 AM ET	Harry Sullivan – Senior Vice President and Principal of Corporate Communications Inc. Analysts Jeffrey Donnelly - Wachovia Patrick Scholes - JP Morgan Michael Salinsky - RBC Capital Markets https://seekingalpha.com/article/69633-ashford-hospitality-trust-q4-2007-earnings-call-transcript 1/33 12/4/21, 9:15 AM Michael Salinsky RBC Capital Markets Ashford Hospitality Trust Q4 2007 Earnings Call Tran…	0
212	66.pdf	Move, Inc. (NASDAQ:MOVE-OLD) Q4 2007 Earnings Call February 28, 2008 5:00 PM ET	Jason Helfstein – Oppenheimer & Co. Jeetil Patel – Deutsche Bank Securities William Morrison – ThinkEquity Operator Good day and welcome to the fourth quarter and full year 2007 Move Inc. earnings conference call. My name is Audrina and I’ll be your coordinator for today. At this time all participants are in a listen only mode. We will be facilitating a question-and-answer session towards the end…	1
213	67.pdf	Sonus Networks, Inc. (SONS) Q4 2007 Earnings Call February 28, 2008 4:45 PM ET Executives	Subu Subrahmanyan - Sanders Morris Paul Silverstein - Credit Suisse Edward Jackson - Cantor Fitzgerald Kenneth Muth - Robert Baird James - Jefferies Operator https://seekingalpha.com/article/66597-sonus-networks-inc-q4-2007-earnings-call-transcript 1/34 12/4/21, 9:17 AM Sonus Networks, Inc. Q4 2007 Earnings Call Transcript _ Seeking Alpha Ladies and gentlemen, thank you for standing by. And welco…	0
214	68.pdf	Sonus Networks, Inc. (SONS) Q4 2007 Earnings Call February 28, 2008 4:45 PM ET Executives	Subu Subrahmanyan - Sanders Morris Paul Silverstein - Credit Suisse Edward Jackson - Cantor Fitzgerald Kenneth Muth - Robert Baird James - Jefferies Operator https://seekingalpha.com/article/66597-sonus-networks-inc-q4-2007-earnings-call-transcript 1/34 12/4/21, 9:17 AM Sonus Networks, Inc. Q4 2007 Earnings Call Transcript _ Seeking Alpha Ladies and gentlemen, thank you for standing by. And welco…	0
215	69.pdf	China Medical Technologies, Inc. (CMED) F3Q07 Earnings Call February 28, 2008 8:00 Xiaodong Wu - Chairman of the Board, Chief Executive Officer	Jinsong Du - Credit Suisse David Ginter - Oak Ridge Financial Luke Langford - Langford Capital Management Operator Good day, ladies and gentlemen and welcome to the Q3 2007 China Medical Technologies Incorporated earnings conference call. (Operator Instructions) I would now like to turn the call over to Ms. Winnie Fan. Please proceed, Ms. Fan. https://seekingalpha.com/article/66596-china-medical-…	1
216	7-65615-reliance-steel-and-aluminum-co-q4-2007-earnings-call-transcript.pdf	Reliance Steel & Aluminum Co. (NYSE:RS) Q4 FY07 EarningsCall February 21, 2008 11:00 AM ET	Analysts Paul D'Amico - TD Newcrest Evan Steen - Eos Partners Mark Parr - KeyBanc Capital Markets Michelle Applebaum - Applebaum Research https://seekingalpha.com/article/65615-reliance-steel-and-aluminum-co-q4-2007-earnings-call-transcript 1/37 12/3/21, 10:56 AM Michelle Applebaum Applebaum Research Reliance Steel & Aluminum Co. Q4 2007 Earnings Call Transcript | Seeking Alpha Timna Tanners - UB…	0
217	70.pdf	UTStarcom, Inc. (NASDAQ:UTSI) Q4 2007 Earnings Call February 28, 2008 5:00 PM ET	Analysts Hamed Khorsand - BWS Financial [Andrew Rosenberg] - Prince Asset Management Velin Mezinev - Donald Smith & Company [Chernin Waters] – Crowell Weedon https://seekingalpha.com/article/68923-utstarcom-inc-q4-2007-earnings-call-transcript 1/26 12/4/21, 9:19 AM [Chernin Waters] Crowell, Weedon UTStarcom, Inc. Q4 2007 Earnings Call Transcript _ Seeking Alpha Himanshu Shah - Shah Capital I woul…	0
218	71.pdf	Novellus Systems Inc. (NASDAQ:NVLS-OLD) Q1 FY08 Mid-Quarter Earnings Call Transcript February 28, 2008 5:30 PM ET	Jagdish Iyer - UBS CJ Muse - Lehman Brothers Mahesh Sanganeria - RBC Capital Markets Benedict Pang - Caris and Company William Ong - American Technology Research Timothy Summers - Stanford Group Company Atif Malik Morgan Stanley https://seekingalpha.com/article/66595-novellus-systems-inc-f1q08-mid-quarter-earnings-call-transcript 1/15 12/4/21, 9:19 AM Novellus Systems Inc. F1Q08 Mid-Quarter Earni…	0
219	72.pdf	FTI Consulting Inc. (NYSE:FCN) Q4 2007 Earnings Call February 28, 2008 5:30 PM ET	Jorge Celaya - EVP and CFO Dave Bannister - EVP and CDO Analyst Tobey Sommer - SunTrust Robinson Humphrey https://seekingalpha.com/article/66594-fti-consulting-inc-q4-2007-earnings-call-transcript 1/47 12/4/21, 9:20 AM FTI Consulting, Inc. Q4 2007 Earnings Call Transcript _ Seeking Alpha Arnie Ursaner- CJS Securities Brandt Sakakeeny - Deutsche Bank Andrew Fones - UBS Chris Agnew - Goldman Sachs …	0
220	73.pdf	Parker Drilling Company (PKD) Q4 2007 Earnings Call February 26, 2008 10:00 AM ET Executives	Steve Ferazani - Sidoti & Company [George Berman - Glen Allen Financial] David Wilson Bruce Galloway - Galloway Capital Frank Bisk - Pilot Advisors Operator https://seekingalpha.com/article/66593-parker-drilling-company-q4-2007-earnings-call-transcript 1/22 12/4/21, 9:20 AM Parker Drilling Company Q4 2007 Earnings Call Transcript _ Seeking Alpha Ladies and gentlemen welcome to the Parker Drilling…	1
221	74.pdf	Stratasys, Inc. (NASDAQ:SSYS) Q4 2007 Earnings Call February 26, 2008 8:30 AM ET	Troy Jensen - Piper Jaffray Jeff Rosenberg - William Blair Eric Martinuzzi - Craig-Hallum [Ryan Thibodeaux] - Maple Leaf Partners https://seekingalpha.com/article/66591-stratasys-inc-q4-2007-earnings-call-transcript 1/31 12/4/21, 9:21 AM Stratasys, Inc. Q4 2007 Earnings Call Transcript _ Seeking Alpha [Graham Raine] - Bear [Stearns] Capital Jeff Evanson - Dougherty & Company [Amit Kamat] -Capital…	0
222	75.pdf	LodgeNet Interactive Corp. (OTC:LNET) Q4 2007 Earnings Call February 20, 2008 5:00 PM ET	Lucas Binder – UBS Marshall Levine – Knott Partners Ben Vadinsky – Bear, Stearns Jeff Bronchick – RCB Investment Management Operator Good afternoon. At this time I would like to welcome everyone to the fourth quarter 2007 earnings conference call. (Operator Instructions) At this time I would like to turn the https://seekingalpha.com/article/66590-lodgenet-interactive-corp-q4-2007-earnings-call-tr…	1
223	76.pdf	McGrath RentCorp (NASDAQ:MGRC) Q4 2007 Earnings Call February 21, 2008 5:00 PM ET	Analysts David Gold - Sidoti Amy Ruderman - Oppenheimer & Company Jamie Sullivan - RBC Capital Markets Joe Real - Baker Brook Capital https://seekingalpha.com/article/66589-mcgrath-rentcorp-q4-2007-earnings-call-transcript 1/30 12/4/21, 9:22 AM Joe Real Baker Brook Capital McGrath RentCorp Q4 2007 Earnings Call Transcript | Seeking Alpha Alan Mitrani - Sylvan Lake Asset Management Good afternoon …	0
224	77.pdf	Kohl’s Corp. (NYSE:KSS) Q4 2007 Earnings Call February 28, 2008 5:00 PM ET	Adrianne Shapira - Goldman Sachs Liz Dunn - Thomas Weisel David Glick - Buckingham Research Dan Binder – Jefferies https://seekingalpha.com/article/66586-kohl-s-q4-2007-earnings-call-transcript 1/19 12/4/21, 9:23 AM Kohl’s Q4 2007 Earnings Call Transcript _ Seeking Alpha Dana Telsey - Telsey Advisory Group Bob Drbul - Lehman Brothers Dana Cohen - Banc of America Securities Operator Statements mad…	0
225	78.pdf	Guidance Software Inc. (NASDAQ:GUID) Q4 2007 Earnings Call February 28, 2008 5:00 PM ET	Matt Bugarin - Raymond James Kevin Buttigieg - Stanford Group Mark Schappel - Benchmark Jonathan Ruykhaver - ThinkEquity Partners Josh Jabs - Roth Capital Israel Hernandez - Lehman Brothers Operator https://seekingalpha.com/article/66584-guidance-software-inc-q4-2007-earnings-call-transcript 1/25 12/4/21, 9:23 AM Operator Guidance Software Inc. Q4 2007 Earnings Call Transcript | Seeking Alpha Goo…	0
226	79.pdf	Novell Inc. (NASDAQ:NOVL) F1Q08 (Qtr End 01/31/08) Earnings Call February 28, 2008 5:00 PM ET	Aaron Schwartz - JPMorgan James Gilman - Cross Research Katherine Egbert - Jefferies Dana Russell Brent William - The Benchmark Company John Walsh - Citi Terry Tillman Suntrust Robinson https://seekingalpha.com/article/66580-novell-inc-f1q08-qtr-end-01-31-08-earnings-call-transcript 1/34 12/4/21, 9:23 AM Novell Inc. F1Q08 (Qtr End 01/31/08) Earnings Call Transcript | Seeking Alpha Terry Tillman -…	0
227	8-carpenter_Technology_Corp._F2Q08_(Qtr._End_12_31_07)_Earnings_Call_Transcr.pdf	Carpenter Technology Corporation (NYSE:CRS) Q2 FY08 Earnings Call January 29, 2008 10:00 AM ET	Analysts Chris Olin - Cleveland Research Brian Yu - Citigroup Luke Folta - Longbow Research Sanil Daptardar - Sentinel Asset Management Timothy Hayes - Davenport & Company Mark L Parr KeyBanc Capital Markets https://seekingalpha.com/article/65614-carpenter-technology-corp-f2q08-qtr-end-12-31-07-earnings-call-transcript 1/27 12/3/21, 10:57 AM Carpenter Technology Corp. F2Q08 (Qtr. End 12/31/07) Ea…	0
228	80.pdf	Gap Inc. (NYSE:GPS) Q4 2007 Earnings Call February 28, 2008 5:00 PM ET	Lauren Levitan - Cowen and Company Barbara Wyckoff - Buckingham Research Kimberly Greenberger - Citigroup Paul Lejuez - Credit Suisse https://seekingalpha.com/article/66578-gap-inc-q4-2007-earnings-call-transcript 1/30 12/4/21, 9:24 AM Gap Inc. Q4 2007 Earnings Call Transcript | Seeking Alpha Janet Kloppenburg - JJK Research Dana Telsey - Telsey Advisory Group John Morris - Wachovia Securities Je…	1
229	81.pdf	Entravision Communications Corp. (NYSE:EVC) Q4 2007 Earnings Call February 28, 2008 5:00 PM ET	Analysts Victor Miller - Bear Stearns David Miller - SMH Capital Markets Lee Westerfield - BMO Capital Marci Ryvicker - Wachovia Securities https://seekingalpha.com/article/66576-entravision-communications-corp-q4-2007-earnings-call-transcript 1/20 12/4/21, 9:24 AM Marci Ryvicker Wachovia Securities Entravision Communications Corp. Q4 2007 Earnings Call Transcript _ Seeking Alpha Operator Ladies …	0
230	82.pdf	Entravision Communications Corp. (NYSE:EVC) Q4 2007 Earnings Call February 28, 2008 5:00 PM ET	Analysts Victor Miller - Bear Stearns David Miller - SMH Capital Markets Lee Westerfield - BMO Capital Marci Ryvicker - Wachovia Securities https://seekingalpha.com/article/66576-entravision-communications-corp-q4-2007-earnings-call-transcript 1/20 12/4/21, 9:25 AM Marci Ryvicker Wachovia Securities Entravision Communications Corp. Q4 2007 Earnings Call Transcript _ Seeking Alpha Operator Ladies …	0
231	83.pdf	BEA Systems Inc. (BEAS) F4Q08 (Qtr End 1/31/08) Earnings Call February 28, 2008 5:00 PM ET	all participants will be in a listen-only mode and today's conference call is being recorded. Now, I would like to turn the call over to Kevin Faulkner, BEA's Senior Vice President of Investor Relations. Please go ahead, sir Kevin Faulkner Thank you, Michael. Good afternoon, ladies and gentlemen, and thank you for joining us as we discussed BEA Systems, Inc. results for the fourth quarter and fis…	0
232	84.pdf	Dell Inc. (DELL-OLD) F4Q08 Earnings Call February 28, 2008 5:00 PM ET Executives	Richard Gardner - Citigroup Andrew Neff - Bear Stearns Toni Sacconaghi - Sanford C. Bernstein Louis Miscioscia - Cowen & Company Kathryn Huberty - Morgan Stanley Keith Bachman - Bank of Montreal https://seekingalpha.com/article/66574-dell-f4q08-qtr-end-2-1-08-earnings-call-transcript 1/29 12/4/21, 9:30 AM Dell F4Q08 (Qtr End 2/1/08) Earnings Call Transcript _ Seeking Alpha David Bailey - Goldman …	0
233	85.pdf	Comfort Systems USA Q4 2007 Earnings Call February 28, 2008 11:00 AM ET	Matt Duncan – Stephens, Inc David Yuschak - SMH Capital Terrence McMahon – BCS Partners Tahira Afzal – Keybanc https://seekingalpha.com/article/69915-comfort-systems-usa-q4-2007-earnings-call-transcript 1/29 12/4/21, 9:30 AM Comfort Systems USA, Q4 2007 Earnings Call Transcript _ Seeking Alpha Barry Haimes – Sage Asset Management Rich Wesolowski – Sidoti & Company Good day ladies and gentlemen an…	0
234	86.pdf	Freddie Mac (FRE) Q4 2007 Earnings Call February 28, 2008 1:00 PM ET Executives	Brad Ball – Citi Howard Shapiro – FPK Eric Wasserstrom – UBS Moshe Orenbuch – Credit Suisse Kenneth Posner – Morgan Stanley Analyst for Paul Miller – Friedman, Billings, Ramsey https://seekingalpha.com/article/66573-freddie-mac-q4-2007-earnings-call-transcript 1/34 12/4/21, 9:31 AM Freddie Mac Q4 2007 Earnings Call Transcript | Seeking Alpha Bruce Harting – Lehman Brothers Robert Lacoursiere – Ba…	0
235	87.pdf	Cooper Tire & Rubber Company (CTB) F4Q07 Earnings Call February 28, 2008 11:00 AM ET	Rod Lache - Deutsche Bank Himanshu Patel - JP Morgan John Murphy - Merrill Lynch Jonathan Steinmetz - Morgan Stanley Kurt Budeck Operator Saul Ludwig - KeyBanc Capital Markets https://seekingalpha.com/article/66571-cooper-tire-and-rubber-f4q07-qtr-end-12-29-07-earnings-call-transcript 1/35 12/4/21, 9:31 AM Operator Cooper Tire &amp; Rubber F4Q07 (Qtr End 12/29/07) Earnings Call Transcript _ Seeki…	0
236	88.pdf	Whiting Petroleum Corp. (NYSE:WLL) Q4 2007 Earnings Call February 28, 2008 11:00	Analysts Scott Hanold - RBC Capital Markets Wayne Andrews - Raymond James Jeff Robertson - Lehman Brothers Jim Busoni - Northern Webster Operator https://seekingalpha.com/article/66560-whiting-petroleum-corp-q4-2007-earnings-call-transcript 1/31 12/4/21, 9:32 AM Whiting Petroleum Corp. Q4 2007 Earnings Call Transcript | Seeking Alpha Good day, ladies and gentlemen, and welcome to the fourth quart…	1
237	89.pdf	W&T Offshore, Inc. (NYSE:WTI) Q4 2007 Earnings Call February 28, 2008 10:30 AM ET	Tracy W. Krohn - Founder, Chairman, Chief Executive Officer and President J. Daniel Gibbons - Senior Vice President and Chief Financial Officer Stephen L. Schroeder - Senior Vice President and Chief Operating Officer Clifford J. Williams - Vice President, Reservoir Engineering Jeffrey M. Durrant - Senior Vice President Exploration and Senior Vice President https://seekingalpha.com/article/66556-w…	0
238	9-Harris_Corp._F2Q08_(Qtr._End_12_31_07)_Earnings_Call_Transcript___Seeking_.pdf	Harris Corporation (HRS) Q2 FY08 Earnings Call January 30, 2008 4:30 PM ET Executives	James Mcilree - Collins Stewart Llc Joseph Nadol - J.P. Morgan Operator Good afternoon and welcome to the Harris Corporation’s Second Quarter Earnings Release Conference Call. This call is being recorded. Beginning today's meeting is Ms. Pamela Padgett, Vice President of Investor Relations and Corporate Communications. Please go ahead ma’am. https://seekingalpha.com/article/65613-harris-corp-f2q0…	0
239	90.pdf	Big 5 Sporting Goods Corp. (NASDAQ:BGFV) Q4 2007 Earnings Call February 28, 2008 5:00 PM ET	Brian Nagel – UBS Ralph Jean – Wachovia John Shanley - Susquehanna David Magee - SunTrust Robinson Humphrey Rick Nelson – Stephens https://seekingalpha.com/article/69721-big-5-sporting-goods-q4-2007-earnings-call-transcript 1/23 12/4/21, 9:33 AM Rick Nelson Stephens Big 5 Sporting Goods Q4 2007 Earnings Call Transcript _ Seeking Alpha Anthony Lebiedzinski – Sidoti & Co. Operator Good day ladies a…	0
240	91.pdf	XM Satellite Radio Holdings Inc. (XMSR) Q4 2007 Earnings Call February 28, 2008 10:00 AM ET	Gary M. Parsons - Chairman of the Board Steve Cook - Executive Vice President, Automotive Marketing Analysts Robert S. Peck - Bear Stearns David Bank - RBC Capital Markets https://seekingalpha.com/article/66553-xm-satellite-radio-q4-2007-earnings-call-transcript 1/29 12/4/21, 9:34 AM David Bank RBC Capital Markets XM Satellite Radio Q4 2007 Earnings Call Transcript | Seeking Alpha Analyst for Vij…	0
241	92.pdf	DynCorp International Inc (DCP-OLD) F3Q08 Earnings Call January 31, 2008 8:30 AM ET	Lionel Jolivot - Bank of America Myles Walton - Oppenheimer & Co. James Harlow - Stifel Nicolaus & Company, Inc. Louise Wager - Commerce Bank Mike [Marionacci] - [inaudible] Rock Capital Matt Vittorioso - Barclays Capital https://seekingalpha.com/article/66307-dyncorp-international-inc-f3q08-qtr-end-12-28-07-earnings-call-transcript 1/29 12/4/21, 9:35 AM DynCorp International Inc F3Q08 (Qtr End 1…	0
242	93.pdf	InnerWorkings, Inc. (NASDAQ:INWK) Q4 2007 Earnings Call February 21, 2008 5:30 PM ET	Franco Turrinelli - William Blair Randy Hugen - Piper Jaffray Yousseff Squali - Jefferies Lev Polinsky – JP Morgan Operator Good day, everyone and welcome everyone to the InnerWorkings, Inc. fourth quarter and fiscal year 2007 earnings conference call. (Operator Instructions) At this time I https://seekingalpha.com/article/66306-innerworkings-inc-q4-2007-earnings-call-transcript 1/24 12/4/21, 9:3…	0
243	94.pdf	MarineMax, Inc. (NYSE:HZO) F1Q08 Earnings Call February 7, 2008 10:00 AM ET Executives	Steven Reese – JP Morgan Laura Richardson – BB&T Capital Markets John Marlow – [Inaudible] Dustin Waide – Wedge Capital Management Anthony Lebiedzinski – Sidoti & Company Operator https://seekingalpha.com/article/66305-marinemax-f1q08-qtr-end-12-31-07-earnings-call-transcript 1/23 12/4/21, 9:36 AM MarineMax F1Q08 (Qtr End 12/31/07) Earnings Call Transcript _ Seeking Alpha Good day everyone and we…	0
244	95.pdf	Lifecell Corporation (LIFC) Q4 2007 Earnings Call February 27, 2008 10:00 AM ET	Matt Dolan - Roth Capital Caroline Corner - Pacific Growth Equities Jayson Bedford - Raymond James Steven Lichtman - Banc of America Securities Greg Brash - Sidoti & Company Mark Mullikin Piper Jaffray https://seekingalpha.com/article/69229-lifecell-corporation-q4-2007-earnings-call-transcript 1/31 12/4/21, 9:37 AM Mark Mullikin - Piper Jaffray. Lifecell Corporation Q4 2007 Earnings Call Transcri…	0
245	96.pdf	CBRL Group, Inc. (NASDAQ:CBRL) F2Q08 Earnings Call February 26, 2008 11:00 AM ET	Analysts Bryan Elliott – Raymond James Steven Rees – J.P. Morgan Chris O’Cull – Suntrust Robinson Humphrey Brad Ludington – Keybank Capital Markets https://seekingalpha.com/article/66292-cbrl-group-inc-f2q08-qtr-end-02-01-08-earnings-call-transcript 1/23 12/4/21, 9:38 AM Brad Ludington Keybank Capital Markets CBRL Group, Inc. F2Q08 (Qtr End 02/01/08) Earnings Call Transcript _ Seeking Alpha Conra…	0
246	97.pdf	Pennsylvania R.E.I.T. (NYSE:PEI) Q4 2007 Earnings Call February 26, 2008 3:00 PM ET	Analysts Ambika Goel – Citi Investment Research Craig Schmidt – Merrill Lynch Nathan Isbee – Stifel Nicolaus Michael Mueller – J.P. Morgan Matt Ostrower – Morgan Stanley Ryan Bennett Lehman Brothers https://seekingalpha.com/article/66291-pennsylvania-r-e-i-t-q4-2007-earnings-call-transcript 1/28 12/4/21, 9:38 AM Pennsylvania R.E.I.T. Q4 2007 Earnings Call Transcript | Seeking Alpha Ryan Bennett –…	0
247	98.pdf	Autodesk, Inc. (NASDAQ:ADSK) F4Q08 Earnings Call February 26, 2008 5:00 PM ET	Philip Winslow – Credit Suisse Jay Vleeschhouwer – Merrill Lynch Heather Bellini – UBS Andrew Matorin - Bear Stearns https://seekingalpha.com/article/66284-autodesk-f4q08-quarter-end-1-31-2008-earnings-call-transcript 1/30 12/4/21, 9:39 AM Autodesk F4Q08 (Quarter End 1/31/2008) Earnings Call Transcript _ Seeking Alpha A. Sasa Zorovic - Goldman Sachs Steven M. Ashley - Robert W. Baird Brent Thill …	0
248	99.pdf	Autodesk, Inc. (NASDAQ:ADSK) F4Q08 Earnings Call February 26, 2008 5:00 PM ET Executives	Heather Bellini – UBS Andrew Matorin - Bear Stearns A. Sasa Zorovic - Goldman Sachs Steven M. Ashley - Robert W. Baird Brent Thill – Citigroup Brendan Barnicle – Pacific Crest Securities https://seekingalpha.com/article/66284-autodesk-f4q08-quarter-end-1-31-2008-earnings-call-transcript 1/30 12/4/21, 9:39 AM Autodesk F4Q08 (Quarter End 1/31/2008) Earnings Call Transcript | Seeking Alpha Richard D…	0
249	1.pdf	Genocea Biosciences, Inc. (NASDAQ:GNCA) Q4 2018 Results Earnings Conference Call February 28, 2019 9:00 AM ET	Chip Clark - President and CEO Jessica Flechtner - Chief Scientific Officer Tom Davis - Chief Medical Officer Conference Call Participants Gil Blum - Needham and Company https://seekingalpha.com/article/4245229-genocea-biosciences-inc-s-gnca-ceo-chip-clark-on-q4-2018-results-earnings-call-transcript 1/10 12/4/21, 6:54 PM Genocea Biosciences, Inc.'s (GNCA) CEO Chip Clark on Q4 2018 Results - Earni…	0
250	10.pdf	Sarepta Therapeutics, Inc. (NASDAQ:SRPT) Q4 2018 Results Earnings Conference Call February 27, 2019 8:30 AM ET	Douglas Ingram - President and Chief Executive Officer Sandy Mahatme - Executive Vice President, Chief Financial Officer and Chief Business Officer Bo Cumbo - Senior Vice President and Chief Commercial Officer Gilmore O'Neill - Senior VP of R&D and Chief Medical Officer Louise Rodino-Klapac - Vice President, Gene Therapy https://seekingalpha.com/article/4245075-sarepta-therapeutics-inc-srpt-ceo-d…	0
251	11.pdf	Bilibili, Inc. (NASDAQ:BILI) Q4 2018 Earnings Conference Call February 27, 2019 8:00 PM ET	Thomas Chong - Crédit Suisse Alex Yao - JPMorgan Chase & Co. Alex Poon - Morgan Stanley Hillman Chan - Citigroup Operator Carly Li - Vice Chairman, Board of Directors & COO https://seekingalpha.com/article/4245073-bilibili-inc-bili-ceo-rui-chen-on-q4-2018-results-earnings-call-transcript 1/19 12/4/21, 6:56 PM Bilibili, Inc. (BILI) CEO Rui Chen on Q4 2018 Results - Earnings Call Transcript _ Seeki…	0
252	12.pdf	FibroGen, Inc. (NASDAQ:FGEN) Q4 2018 Earnings Conference Call February 27, 2019 5:00 PM ET	Thomas Neff - Founder, Chairman & CEO Peony Yu - Chief Medical Officer Christine Chung - SVP, China Operations Elias Kouchakji - SVP Clinical Development, Drug Safety & Pharmacovigilance Pat Cotroneo - CFO https://seekingalpha.com/article/4245071-fibrogen-inc-fgen-ceo-thomas-neff-on-q4-2018-results-earnings-call-transcript 1/30 12/4/21, 6:56 PM FibroGen, Inc. (FGEN) CEO Thomas Neff on Q4 2018 Res…	0
253	13.pdf	Box Inc. (NYSE:BOX) Q4 2019 Earnings Conference Call February 27, 2019 5:00 PM ET	Alice Lopatto - Head, IR Aaron Levie - CEO Dylan Smith - CFO Conference Call Participants Philip Winslow - Wells Fargo Ted Lin - Goldman Sachs Mike Casado - KeyBanc Capital Markets https://seekingalpha.com/article/4245070-box-inc-s-box-ceo-aaron-levie-on-q4-2019-results-earnings-call-transcript 1/36 12/4/21, 6:57 PM Box Inc.'s (BOX) CEO Aaron Levie on Q4 2019 Results - Earnings Call Transcript _ …	0
254	14.pdf	National Bank of Canada (OTCPK:NTIOF) Q1 2019 Results Earnings Conference Call February 27, 2019 1:00 PM ET	Louis Vachon - President and CEO Ghislain Parent - CFO Bill Bonnell - CRO Laurent Ferreira - EVP and Co-Head, Financial Markets Lucie Blanchet - Co-Head of P&C Banking https://seekingalpha.com/article/4245067-national-bank-of-canada-ntiof-ceo-louis-vachon-on-q1-2019-results-earnings-call-transcript 1/29 12/4/21, 6:58 PM National Bank of Canada (NTIOF) CEO Louis Vachon on Q1 2019 Results - Earning…	0
255	15.pdf	Liberty Global, Inc. (NASDAQ:LBTYA) Q4 2018 Results Earnings Conference Call February 27, 2019 5:00 PM ET	Mike Fries - CEO Charlie Bracken - EVP and CFO Thomas Mockridge - CEO, Virgin Media Andrea Salvato - Conference Call Participants Nick Lyall - Societe Generale https://seekingalpha.com/article/4245064-liberty-global-inc-lbtya-ceo-mike-fries-on-q4-2018-results-earnings-call-transcript 1/30 12/4/21, 6:59 PM Liberty Global, Inc. (LBTYA) CEO Mike Fries on Q4 2018 Results - Earnings Call Transcript _ …	0
256	16.pdf	Square, Inc. (NYSE:SQ) Q4 2018 Earnings Conference Call February 27, 2019 5:00 PM ET	Jason Lee - Head of Investor Relations Jack Dorsey - Chief Executive Officer Amrita Ahuja - Chief Financial Officer Conference Call Participants Darrin Peller - Wolfe Research Bryan Keane - Deutsche Bank https://seekingalpha.com/article/4245063-square-inc-sq-ceo-jack-dorsey-on-q4-2018-results-earnings-call-transcript 1/32 12/4/21, 6:59 PM Square, Inc. (SQ) CEO Jack Dorsey on Q4 2018 Results - Ear…	0
257	17.pdf	Cross Country Healthcare, Inc. (NASDAQ:CCRN) Q4 2018 Results Earnings Conference Call February 27, 2019 5:00 PM ET	Kevin Clark - President & CEO Conference Call Participants A.J. Rice - Credit Suisse Jason Plagman - Jefferies Tobey Sommer - SunTrust https://seekingalpha.com/article/4245062-cross-country-healthcare-inc-ccrn-ceo-kevin-clark-on-q4-2018-results-earnings-call-transcript 1/28 12/4/21, 6:59 PM Cross Country Healthcare, Inc. (CCRN) CEO Kevin Clark on Q4 2018 Results - Earnings Call Transcript _ Seeki…	1
258	18.pdf	Ladder Capital Corp (NYSE:LADR) Q4 2018 Earnings Conference Call February 27, 2019 5:00 PM ET	Company Participants Brian Harris - CEO Marc Fox - CFO Conference Call Participants Steve DeLaney - JMP Securities Jade Rahmani - KBW https://seekingalpha.com/article/4245061-ladder-capital-corp-ladr-ceo-brian-harris-on-q4-2018-results-earnings-call-transcript 1/27 12/4/21, 7:00 PM Ladder Capital Corp (LADR) CEO Brian Harris on Q4 2018 Results - Earnings Call Transcript _ Seeking Alpha Stephen La…	0
259	19.pdf	Elastic (NYSE:ESTC) Q3 2019 Earnings Conference Call February 27, 2019 5:00 PM Play Earnings Call	Mark Murphy - JP Morgan Raimo Lenschow - Barclays John DiFucci - Jefferies Heather Bellini - Goldman Sachs Kash Rangan - Bank of America/Merrill Lynch Matt Hedberg - RBC Capital Markets https://seekingalpha.com/article/4245060-elastic-estc-ceo-shay-banon-on-q3-2019-results-earnings-call-transcript 1/28 12/4/21, 7:00 PM Elastic (ESTC) CEO Shay Banon on Q3 2019 Results - Earnings Call Transcript _ …	0
260	2.pdf	Oxford Square Capital Corp. (NASDAQ:OXSQ) Q4 2018 Earnings Conference Call February 28, 2019 9:00 AM ET	Jonathan Cohen - Chief Executive Officer Bruce Rubin - Chief Financial Officer Kevin Yonon - Managing Director of Portfolio Manager Debdeep Maji - Lead Portfolio Manager for CLO and Tranche Investments Conference Call Participants Mickey Schleien - Ladenburg https://seekingalpha.com/article/4245222-oxford-square-capital-corp-oxsq-ceo-jonathan-cohen-on-q4-2018-results-earnings-call 1/10 12/4/21, 6…	0
261	20.pdf	Carvana Co. (NYSE:CVNA) Q4 2018 Earnings Conference Call February 27, 2019 5:30 AM ET	Michael Levin - VP of IR Ernest Garcia - President and CEO Mark Jenkins - CFO Conference Call Participants Zachary Fadem - Wells Fargo Sharon Zackfia - William Blair https://seekingalpha.com/article/4245058-carvana-co-cvna-ceo-ernest-garcia-on-q4-2018-results-earnings-call-transcript 1/36 12/4/21, 7:00 PM Carvana Co. (CVNA) CEO Ernest Garcia on Q4 2018 Results - Earnings Call Transcript _ Seeking…	0
262	21.pdf	Triton International Limited (NYSE:TRTN) Q1 2019 Earnings Conference Call April 30, 2019 8:00 AM ET	John Burns - CFO Brian Sondey - CEO Conference Call Participants Scott Valentin - Compass Point Michael Brown - KBW John O'Callaghan - Head of Marketing and Operations https://seekingalpha.com/article/4258031-triton-international-limited-trtn-ceo-brian-sondey-on-q1-2019-results-earnings-call 1/24 12/4/21, 7:02 PM Triton International Limited (TRTN) CEO Brian Sondey on Q1 2019 Results - Earnings C…	0
263	22.pdf	Standard Chartered PLC (OTCPK:SCBFF) Q1 2019 Earnings Conference Call April 30, Andrew Halford - Group Chief Financial Officer & Director	Chris Manners - Barclays Manus Costello - Autonomous Fahed Kunwar - Redburn Tom Rayner - Numis Robert Sage - Macquarie James Invine - Societe Generale https://seekingalpha.com/article/4258028-standard-chartered-plc-scbff-q1-2019-results-earnings-call-transcript 1/22 12/4/21, 7:03 PM Standard Chartered PLC (SCBFF) Q1 2019 Results - Earnings Call Transcript _ Seeking Alpha Gurpreet Sahi - Goldman S…	0
264	23.pdf	Oxford Square Capital Corp. (NASDAQ:OXSQ) Q1 2019 Results Earnings Conference Call April 30, 2019 9:00 AM ET	Saul Rosenthal - President Bruce Rubin - CFO Conference Call Participants Mickey Schleien - Ladenburg Kevin Yonon - Managing Director of Portfolio Manager https://seekingalpha.com/article/4258025-oxford-square-capital-corp-oxsq-ceo-jonathan-cohen-on-q1-2019-results-earnings-call 1/8 12/4/21, 7:03 PM Oxford Square Capital Corp. (OXSQ) CEO Jonathan Cohen on Q1 2019 Results - Earnings Call Transcrip…	0
265	24.pdf	BP p.l.c. (NYSE:BP) Q1 2019 Earnings Conference Call April 30, 2019 4:00 AM ET	Oz Clint - Bernstein Biraj Borkhataria - RBC Christian Malek - JPMorgan Lydia Rainforth - Barclays Alastair Syme - Citi https://seekingalpha.com/article/4258020-bp-p-l-c-bp-on-q1-2019-results-earnings-call-transcript 1/35 12/4/21, 7:03 PM BP p.l.c. (BP) on Q1 2019 Results - Earnings Call Transcript _ Seeking Alpha Jason Gammel - Jefferies Thomas Adolff - Credit Suisse Irene Himona - Soc Gen Miche…	0
266	25.pdf	Equity Commonwealth (NYSE:EQC) Q1 2019 Results Earnings Conference Call April 30, 2019 9:00 AM ET	David Helfand - President and CEO David Weinberg - COO Adam Markman - CFO Conference Call Participants Manny Korchman - Citigroup https://seekingalpha.com/article/4258011-equity-commonwealth-eqc-ceo-david-helfand-on-q1-2019-results-earnings-call-transcript 1/13 12/4/21, 7:03 PM Equity Commonwealth (EQC) CEO David Helfand on Q1 2019 Results - Earnings Call Transcript _ Seeking Alpha Jamie Feldman …	0
267	26.pdf	Airbus SE (OTCPK:EADSY) Q1 2019 Earnings Conference Call April 30, 2019 2:00 AM ET	Conference Call Participants Douglas Harned - Sanford C. Bernstein & Co. Robert Stallard - Vertical Research Partners Celine Fornaro - UBS Investment Bank Benjamin Heelan - Bank of America Merrill Lynch https://seekingalpha.com/article/4257977-airbus-se-eadsy-ceo-guillaume-faury-on-q1-2019-results-earnings-call-transcript 1/24 12/4/21, 7:04 PM Airbus SE (EADSY) CEO Guillaume Faury on Q1 2019 Resu…	0
268	27.pdf	WellCare Health Plans, Inc. (NYSE:WCG) Q1 2019 Earnings Conference Call April 30, 2019 8:00 AM ET	Operator event is being recorded. ahead. Good morning, and welcome to WellCare's First Quarter 2019 Earnings Conference Call. All participants will be in listen-only mode. [Operator Instructions]. Please note this I would now like to turn the conference over to WellCare's management team. Please go https://seekingalpha.com/article/4257961-wellcare-health-plans-wcg-ceo-ken-burdick-on-q1-2019-resul…	0
269	28.pdf	Samsung Electronics Co., Ltd. (OTC:SSNLF) Q1 2019 Earnings Conference Call April 29, 2019 9:00 PM ET	KwonYoung Choi - VP, Samsung Display JongMin Lee - VP, Mobile Communications Business Seog-gi Kim - VP, Visual Display Business Conference Call Participants JongWoo Yoo - Korea Investment and Securities https://seekingalpha.com/article/4257949-samsung-electronics-co-ltd-ssnlf-q1-2019-results-earnings-call-transcript 1/28 12/4/21, 7:04 PM Samsung Electronics Co., Ltd. (SSNLF) Q1 2019 Results - Ear…	0
270	29.pdf	EVRAZ plc (OTCPK:EVRZF) Q1 2019 Earnings Conference Call April 29, 2019 9:00 AM ET	Conference Call Participants Nina Dergunova - Goldman Sachs Nikanor Khalin - VTB Capital Barry Ehrlich - Citigrop https://seekingalpha.com/article/4257904-evraz-plc-evrzf-ceo-alexander-frolov-on-q1-2019-results-earnings-call-transcript 1/17 12/4/21, 7:05 PM EVRAZ plc (EVRZF) CEO Alexander Frolov on Q1 2019 Results - Earnings Call Transcript _ Seeking Alpha Kabelo Moshesha - Renaissance Capital An…	0
271	3.pdf	Kuehne & Nagel International AG (OTCPK:KHNGF) Q4 2018 Earnings Conference Call February 27, 2019 8:00 AM ET	Mark McVicar – Barclays Aymeric Poulain – Kepler Cheuvreux Neil Glynn – Crédit Suisse David Kerstens – Jefferies Bruce Chan – Stifel https://seekingalpha.com/article/4245216-kuehne-and-nagels-khngf-ceo-detlef-trefzger-on-q4-2018-results-earnings-call-transcript 1/39 12/4/21, 6:54 PM Kuehne & Nagel's (KHNGF) CEO Detlef Trefzger on Q4 2018 Results - Earnings Call Transcript _ Seeking Alpha Damian B…	0
272	30.pdf	Yum China Holdings, Inc. (NYSE:YUMC) Q1 2019 Earnings Conference Call April 29, 2019 8:00 PM ET	Joey Wat - CEO Jacky Lo - CFO, VP and Treasurer Conference Call Participants Sara Senatore - Bernstein Michelle Cheng - Goldman Sachs Mike Tamas - Oppenhiemer C f https://seekingalpha.com/article/4257897-yum-china-yumc-ceo-joey-wat-on-q1-2019-results-earnings-call-transcript 1/28 12/4/21, 7:05 PM Yum China (YUMC) CEO Joey Wat on Q1 2019 Results - Earnings Call Transcript _ Seeking Alpha Chen Luo …	0
273	31.pdf	Texas Roadhouse, Inc. (NASDAQ:TXRH) Q1 2019 Earnings Conference Call April 29, 2019 5:00 PM ET	Tonya Robinson - CFO Conference Call Participants David Tarantino - Robert W. Baird Jeffrey Bernstein - Barclays Peter Saleh - BTIG Stephen Anderson - Maxim Group https://seekingalpha.com/article/4257896-texas-roadhouse-inc-txrh-on-q1-2019-results-earnings-call-transcript G S 1/26 12/4/21, 7:05 PM Texas Roadhouse, Inc. (TXRH) on Q1 2019 Results - Earnings Call Transcript _ Seeking Alpha John Glas…	0
274	32.pdf	Brooks Automation, Inc. (BRKS) Q2 2019 Results Earnings Conference Call April 29, 2019 4:30 PM ET	Mark Namaroff - Director, Investor Relations Stephen Schwartz - CEO Lindon Robertson - EVP and CFO Conference Call Participants Craig Ellis - B.Riley, FBR Patrick Ho - Stifel https://seekingalpha.com/article/4257890-brooks-automation-inc-brks-ceo-stephen-schwartz-on-q2-2019-results-earnings-call-transcript 1/23 12/4/21, 7:05 PM Brooks Automation, Inc. (BRKS) CEO Stephen Schwartz on Q2 2019 Result…	0
275	33.pdf	Western Digital Corporation (NASDAQ:WDC) Q3 2019 Earnings Conference Call April 29, 2019 5:00 PM ET	Stephen Milligan - CEO Robert Eulau - EVP & CFO Michael Cordano - President & COO Mark Long - CFO Conference Call Participants https://seekingalpha.com/article/4257888-western-digital-corporation-wdc-ceo-stephen-milligan-on-q3-2019-results-earnings-call 1/24 12/4/21, 7:06 PM Western Digital Corporation (WDC) CEO Stephen Milligan on Q3 2019 Results - Earnings Call Transcript _ Seeking Alpha Wamsi …	0
276	34.pdf	Ethan Allen Interiors Inc. (ETH) Q3 2019 Earnings Conference Call April 29, 2019 5:00 PM ET	Farooq Kathwari - Chairman and CEO Conference Call Participants Bobby Griffin - Raymond James Brad Thomas - KeyBanc Capital Markets Jeremy Hamblin - Dougherty & Company https://seekingalpha.com/article/4257887-ethan-allen-interiors-inc-eth-ceo-farooq-kathwari-on-q3-2019-results-earnings-call-transcript 1/15 Operator Corey Whitely on this call. this call. 12/4/21, 7:06 PM Ethan Allen Interiors Inc…	0
277	35.pdf	OceanaGold Corporation (OTCPK:OGDCF) Q1 2019 Earnings Conference Call April 29, 2019 5:30 PM ET	Reg Spencer – Canaccord Chris Thompson – PI Financial Matthew Friedman – Goldman Sachs Wayne Lam – RBC https://seekingalpha.com/article/4257886-oceanagolds-ogdcf-ceo-mick-wilkes-on-q1-2019-results-earnings-call-transcript 1/23 12/4/21, 7:12 PM OceanaGold's (OGDCF) CEO Mick Wilkes on Q1 2019 Results - Earnings Call Transcript _ Seeking Alpha John Tumazos – John Tumazos Very Independent Operator 5:…	0
278	36.pdf	Alphabet Inc. (NASDAQ:GOOG) Q1 2019 Results Earnings Conference Call April 29, 2019 4:30 PM ET	Sundar Pichai - Chief Executive Officer Conference Call Participants Eric Sheridan - UBS Doug Anmuth - JPMorgan https://seekingalpha.com/article/4257884-alphabet-inc-s-goog-ceo-sundar-pichai-on-q1-2019-results-earnings-call-transcript 1/27 12/4/21, 7:12 PM Alphabet Inc.'s (GOOG) CEO Sundar Pichai on Q1 2019 Results - Earnings Call Transcript _ Seeking Alpha Heather Bellini - Goldman Sachs Anthony…	0
279	37.pdf	Credit Acceptance Corporation (NASDAQ:CACC) Q1 2019 Earnings Conference Call April 29, 2019 5:00 PM ET	Brett Roberts - Chief Executive Officer Conference Call Participants Hugh Miller - The Buckingham Research Group John Rowan - Janney Montgomery Scott LLC Vincent Caintic - Stephens Inc. https://seekingalpha.com/article/4257882-credit-acceptance-corporation-cacc-ceo-brett-roberts-on-q1-2019-results-earnings-call 1/16 12/4/21, 7:12 PM Credit Acceptance Corporation (CACC) CEO Brett Roberts on Q1 201…	0
280	38.pdf	Neurocrine Biosciences, Inc. (NASDAQ:NBIX) Q1 2019 Earnings Conference Call April 29, 2019 4:30 PM ET	Kevin Gorman - Chief Executive Officer Jane Sorensen - Head, Investor Relations Matt Abernethy - Chief Financial Officer Eiry Roberts - Chief Medical Officer Eric Benevich - Chief Commercial Officer Kyle Gano - Chief Business Development Officer https://seekingalpha.com/article/4257881-neurocrine-biosciences-inc-nbix-ceo-kevin-gorman-on-q1-2019-results-earnings-call-transcript 1/33 12/4/21, 7:12 …	0
281	39.pdf	Southern Copper Corporation (NYSE:SCCO) Q1 2019 Earnings Conference Call April 29, 2019 10:00 AM ET	Conference Call Participants Arthur Suelotto – Bradesco BBI Andreas Bokkenheuser – UBS Petr Grishchenko – Barclays Carlos De Lava – Morgan Stanley Jon Brandt – HSBC O https://seekingalpha.com/article/4257879-southern-copper-scco-on-q1-2019-results-earnings-call-transcript 1/18 12/4/21, 7:13 PM Operator Southern Copper (SCCO) on Q1 2019 Results - Earnings Call Transcript _ Seeking Alpha Good morni…	0
282	4.pdf	Third Point Reinsurance Ltd (TPRE) Q4 2018 Earnings Conference Call February 28, 2019 8:30 AM ET	Christopher Coleman - CFO James Bredahl - President, CEO & Director Daniel Loeb - CEO & Portfolio Manager Conference Call Participants Michael Phillips - Morgan Stanley Meyer Shields - KBW https://seekingalpha.com/article/4245200-third-point-reinsurance-ltd-tpre-ceo-daniel-loeb-on-q4-2018-results-earnings-call-transcript 1/13 12/4/21, 6:55 PM Third Point Reinsurance Ltd (TPRE) CEO Daniel Loeb on …	0
283	40.pdf	TrueBlue, Inc. (NYSE:TBI) Q1 2019 Results Earnings Conference Call April 29, 2019 5:00 PM ET	Patrick Beharelle - CEO Conference Call Participants Henry Chien - BMO Mark Marcon - R.W. Baird Operator https://seekingalpha.com/article/4257878-trueblue-inc-tbi-ceo-patrick-beharelle-on-q1-2019-results-earnings-call-transcript 1/16 12/4/21, 7:13 PM TrueBlue, Inc. (TBI) CEO Patrick Beharelle on Q1 2019 Results - Earnings Call Transcript _ Seeking Alpha Good afternoon, my name is David, and I wil…	0
284	41.pdf	Constellation Brands, Inc. (NYSE:STZ) Q1 2020 Earnings Conference Call June 28, 2019 10:30 AM ET	William Newlands - President and Chief Executive Officer David Klein - Executive Vice President and Chief Financial Officer Conference Call Participants Judy Hong - Goldman Sachs Bonnie Herzog - Wells Fargo Securities, LLC https://seekingalpha.com/article/4272719-constellation-brands-inc-stz-ceo-william-newlands-on-q1-2020-results-earnings-call-transcript 1/32 12/4/21, 7:14 PM Constellation Brand…	0
285	42.pdf	JinkoSolar Holding Co., Ltd. (NYSE:JKS) Q1 2019 Earnings Conference Call June 28, 2019 8:00 AM ET	Conference Call Participants Philip Shen - ROTH Capital Partners Maheep Mandloi - Credit Suisse Brian Lee - Goldman Sachs Operator https://seekingalpha.com/article/4272691-jinkosolar-holding-co-ltd-jks-ceo-chen-kangping-on-q1-2019-results-earnings-call-transcript 1/18 12/4/21, 7:14 PM JinkoSolar Holding Co., Ltd. (JKS) CEO Chen Kangping on Q1 2019 Results - Earnings Call Transcript _ Seeking Alph…	0
286	43.pdf	Motorcar Parts of America, Inc. (NASDAQ:MPAA) Q4 2019 Earnings Conference Call June 28, 2019 9:30 AM ET	Company Participants Gary Maier - Investor Relations David Lee - Chief Financial Officer Conference Call Participants Steve Dyer - Craig-Hallum Chris Van Horn - B. Riley FBR https://seekingalpha.com/article/4272681-motorcar-parts-of-america-inc-mpaa-ceo-selwyn-joffe-on-q4-2019-earnings-conference-call 1/20 12/4/21, 7:15 PM Motorcar Parts of America, Inc. (MPAA) CEO Selwyn Joffe on Q4 2019 Earning…	1
287	44.pdf	Franklin Covey Co. (NYSE:FC) Q3 2019 Results Earnings Conference Call June 27, 2019 5:00 PM ET	Derek Hatch - Corporate Controller, Central Services, Finance Bob Whitman - Chairman and CEO Steve Young - Chief Financial Officer Paul Walker - President, Enterprise Division Todd Davis - Executive Vice President, Chief People Officer Sean Covey - President, FranklinCovey Education https://seekingalpha.com/article/4272589-franklin-covey-co-s-fc-ceo-bob-whitman-on-q3-2019-results-earnings-call-tr…	0
288	45.pdf	CalAmp Corp. (NASDAQ:CAMP) Q1 2020 Results Earnings Conference Call June 27, 2019 4:30 PM ET	Michael Burdiek - President and Chief Executive Officer Kurt Binder - Executive Vice President and Chief Financial Officer Conference Call Participants Michael Walkley - Canaccord Genuity Jonathan Ho - William Blair & Co. https://seekingalpha.com/article/4272586-calamp-corp-camp-ceo-michael-burdiek-on-fiscal-q1-2020-results-earnings-call-transcript 1/25 12/4/21, 7:15 PM CalAmp Corp. (CAMP) CEO Mi…	0
289	46.pdf	Progress Software Corporation (NASDAQ:PRGS) Q2 2019 Earnings Conference Call June 27, 2019 5:00 PM ET	Yogesh Gupta - Chief Executive Officer Paul Jalbert - Chief Financial Officer Conference Call Participants Matthew Galinko - National Securities Mark Schappel - Benchmark https://seekingalpha.com/article/4272585-progress-software-corporation-prgs-ceo-yogesh-gupta-on-q2-2019-results-earnings-call 1/14 12/4/21, 7:15 PM Progress Software Corporation (PRGS) CEO Yogesh Gupta on Q2 2019 Results - Earni…	0
290	47.pdf	SMART Global Holdings, Inc. (NASDAQ:SGH) Q3 2019 Earnings Conference Call June 27, 2019 4:30 PM ET	Ajay Shah - Chairman and Chief Executive Officer Jack Pacheco - Chief Operating and Chief Financial Officer Conference Call Participants Kevin Cassidy - Stifel Mark Lipacis - Jefferies https://seekingalpha.com/article/4272584-smart-global-holdings-inc-sgh-ceo-ajay-shah-on-q3-2019-results-earnings-call-transcript 1/24 12/4/21, 7:16 PM SMART Global Holdings, Inc. (SGH) CEO Ajay Shah on Q3 2019 Resu…	0
291	48.pdf	Empire Company Limited (OTCPK:EMLAF) Q4 2019 Earnings Conference Call June 27, 2019 ET	Pierre St-Laurent - EVP, Merchandising and Quebec Conference Call Participants James Durran - Barclays Bank PLC Michael Van Aelst - TD Securities Irene Nattel - RBC Capital Markets, LLC https://seekingalpha.com/article/4272581-empire-company-limited-emlaf-ceo-michael-medline-on-q4-2019-results-earnings-call-transcript 1/33 12/4/21, 7:16 PM Empire Company Limited (EMLAF) CEO Michael Medline on Q4 …	0
292	49.pdf	NIKE, Inc. (NYSE:NKE) Q4 2019 Earnings Conference Call June 27, 2019 5:00 PM ET	Andy Campion - EVP and CFO Conference Call Participants Bob Drbul - Guggenheim Securities Lauren Cassel - Morgan Stanley Brian Nagel - Oppenheimer Omar Saad - Evercore ISI https://seekingalpha.com/article/4272580-nike-inc-nke-ceo-mark-parker-on-q4-2019-results-earnings-call-transcript 1/30 12/4/21, 7:16 PM NIKE, Inc. (NKE) CEO Mark Parker on Q4 2019 Results - Earnings Call Transcript _ Seeking Al…	0
293	5.pdf	Endo International plc (NASDAQ:ENDP) Q4 2018 Earnings Conference Call February 28, 2019 7:30 AM ET	Laure Park - IR Paul Campanelli - President and CEO Blaise Coleman - EVP and CFO Pat Barry - EVP and CCO, Branded Business Conference Call Participants Chris Schott - JP Morgan https://seekingalpha.com/article/4245177-endo-international-plc-endp-ceo-paul-campanelli-on-q4-2018-results-earnings-call-transcript 1/30 12/4/21, 6:55 PM Endo International plc (ENDP) CEO Paul Campanelli on Q4 2018 Result…	0
294	50.pdf	Avid Bioservices, Inc. (NASDAQ:CDMO) Q4 2019 Results Conference Call June 27, 2019 4:30 PM ET	Rick Hancock - Interim President and CEO Dan Hart - Chief Financial Officer Tracy Kinjerski - Vice President of Business Operations Conference Call Participants Joe Pantginis - H.C. Wainwright https://seekingalpha.com/article/4272571-avid-bioservices-inc-cdmo-ceo-rick-hancock-on-q4-2019-results-earnings-call-transcript 1/18 12/4/21, 7:16 PM Avid Bioservices, Inc. (CDMO) CEO Rick Hancock on Q4 201…	0
295	6.pdf	SharpSpring, Inc. (NASDAQ:SHSP) Q4 2018 Earnings Conference Call February 27, 2019 4:30 PM ET	Mike Malouf - Craig-Hallum Capital Operator Good afternoon. Welcome to SharpSpring’s Fourth Quarter and Full Year 2018 Earnings Conference Call. Joining us today are SharpSpring’s CEO, Rick Carlson and CFO, Brad Stanczak. Following their remarks, we will open up the call for your questions. Then before we conclude, I will provide the necessary cautions regarding the forward-looking statements mad…	0
296	7.pdf	Adaptimmune Therapeutics plc (NASDAQ:ADAP) Q4 2018 Results Earnings Conference Call February 27, 2019 8:00 PM ET	James Noble - CEO Helen Tayton-Martin - Chief Business Officer Adrian Rawcliffe - CFO Rafael Amado - President, Research and Development Conference Call Participants https://seekingalpha.com/article/4245090-adaptimmune-therapeutics-adap-ceo-james-noble-on-q4-2018-results-earnings-call-transcript 1/29 12/4/21, 6:55 PM Adaptimmune Therapeutics (ADAP) CEO James Noble on Q4 2018 Results - Earnings Ca…	1
297	8.pdf	Koninklijke Ahold Delhaize N.V. ADR (OTCQX:ADRNY) Q4 2018 Earnings Conference Call February 27, 2019 3:00 AM ET	Fernand de Boer - Banque Degroof Petercam S.A. Robert Jan Vos - ABN AMRO Bank N.V. Bruno Monteyne - Sanford C. Bernstein & Co., LLC Nick Coulter - Citigroup Inc. Xavier Le Mené - Bank of America Merrill Lynch https://seekingalpha.com/article/4245089-koninklijke-ahold-delhaize-n-v-adr-adrny-ceo-frans-muller-on-q4-2018-results-earnings-call 1/35 12/4/21, 6:56 PM Koninklijke Ahold Delhaize N.V. ADR …	0
298	9.pdf	BeiGene (NASDAQ:BGNE) Q4 2018 Earnings Conference Call February 27, 2019 6:00 PM ET	Howard Liang - Chief Financial Officer and Chief Strategy Officer John Oyler - Chairman, Co-Founder and Chief Executive Officer Xiaobin Wu - General Manager of China and President of BeiGene, Ltd. Eric Hedrick - Interim Chief Medical Officer, Immuno-Oncology Conference Call Participants Vikram Purohit - Morgan Stanley & Co. LLC Yaron Werber - Cowen and Company, LLC & C https://seekingalpha.com/ar…	1
299	1.pdf	NRG Energy, Inc. (NYSE:NRG) Q4 2016 Earnings Call February 28, 2017 8:00 AM ET	Kirkland B. Andrews - NRG Energy, Inc. Chris Moser - NRG Energy, Inc. Analysts Stephen Calder Byrd - Morgan Stanley & Co. LLC Antoine Aurimond - UBS Securities LLC https://seekingalpha.com/article/4050498-nrg-energy-nrg-q4-2016-results-earnings-call-transcript 1/26 12/3/21, 11:31 PM NRG Energy (NRG) Q4 2016 Results - Earnings Call Transcript _ Seeking Alpha Greg Gordon - Evercore ISI Steve Fleish…	1
300	10.pdf	Jupai Holdings (NYSE:JP) Q4 2016 Earnings Conference Call February 28, 2017 7:00 AM ET	Steven Ju - Credit Suisse Operator Thank you for standing by for Jupai's Fourth Quarter and Full-Year 2016 Earnings Conference Call. At this time, all participants are in a listen-only mode. After management's prepared remarks, there will be a question-and-answer session. Please note today’s conference call is being recorded. If you have any objections you may disconnect at this time. https://see…	0
301	100.pdf	ReNeuron Group Plc (OTCPK:RNUGF) Q4 2017 Earnings Conference Call June 29, 2017 4:00 AM ET	Jens Lindqvist - N+1 Singer Equity Research Olivia Manser - Stifel Olav Hellebø Good morning everyone. Welcome to our Preliminary Results Presentation for the Year Ended 31st of March, 2017. I am Olav Hellebø, CEO. With me today is Michael Hunt, our Chief Financial Officer; and Julian Howell, the brains of the corporation, our CMO. And we will be delighted to take you through the presentation tod…	0
302	101.pdf	IHS Markit Ltd. (NYSE:INFO) Q2 2017 Earnings Conference Call June 27, 2017 8:00 AM ET	Jerre Stead - Chairman and CEO Lance Uggla - President Todd Hyatt - EVP and CFO Analysts Peter Appert - Piper Jaffray https://seekingalpha.com/article/4084345-ihs-markits-info-ceo-jerre-stead-on-q2-2017-results-earnings-call-transcript 1/31 12/4/21, 6:09 PM IHS Markit's (INFO) CEO Jerre Stead on Q2 2017 Results - Earnings Call Transcript _ Seeking Alpha Bill Warmington - Wells Fargo Securities Ga…	0
303	11.pdf	Theravance Biopharma, Inc. (NASDAQ:TBPH) Q4 2016 Results Earnings Conference Call February 27, 2017 5:00 PM ET	Brett Haumann - SVP, Clinical Development & Chief Medical Officer Alexander Dobbin - Head of Investor Relations Analysts Geoffrey Porges - Leerink Partners https://seekingalpha.com/article/4050273-theravance-biopharmas-tbph-ceo-rick-winningham-on-q4-2016-results-earnings-call-transcript 1/24 12/4/21, 10:06 AM Theravance Biopharma's (TBPH) CEO Rick Winningham on Q4 2016 Results - Earnings Call Tra…	0
304	12.pdf	Workday, Inc. (NASDAQ:WDAY) Q4 2017 Earnings Conference Call February 27, 2017 5:00 PM ET	Aneel Bhusri - Chief Executive Officer Robynne Sisco - Chief Financial Officer Philip Wilmington - Co-President Analysts Mark Murphy - J.P. Morgan https://seekingalpha.com/article/4050269-workdays-wday-ceo-aneel-bhusri-on-q4-2017-results-earnings-call-transcript 1/30 12/4/21, 10:07 AM Workday's (WDAY) CEO Aneel Bhusri on Q4 2017 Results - Earnings Call Transcript _ Seeking Alpha Karl Keirstead - …	0
305	13.pdf	Insulet Corporation (NASDAQ:PODD) Q4 2016 Results Earnings Conference Call February 27, 2017 4:30 PM ET	Michael Levitz - SVP and CFO Shacey Petrovic - President and COO Analysts David Lewis - Morgan Stanley & Co. LLC https://seekingalpha.com/article/4050268-insulets-podd-ceo-patrick-sullivan-on-q4-2016-results-earnings-call-transcript 1/36 12/4/21, 10:08 AM Insulet's (PODD) CEO Patrick Sullivan on Q4 2016 Results - Earnings Call Transcript _ Seeking Alpha Jeff Johnson - Robert W. Baird & Co., Inc. …	0
306	14.pdf	Orthofix International N.V. (NASDAQ:OFIX) Q4 2016 Earnings Conference Call February 27, 2017 4:30 PM ET	Doug Rice - Chief Financial Officer Brad Niemann - President of BioStim Mike Finegan - Chief Strategy Officer Analysts https://seekingalpha.com/article/4050266-orthofix-internationals-ofix-ceo-bradley-mason-on-q4-2016-results-earnings-call-transcript 1/23 12/4/21, 10:08 AM Orthofix International's (OFIX) CEO Bradley Mason on Q4 2016 Results - Earnings Call Transcript _ Seeking Alpha Anthony Petro…	0
307	15.pdf	Perrigo Co. Plc (NYSE:PRGO) Q4 2016 Earnings Conference Call February 27, 2017 4:30 PM ET	David Risinger - Morgan Stanley Gregg Gilbert - Deutsche Bank Securities Randall Stanicky - RBC Capital Markets LLC Jami Rubin - Goldman Sachs Louise Chen - Guggenheim David Maris Wells Fargo Securities https://seekingalpha.com/article/4050265-perrigos-prgo-ceo-john-hendrickson-on-q4-2016-results-earnings-call-transcript 1/31 12/4/21, 10:09 AM Perrigo's (PRGO) CEO John Hendrickson on Q4 2016 Resu…	0
308	16.pdf	DigitalGlobe, Inc. (DGI) Q4 2016 Earnings Conference Call February 27, 2017 5:00 PM ET	Howard Lance - President & CEO, MDA Anil Wirasekara - EVP & CFO, MDA Gary Ferrera - CFO, DigitalGlobe, Inc. Analysts Steve Arthur - RBC Capital Markets Ash Birla - Dougherty & Company S https://seekingalpha.com/article/4050264-digitalglobes-dgi-ceo-jeff-tarr-on-q4-2016-results-earnings-call-transcript 1/29 12/4/21, 10:09 AM DigitalGlobe's (DGI) CEO Jeff Tarr on Q4 2016 Results - Earnings Call Tra…	0
309	17.pdf	Nutrisystem Inc (NASDAQ:NTRI) Q4 2016 Earnings Conference Call February 27, 2017 5:00 PM ET	Frank Camma - Sidoti & Company Mitch Pinheiro - Wunderlich Securities Linda Bolton-Weiser - B. Riley Alex Fuhrman - Craig-Hallum Capital Group Matthew Gall - Barrington Chris Krueger Lake Street Capital Markets https://seekingalpha.com/article/4050260-nutrisystems-ntri-ceo-dawn-zier-on-q4-2016-results-earnings-call-transcript 1/26 12/4/21, 10:10 AM Nutrisystem's (NTRI) CEO Dawn Zier on Q4 2016 Re…	1
310	18.pdf	Kona Grill, Inc. (OTC:KONA) Q4 2016 Results Earnings Conference Call February 27, 2017 4:30 PM ET	Robert Derrington - Telsey Advisory Group Alex Silverman - Special Situations Fund Chris Krueger - Lake Street Capital Markets Mike Tamis - Oppenheimer & Company Alex Marty - Raymond James Chris O'Cull KeyBanc Capital Markets https://seekingalpha.com/article/4050259-kona-grills-kona-ceo-berke-bakay-on-q4-2016-results-earnings-call-transcript 1/26 12/4/21, 10:11 AM Kona Grill's (KONA) CEO Berke Ba…	1
311	19.pdf	Ideal Power Inc. (NASDAQ:IPWR) Q4 2016 Earnings Conference Call February 27, 2017 4:30 PM ET	Tim Burns - Chief Financial Officer Analysts Eric Stine - Craig-Hallum Colin Rusch - Oppenheimer https://seekingalpha.com/article/4050258-ideal-powers-ipwr-ceo-dan-brdar-on-q4-2016-results-earnings-call-transcript 1/30 12/4/21, 10:12 AM Ideal Power's (IPWR) CEO Dan Brdar on Q4 2016 Results - Earnings Call Transcript _ Seeking Alpha Jeff Grampp - Northland Capital Markets Carter Driscoll - FBR Ope…	0
312	2.pdf	Meggitt Plc (OTCPK:MEGGF) Q4 2016 Results Earnings Conference Call February 28, 2017 5:30 AM ET	David Perry - JPMorgan Christian Laughlin - Sanford C. Bernstein Andrew Gollan - Berenberg Rami Myerson - Investec Harry Breach - Raymond James https://seekingalpha.com/article/4050496-meggitts-meggf-ceo-stephen-young-on-q4-2016-results-earnings-call-transcript 1/36 12/3/21, 11:36 PM Meggitt's (MEGGF) CEO Stephen Young on Q4 2016 Results - Earnings Call Transcript _ Seeking Alpha Operator Stephen…	0
313	20.pdf	Kratos Defense & Security Solutions, Inc. (NASDAQ:KTOS) Q4 2016 Earnings Conference Call February 28, 2017 5:30 PM ET	Deanna Lund - Executive Vice President and Chief Financial Officer Analysts Mike Crawford - B. Riley & Company Ken Herbert - Canaccord https://seekingalpha.com/article/4050257-kratos-defense-and-security-solutions-ktos-eric-demarco-on-q4-2016-results-earnings-call 1/30 12/4/21, 10:12 AM Kratos Defense & Security Solutions' (KTOS) Eric DeMarco on Q4 2016 Results - Earnings Call Transcript _ Seekin…	0
314	21.pdf	Atlantica Yield plc (ABY) Q4 2016 Results Earnings Conference Call February 27, 2017 4:30 PM ET	Analysts Julien Dumoulin-Smith - UBS Sophie Karp - Guggenheim Securities Michael Morosi - Avondale Partners https://seekingalpha.com/article/4050253-atlantica-yields-aby-ceo-santiago-seage-on-q4-2016-results-earnings-call-transcript 1/20 12/4/21, 10:14 AM Atlantica Yield's (ABY) CEO Santiago Seage on Q4 2016 Results - Earnings Call Transcript _ Seeking Alpha Jeff Friedman - GMO Angie Storozynski …	0
315	22.pdf	RealPage (NASDAQ:RP) Q4 2016 Earnings Conference Call February 27, 2017 5:00 PM ET	Matt Hedberg - RBC Capital Markets Brandon Dobell - William Blair Operator Good day everyone and welcome to the RealPage Fourth Quarter and Year End 2016 Financial Results Conference Call. All participants will be in a listen-only mode. [Operator Instructions]. After today's presentation, there will be an opportunity to ask questions. [Operator Instructions]. Please note that the event is being r…	1
316	23.pdf	Fiesta Restaurant Group, Inc. (NASDAQ:FRGI) Q4 2016 Earnings Conference Call February 27, 2017 5:00 PM ET	Will Slabaugh - Stephens, Inc. Jeff Farmer - Wells Fargo Securities, LLC Joshua Long - Piper Jaffray & Co. Nick Setyan - Wedbush Securities, Inc. Operator Good afternoon and welcome to the Fiesta Restaurant Group Fourth Quarter and Full https://seekingalpha.com/article/4050250-fiesta-restaurant-group-frgi-richard-stockinger-on-q4-2016-results-earnings-call-transcript 1/16 12/4/21, 10:16 AM Fiesta…	0
317	24.pdf	Gaia Inc. (NASDAQ:GAIA) Q4 2016 Earnings Conference Call February 27, 2017 4:30 PM ET	Analysts Mark Argento - Lake Street Capital Markets Jamie DeYoung - Goudy Park Zacary Sherman - Foxhill Capital Partners Douglas Coburn - Venture Capital https://seekingalpha.com/article/4050249-gaias-gaia-ceo-jirka-rysavy-on-q4-2016-results-earnings-call-transcript 1/21 S C 12/4/21, 10:16 AM Gaia's (GAIA) CEO Jirka Rysavy on Q4 2016 Results - Earnings Call Transcript _ Seeking Alpha Matt Sweeney…	1
318	25.pdf	SBA Communications Corporation (NASDAQ:SBAC) Q4 2016 Earnings Conference Call February 27, 2017 5:00 PM ET	Brendan Cavanagh – Chief Financial Officer Jeff Stoops – President and Chief Executive Officer Analysts Rick Prentiss – Raymond James Jonathan Schildkraut – Guggenheim https://seekingalpha.com/article/4050248-sba-communications-sbac-ceo-jeff-stoops-on-q4-2016-results-earnings-call-transcript 1/29 12/4/21, 10:19 AM SBA Communications' (SBAC) CEO Jeff Stoops on Q4 2016 Results - Earnings Call Trans…	0
319	26.pdf	The Priceline Group, Inc. (PCLN) Q4 2016 Earnings Conference Call February 27, 2017 4:30 PM ET	Daniel Finnegan – Chief Financial Officer and Chief Accounting Officer Analysts Mark Mahaney – RBC Capital Markets Justin Post – Bank of America https://seekingalpha.com/article/4050246-priceline-groups-pcln-ceo-glenn-fogel-on-q4-2016-results-earnings-call-transcript 1/33 12/4/21, 10:19 AM The Priceline Group's (PCLN) CEO Glenn Fogel on Q4 2016 Results - Earnings Call Transcript _ Seeking Alpha D…	0
320	27.pdf	Globus Medical, Inc. (NYSE:GMED) Q4 2016 Earnings Conference Call February 27, 2017 5:30 PM ET	Anthony Williams - President Dave Demski - Group President of Emerging Technologies Brian Kearns - VP Business Development Analysts https://seekingalpha.com/article/4050245-globus-medicals-gmed-ceo-david-paul-on-q4-2016-results-earnings-call-transcript 1/30 12/4/21, 10:20 AM Globus Medical's (GMED) CEO David Paul on Q4 2016 Results - Earnings Call Transcript _ Seeking Alpha Matt Miksic - UBS Jona…	0
321	28.pdf	Crawford & Company (NYSE:CRD.B) Q4 2016 Results Earnings Conference Call February 27, 2017 4:30 PM ET	Bruce Swain - CFO Analysts Greg Peters - Raymond James Mark Hughes - SunTrust Robinson Humphrey https://seekingalpha.com/article/4050244-crawford-and-companys-crd-b-ceo-harsha-agadi-on-q4-2016-results-earnings-call-transcript 1/20 12/4/21, 10:21 AM Crawford & Company's (CRD.B) CEO Harsha Agadi on Q4 2016 Results - Earnings Call Transcript _ Seeking Alpha Operator Good afternoon. My name is Victor…	0
322	29.pdf	Emerge Energy Services LP. (NYSE:EMES) Q4 2016 Earnings Conference Call February 27, 2017 3:00 PM ET	Arieh Coll - Coll Capital Mark Brown - Seaport Global Securities Operator Good day, ladies and gentlemen, and welcome to the Emerge Energy Services Fourth Quarter 2016 Earnings Conference Call. At this time, all participants are in a listen-only mode. Later, we will conduct a question-and-answer session and instructions will follow at that time [Operator Instructions] As a reminder this call is b…	1
323	3.pdf	Golden Ocean Group Limited (NASDAQ:GOGL) Q4 2016 Earnings Conference Call February 28, 2017 8:00 AM ET	ahead. Birgitte Vartdal Thank you. Good day and welcome to the Q4 2016 Golden Ocean Group Limited Earnings Conference Call. Today's conference is being recorded. At this time, I would like to turn the conference over to Birgitte Vartdal, CEO. Please go https://seekingalpha.com/article/4050491-golden-ocean-groups-gogl-birgitte-vartdal-on-q4-2016-results-earnings-call-transcript 1/14 12/4/21, 12:04…	1
324	30.pdf	Accelerate Diagnostics, Inc. (NASDAQ:AXDX) Q4 2016 Results Earnings Conference Call February 27, 2017 4:15 PM ET	Karen Koski - BTIG Bill Quirk - Piper Jaffray Operator Good day and welcome to the Accelerate Diagnostics, Incorporated 2016 Q4 Results Conference Call. All participants will be in listen-only mode. After today's presentation there will be a question and answer session. Please note this event is being recorded. https://seekingalpha.com/article/4050241-accelerate-diagnostics-axdx-ceo-lawrence-mehr…	0
325	31.pdf	Boart Longyear Limited (OTCPK:BOARF) Q4 2016 Results Earnings Conference Call February 26, 2017 6:30 PM ET	would like to welcome everyone to today’s web conference. All lines have been placed on mute to prevent any background noise. Please note that today’s web conference is being recorded. We will be taking questions over the phone during today’s presentation and you will receive instructions on how to ask a question over the phone at that time. At this time, I would like turn today’s program over to…	1
326	32.pdf	ICF International, Inc. (NASDAQ:ICFI) Q4 2016 Results Conference Call February 27, 2017 5:00 PM ET	Kwan Kim - SunTrust Tim McHugh - William Blair Joseph Vafi - Loop Capital Edward Caso - Wells fargo Ben Klieve - Noble Capital Market Operator https://seekingalpha.com/article/4050232-icf-internationals-icfi-ceo-sudhakar-kesavan-on-q4-2016-results-earnings-call-transcript 1/20 12/4/21, 10:23 AM Operator ICF International's (ICFI) CEO Sudhakar Kesavan on Q4 2016 Results - Earnings Call Transcript …	1
327	33.pdf	Frontier Communications Corp (FTR) Q4 2016 Earnings Conference Call February 27, 2017 4:30 PM ET	Phil Cusick - JPMorgan Greg Williams - Cowen and Company Josh Frantz – Bank of America Merrill Lynch Scott Goldman - Jefferies Frank Louthan - Raymond James & Associates Matthew Niknam Deutsche Bank https://seekingalpha.com/article/4050229-frontier-communications-ftr-ceo-dan-mccarthy-on-q4-2016-results-earnings-call-transcript 1/27 12/4/21, 10:23 AM Frontier Communications' (FTR) CEO Dan McCarthy…	1
328	34.pdf	Heidrick & Struggles International, Inc. (NASDAQ:HSII) Q4 2016 Earnings Conference Call February 27, 2017 5:00 PM ET	Julie Creed - Vice President, Investor Relations and Real Estate Tracy Wolstencroft - Chief Executive Officer Richard Pehlke - Chief Financial Officer Analysts Stephen Sheldon - William Blair & Company Kevin McVeigh - Deutsche Bank Securities, Inc. https://seekingalpha.com/article/4050228-heidrick-and-struggles-internationals-hsii-ceo-tracy-wolstencroft-on-q4-2016-results-earnings 1/16 12/4/21, 1…	0
329	35.pdf	Revance Therapeutics Inc (NASDAQ:RVNC) Q4 2016 Earnings Conference Call February 27, 2017 4:30 PM ET	Lauren Silvernail - Chief Business Officer and CFO Analysts Ken Cacciatore - Cowen & Company Sameer Singh - Piper Jaffray https://seekingalpha.com/article/4050219-revance-therapeutics-rvnc-ceo-dan-browne-on-q4-2016-results-earnings-call-transcript 1/17 12/4/21, 10:24 AM Revance Therapeutics' (RVNC) CEO Dan Browne on Q4 2016 Results - Earnings Call Transcript _ Seeking Alpha Tim Lugo - William Bla…	0
330	36.pdf	Forest City Enterprises, Inc. (NYSE:FCE.A) Q4 2016 Earnings Conference Call February 27, 2017 1:00 PM ET	James Feldman - Bank of America Merrill Lynch Brad K. Burke - Goldman Sachs Paul E. Adornato - BMO Capital Markets Michael Bilerman - Citi Operator https://seekingalpha.com/article/4050216-forest-city-enterprises-fce-ceo-david-larue-on-q4-2016-results-earnings-call-transcript 1/25 12/4/21, 10:25 AM Forest City Enterprises' (FCE.A) CEO David LaRue on Q4 2016 Results - Earnings Call Transcript _ Se…	1
331	37.pdf	AppFolio, Inc. (NASDAQ:APPF) Q4 2016 Earnings Conference Call February 27, 2017 Erica Abrams – Investor Relations	Executives Analysts Operator Good day, ladies and gentlemen and welcome to the Fourth Quarter and Fiscal Year 2016 Financial Results Conference Call. At this time, all participants are in a listen-only https://seekingalpha.com/article/4050215-appfolios-appf-ceo-brian-donahoo-on-q4-2016-results-earnings-call-transcript 1/8 12/4/21, 10:25 AM AppFolio's (APPF) CEO Brian Donahoo on Q4 2016 Results - …	1
332	38.pdf	Kosmos Energy's (KOS) CEO Andy Inglis on Q4 2016 Results - Earnings Call Transcript	Tom Chambers - SVP and CFO Analysts Brendan Warn - BMO Capital Markets Ed Westlake - Credit Suisse Anish Kapadia - Tudor, Pickering, Holt & Co. https://seekingalpha.com/article/4050214-kosmos-energys-kos-ceo-andy-inglis-on-q4-2016-results-earnings-call-transcript 1/31 12/4/21, 10:26 AM Kosmos Energy's (KOS) CEO Andy Inglis on Q4 2016 Results - Earnings Call Transcript _ Seeking Alpha Richard Tull…	0
333	39.pdf	Novavax, Inc. (NASDAQ:NVAX) Q4 2016 Results Earnings Conference Call February Dr. Greg Glenn - President of Research and Development	Jessica Fye - J.P. Morgan Joel Beatty - Citi Edward Tenthoff - Piper Jaffray Kevin DeGeeter - Ladenburg Operator Good day, ladies and gentlemen and welcome to the Novavax Fourth Quarter and Full Year 2016 Financial Results Conference Call. At this time, all participants are in a listen- https://seekingalpha.com/article/4050213-novavaxs-nvax-ceo-stan-erck-on-q4-2016-results-earnings-call-transcrip…	1
334	4.pdf	PRGX Global Inc (NASDAQ:PRGX) Q4 2016 Results Earnings Conference Call February 28, 2017 8:30 AM ET	Operator Good day ladies and gentlemen and welcome to the PRGX Global, Inc. fourth quarter 2016 earnings conference call. At this time, all participants are in a listen-only mode. Later, we will conduct a question-and-answer session and instructions will be given to you at that time. [Operator Instructions]. As a reminder, this call is being recorded. Speaking on today' call is Ron Stewart, Chief…	1
335	40.pdf	Sasol Limited (NYSE:SSL) Q4 2016 Results Conference Call February 27, 2017 8:00 AM ET	Gerhard Engelbrecht - Macquarie Sean Ungerer - Arqaam Capital Chris Nicholson - Morgan Stanley Alex Comer - JPMorgan Adrian Hammond - Standard Bank Operator https://seekingalpha.com/article/4050201-sasols-ssl-ceo-stephen-cornell-on-sasol-interim-financial-results-earnings-call-transcript 1/26 12/4/21, 10:27 AM Operator Sasol's (SSL) CEO Stephen Cornell on Sasol Interim Financial Results - Earning…	0
336	41.pdf	Installed Building Products Inc (NYSE:IBP) Q4 2016 Earnings Conference Call February 27, 2017 10:00 AM ET	Michael Miller - CFO Analysts Bob Wetenhall - RBC Capital Markets Nishu Sood - Deutsche Bank https://seekingalpha.com/article/4050194-installed-building-products-ibp-ceo-jeff-edwards-on-q4-2016-results-earnings-call-transcript 1/28 12/4/21, 10:28 AM Installed Building Products' (IBP) CEO Jeff Edwards on Q4 2016 Results - Earnings Call Transcript _ Seeking Alpha Scott Rednor - Zelman & Associates …	0
337	42.pdf	BioCryst Pharmaceuticals, Inc. (NASDAQ:BCRX) Q4 2016 Earnings Conference Call February 27, 2017 9:00 AM ET	Jon Stonehouse - CEO Tom Staab - CFO Bill Sheridan - CMO Emel Aygören-Pürsün - Principal Investigator, APeX-1 Trial Bruce Zuraw - Division Chief and Professor of Medicine, University of California, San Diego School of Medicine & Director, United States Hereditary Angioedema Association https://seekingalpha.com/article/4050189-biocryst-pharmaceuticals-bcrx-ceo-jon-stonehouse-on-q4-2016-results-ear…	0
338	43.pdf	TEGNA Inc. (NYSE:TGNA) Q4 2016 Earnings Conference Call February 27, 2017 10:00 AM ET	David T. Lougee - President, TEGNA Media Alex Vetter - President and CEO, Cars.com LLC Matthew W. Ferguson - CEO, CareerBuilder LLC John A. Williams - President, Digital Ventures https://seekingalpha.com/article/4050188-tegnas-tgna-ceo-gracia-martore-on-q4-2016-results-earnings-call-transcript 1/30 12/4/21, 10:29 AM TEGNA's (TGNA) CEO Gracia Martore on Q4 2016 Results - Earnings Call Transcript _…	0
339	44.pdf	National General Holdings Corp. (NASDAQ:NGHC) Q4 2016 Earnings Conference Call February 27, 2017 11:00 PM ET	Matt Carletti – JMP Securities Randy Binner – FBR Capital Markets Meyer Shields – Keefe, Bruyette & Woods Good morning ladies and gentleman, and welcome to the National General Fourth Quarter 2016 Earnings Call. At this time, all participants will be placed in a listen-only mode and we will open up floor for your questions or comments after the presentation. https://seekingalpha.com/article/40501…	0
340	45.pdf	Deltic Timber Corporation (NYSE:DEL) Q4 2016 Results Earnings Conference Call February 27, 2017 12:30 PM ET	Operator Welcome to the Fourth Quarter 2016 Deltic Timber Corporation Conference Call. My name is Ellen and I’ll be your operator for today’s call. At this time, all participants are in a listen-only mode. Later, we will conduct a question-and-answer session. Please note that this conference is being recorded. I will now turn the call over to Interim President and CEO, Mark Leland. Mr. Leland, yo…	0
341	46.pdf	AmTrust Financial Services, Inc. (NASDAQ:AFSI) Q4 2016 Earnings Conference Call February 27, 2017 10:00 AM ET	Mark Hughes - SunTrust Randy Binner - FBR Capital Markets Adam Klauber - William Blair Meyer Shields - KBW Ken Billingsley - Compass Point Operator https://seekingalpha.com/article/4050175-amtrust-financial-services-afsi-ceo-barry-zyskind-on-q4-2016-results-earnings-call-transcript 1/34 12/4/21, 10:34 AM Operator AmTrust Financial Services' (AFSI) CEO Barry Zyskind on Q4 2016 Results - Earnings C…	1
342	47.pdf	AES Corporation (NYSE:AES) Q4 2016 Earnings Conference Call February 27, 2017 9:00 AM ET	Thomas O’Flynn - EVP and Chief Financial Officer Analysts Ali Agha - SunTrust Robinson Humphrey Julien Dumoulin-Smith - UBS Securities Stephen Byrd - Morgan Stanley https://seekingalpha.com/article/4050163-aes-aes-ceo-andres-gluski-on-q4-2016-results-earnings-call-transcript 1/33 S 12/4/21, 10:34 AM AES' (AES) CEO Andrés Gluski on Q4 2016 Results - Earnings Call Transcript _ Seeking Alpha Angie S…	0
343	48.pdf	JinkoSolar Holding Co., Ltd. (NYSE:JKS) Q42016 Results Earnings Conference Call February 27, 2017 8:00 AM ET	Cao Haiyun - CFO Gener Miao - VP Global Sales and Marketing Analysts Maheep Mandloi - Credit Suisse https://seekingalpha.com/article/4050160-jinkosolars-jks-ceo-chen-kangping-on-q4-2016-results-earnings-call-transcript 1/21 12/4/21, 10:35 AM JinkoSolar's (JKS) CEO Chen Kangping on Q4 2016 Results - Earnings Call Transcript _ Seeking Alpha Philip Shen - ROTH Capital Partners Brad Meikle - Craig-Ha…	1
344	49.pdf	Global Net Lease, Inc. (NYSE:GNL) Q4 2016 Earnings Conference Call February 27, 2017 11:00 AM ET	Operator Good morning and welcome to the Global Net Lease Fourth Quarter 2016 Earnings Call. All participants will be in listen-only mode. After today's presentation, there will an opportunity to ask questions. Please note that this call is being recorded. I would now like to turn the conference over to Mr. Matthew Furbish, GNL’s Vice President of Investor Relations. Please go ahead. Matthew Furb…	0
345	5.pdf	PrairieSky Royalty Ltd (OTCPK:PREKF) Q4 2016 Earnings Conference Call February 28, 2017 8:30 AM ET	Good morning, ladies and gentlemen, and welcome to the PrairieSky Royalty announces their Fourth Quarter and Year End 2016 Financial Results Conference Call. At this time, all participants are in a listen-only mode. Later, we will conduct a question- and-answer session and instructions will follow at that time. [Operator Instructions] As a reminder, this conference call is being recorded. I would…	1
346	50.pdf	American Woodmark Corporation (NASDAQ:AMWD) Q3 2017 Earnings Conference Call February 27, 2017 11:00 AM ET	Analysts Tim Wojs - Robert W. Baird Nick Coppola - Thompson Research Group Dennis McGill - Zelman & Associates https://seekingalpha.com/article/4050157-american-woodmarks-amwd-ceo-cary-dunston-on-q3-2017-results-earnings-call-transcript 1/15 12/4/21, 10:37 AM American Woodmark's (AMWD) CEO Cary Dunston on Q3 2017 Results - Earnings Call Transcript _ Seeking Alpha Operator Good day, and welcome to…	0
347	52.pdf	TC PipeLines, LP (NYSE:TCP) Q4 2016 Earnings Conference Call February 27, 2017 10:00 AM ET	Jeremy Tonet - JPMorgan Shneur Gershuni - UBS Nick Raza - Citigroup Gabriel Moreen - Bank of America Merrill Lynch Operator Good day, ladies and gentlemen and welcome to the TC PipeLines, LP 2016 Fourth Quarter Results Conference Call. https://seekingalpha.com/article/4050142-tc-pipelines-tcp-q4-2016-results-earnings-call-transcript 1/20 12/4/21, 5:37 PM TC PipeLines' (TCP) Q4 2016 Results - Earn…	0
348	53.pdf	China Cord Blood Corporation (NYSE:CO) Q3 2017 Earnings Conference Call February Kathy Bian - VP, Corporate Finance	Operator and-answer session. presentation. Please go ahead. Kathy Bian Welcome everyone to China Cord Blood Corporation's Earnings Conference Call for the Third Quarter of Fiscal 2017. Today's conference is being recorded. All participants' lines will be placed on mute during the presentation after which there will be a question- Now I would like to introduce Ms. Kathy Bian, VP of Corporate Finan…	0
349	54.pdf	UCP, LLC (NYSE:UCP) Q4 2016 Earnings Conference Call February 27, 2017 12:00 PM ET	Alan Ratner - Zelman & Associates Will Randow - Citigroup Alex Barron - Housing Research Center Operator Greetings, and welcome to the UCP's Fourth Quarter and Full-Year 2016 Earnings Conference Call. At this time, all participants are in a listen-only mode. A question-and- answer session will follow the formal presentation. [Operator Instructions]. As a reminder this conference is being recorded…	0
350	55.pdf	Senior Housing Properties Trust. (SNH) Q4 2016 Results Earnings Conference Call February 27, 2017 10:00 AM ET	Rick Siedel - CFO and Treasurer Analysts Michael Carroll - RBC Capital Markets Bryan Maher - FBR & Company https://seekingalpha.com/article/4050137-senior-housing-properties-trust-snh-q4-2016-results-earnings-call-transcript 1/16 12/4/21, 5:39 PM Operator Senior Housing Properties Trust (SNH) Q4 2016 Results - Earnings Call Transcript _ Seeking Alpha Good morning. And welcome to the Senior Housin…	0
351	56.pdf	Sotheby's (NYSE:BID) Q4 2016 Earnings Conference Call February 27, 2017 9:00 AM ET	Jason Kreyer - Craig-Hallum Oliver Chen - Cowen and Company Dan Moore - CJS Securities David Schick - Consumer Edge Research William Reuter - Bank of America Merrill Lynch Operator https://seekingalpha.com/article/4050134-sothebys-bid-ceo-thomas-smith-on-q4-2016-results-earnings-call-transcript 1/25 12/4/21, 5:42 PM Operator Sotheby's (BID) CEO Thomas Smith on Q4 2016 Results - Earnings Call Tran…	1
352	57.pdf	Horizon Pharma Plc (NASDAQ:HZNP) Q4 2016 Earnings Conference Call February 27, 2017 8:00 AM ET	Timothy Walbert - Chairman, President and Chief Executive Officer Paul Hoelscher - Executive Vice President and Chief Financial Officer Jeffrey Sherman - Executive Vice President, Research and Development and Chief Medical Officer Dave Happel - Executive Vice President, Global Orphan Business Unit Robert Carey - Executive Vice President and Chief Business Officer https://seekingalpha.com/article/…	0
353	58.pdf	Altra Industrial Motion Corporation (NASDAQ:AIMC) Q4 2016 Earnings Conference Call February 27, 2017 10:00 AM ET	Christian Storch - Chief Financial Officer Andrew Blazier - IR, Sharon Merrill Analysts Scott Graham - BMO Capital Markets Jeff Hammond - KeyBanc Capital Markets https://seekingalpha.com/article/4050117-altra-industrial-motions-aimc-ceo-carl-christenson-on-q4-2016-results-earnings-call 1/19 12/4/21, 5:45 PM Altra Industrial Motion's (AIMC) CEO Carl Christenson on Q4 2016 Results - Earnings Call T…	0
354	59.pdf	Northwest Natural Gas Company (NYSE:NWN) Q4 2016 Earnings Conference Call February 27, 2017 11:00 AM ET	Brody Wilson - Chief Financial Officer and Treasurer Dave Weber - Chief Executive Officer of Northwest Natural Gas Storage LLC and Gill Ranch Storage LLC Analysts Tate Sullivan - Sidoti https://seekingalpha.com/article/4050109-northwest-natural-gas-nwn-ceo-david-anderson-on-q4-2016-results-earnings-call-transcript 1/18 12/4/21, 5:47 PM Northwest Natural Gas' (NWN) CEO David Anderson on Q4 2016 Re…	1
355	6.pdf	NewLink Genetics Corp (NLNK) Q4 2016 Earnings Conference Call February 28, 2017 8:30 AM ET	Mara Goldstein - Cantor Fitzgerald Peter Lawson - SunTrust Robinson Humphrey Operator Good day, ladies and gentlemen. And welcome to the NewLink Genetics Fourth Quarter 2016 Earnings Conference Call. At this time, all participants are in a listen-only mode. Later, we will conduct a question-and-answer session, and instructions will follow at that time As a reminder this conference call is being r…	0
356	61.pdf	Syrah Resources Limited (OTCPK:SYAAF) March Quarterly Sales and Marketing Update Conference Call April 28, 2017 8:30 PM ET	Peter Lee - Manager of Investor Relations Analysts Michael Slifirski - Credit Suisse Rahul Anand - Morgan Stanley Reg Spencer Canaccord https://seekingalpha.com/article/4067221-syrah-resources-syaaf-ceo-shaun-verner-on-march-quarterly-sales-and-marketing-update 1/37 12/4/21, 5:54 PM Syrah Resources' (SYAAF) CEO Shaun Verner on March Quarterly Sales and Marketing Update Conference Call (Transcript…	0
357	62.pdf	Toromont Industries Ltd. (OTCPK:TMTNF) Q1 2017 Earnings Conference Call April 27, 2017 8:00 AM ET	Sara O'Brien - RBC Ben Cherniavsky - Raymond James Jacob Bout - CIBC World Maxim Sytchev - National Bank Financial Operator Good morning ladies and gentlemen My name is Shannon and I will be your https://seekingalpha.com/article/4067220-toromont-industries-tmtnf-ceo-scott-medhurst-on-q1-2017-results-earnings-call-transcript 1/18 12/4/21, 5:54 PM Toromont Industries' (TMTNF) CEO Scott Medhurst on …	0
358	63.pdf	Sun Bancorp, Inc. (NASDAQ:SNBC) Q1 2017 Results Conference Call April 28, 2017 11:00 AM ET	Operator management's team. Thomas O'Brien Sun Bancorp, Inc. First Quarter 2017 Analyst Call will now begin. This call is being recorded. On the line for Sun Bancorp are Thomas O'Brien, President and Chief Executive Officer; Tom Brugger, Chief Financial Officer; and other members of Sun's https://seekingalpha.com/article/4067219-sun-bancorps-snbc-ceo-thomas-obrien-on-q1-2017-results-earnings-call…	0
359	64.pdf	Potlatch Corporation (NASDAQ:PCH) Q1 2017 Results Conference Call April 27, 2017 12:00 PM ET	Eric Cremers - President and COO Analysts George Staphos - Bank of America Collin Mings - Raymond James https://seekingalpha.com/article/4067218-potlatch-corporations-pch-ceo-michael-covey-on-q1-2017-results-earnings-call-transcript 1/20 12/4/21, 5:55 PM Potlatch Corporation's (PCH) CEO Michael Covey on Q1 2017 Results - Earnings Call Transcript _ Seeking Alpha Gail Glazerman - Roe Equity Researc…	1
360	65.pdf	Silicom Ltd (NASDAQ:SILC) Q1 2017 Earnings Conference Call April 27, 2017 9:00 AM ET Executives	Analysts Alex Henderson - Needham and Company Edward Balinsky - Segmark Aria Cole - Cole Capital https://seekingalpha.com/article/4067217-silicoms-silc-ceo-shaike-orbach-on-q1-2017-results-earnings-call-transcript 1/27 12/4/21, 5:55 PM Aria Cole Cole Capital Silicom's (SILC) CEO Shaike Orbach on Q1 2017 Results - Earnings Call Transcript _ Seeking Alpha Chip Saye - AWH Capital Don McKiernan - Lan…	0
361	66.pdf	Methanex Corp. (NASDAQ:MEOH) Q1 2017 Results Conference Call April 27, 2017 12:00 PM ET Executives	Steve Hansen - Raymond James Joel Jackson - BMO Capital Markets Jacob Bout - CIBC Cherilyn Radbourne - TD Securities https://seekingalpha.com/article/4067216-methanexs-meoh-ceo-john-floren-on-q1-2017-results-earnings-call-transcript 1/24 12/4/21, 5:55 PM Methanex's (MEOH) CEO John Floren on Q1 2017 Results - Earnings Call Transcript _ Seeking Alpha Cherilyn Radbourne TD Securities John Roberts - …	0
362	67.pdf	Photon Control Inc. (OTCPK:POCEF) Q4 2016 Earnings Conference Call April 27, 2017 11:00 AM ET	Operator Good afternoon. Welcome to Photon Control's Fourth Quarter and Full Year 2016 Earnings Conference Call. Joining us for today's call are Photon Control's CEO, Scott Edmonds; Board Chair, Neil McDonnell; and CFO, Gerald Adams. Following their remarks, we will open up the call for your questions. Certain statements made by management on today's call constitute forward-looking statements or …	1
363	68.pdf	Constellium Holdco B.V. (NYSE:CSTM) Q1 2017 Results Conference Call April 27, 2017 11:00 AM ET Executives	Analysts Curtis Woodworth - Crédit Suisse Han Zhang - Cowen and Company Christian Georges - Societe Generale https://seekingalpha.com/article/4067214-constellium-holdcos-cstm-ceo-jean-marc-germain-on-q1-2017-results-earnings-call-transcript 1/26 12/4/21, 5:56 PM Constellium Holdco's (CSTM) CEO Jean-Marc Germain on Q1 2017 Results - Earnings Call Transcript _ Seeking Alpha Christian Georges Societ…	1
364	69.pdf	Tyler Technologies, Inc. (NYSE:TYL) Q1 2017 Earnings Conference Call April 27, 2017 10:00 AM ET	Lynn Moore - President Analysts Charles Strauzer - CJS Securities Kirk Materne - Evercore ISI https://seekingalpha.com/article/4067213-tyler-technologies-tyl-ceo-john-marr-on-q1-2017-results-earnings-call-transcript 1/26 12/4/21, 5:56 PM Tyler Technologies' (TYL) CEO John Marr on Q1 2017 Results - Earnings Call Transcript _ Seeking Alpha Aleksandr Zukin - Piper Jaffray Companies Scott Berg - Need…	1
365	7.pdf	Erste Group Bank AG (OTCPK:EBKOF) Q4 2016 Earnings Conference Call February 28, 2017 5:00 AM ET	Peter Bosek - Member of the Management Board for Retail Jozef Síkela - Member of the Management Board for Corporate Banking and Markets https://seekingalpha.com/article/4050445-erste-group-banks-ebkof-ceo-andreas-treichl-on-q4-2016-results-earnings-call-transcript 1/20 12/4/21, 12:07 AM Erste Group Bank's (EBKOF) CEO Andreas Treichl on Q4 2016 Results - Earnings Call Transcript _ Seeking Alpha La…	0
366	70.pdf	Domtar Corp. (NYSE:UFS) Q1 2017 Results Conference Call April 27, 2017 10:00 AM ET	John Babcock - Bank of America Merrill Lynch Paul Quinn - RBC Capital Markets Randy Toth - Citi Operator Good day, ladies and gentlemen, and welcome to the Domtar Corporation's First Quarter 2017 Earnings Financial Results Conference Call. All this time, all participants https://seekingalpha.com/article/4067212-domtars-ufs-ceo-john-williams-on-q1-2017-results-earnings-call-transcript 1/15 12/4/21…	0
367	71.pdf	Super Micro Computer, Inc. (NASDAQ:SMCI) Q3 2017 Earnings Conference Call April 27, 2017 5:00 PM ET	Howard Hideshima - CFO and SVP Analysts Joseph Quatrochi - Stifel, Nicolaus & Company Mark Kelleher - D.A. Davidson & Co. https://seekingalpha.com/article/4067211-super-micro-computers-smci-ceo-charles-liang-on-q3-2017-results-earnings-call-transcript 1/19 12/4/21, 5:57 PM Super Micro Computer's (SMCI) CEO Charles Liang on Q3 2017 Results - Earnings Call Transcript _ Seeking Alpha David Ryzhik - …	0
368	72.pdf	Vale SA (NYSE:VALE) Q1 2017 Results Conference Call April 27, 2017 11:00 AM ET	Humberto Freitas - Executive Officer of Logistics and Mineral Research Jennifer Maki - Executive Officer of Base Metals Clovis Torres - Executive Officer of Human Resources, Sustainability, Compliance and General Counsel Analysts https://seekingalpha.com/article/4067210-vales-vale-ceo-murilo-ferreira-on-q1-2017-results-earnings-call-transcript 1/16 Vale's (VALE) CEO Murilo Ferreira on Q1 2017 Res…	1
369	73.pdf	PCM, Inc. (NASDAQ:PCMI) Q1 2017 Earnings Conference Call April 27, 2017 4:30 PM ET	William Gibson - Roth Capital Partners Kara Anderson - B. Riley & Co. Bill Dawkins - Burleson Dawkins, Inc. Jeff Feinberg - Fienberg Investments Operator Welcome to the first quarter 2017 PCM, Inc. earnings conference call. My name is Andrew and I will be your coordinator for today. [Operator Instructions]. As a reminder, https://seekingalpha.com/article/4067209-pcms-pcmi-ceo-frank-khulusi-on-q1-…	0
370	74.pdf	Old Second Bancorp, Inc. (NASDAQ:OSBC) Q1 2017 Earnings Conference Call April 27, 2017 11:00 AM ET	Michael Kozak - Chief Credit Officer and EVP Analysts Christopher McGratty - KBW Andrew Liesch - Sandler O'Neill https://seekingalpha.com/article/4067208-old-second-bancorps-osbc-ceo-james-eccher-on-q1-2017-results-earnings-call-transcript 1/15 12/4/21, 5:58 PM Old Second Bancorp's (OSBC) CEO James Eccher on Q1 2017 Results - Earnings Call Transcript _ Seeking Alpha Brian Martin - FIG Partners Op…	0
371	75.pdf	Mobile Mini, Inc. (NASDAQ:MINI) Q1 2017 Earnings Conference Call April 27, 2017 12:00 PM ET	Scott Schneeberger - Oppenheimer Marc Riddick - Sidoti & Company Sean Wondrack - Deutsche Bank Operator Douglas Mewhirter - SunTrust Robinson Humphrey Welcome to the Mobile Mini 2017 First Quarter Conference Call At this time I would like https://seekingalpha.com/article/4067207-mobile-minis-mini-ceo-erik-olsson-on-q1-2017-results-earnings-call-transcript 1/22 12/4/21, 5:58 PM Mobile Mini's (MINI…	0
372	76.pdf	Gruma SAB de CV (OTC:GMKYY) Q1 2017 Earnings Conference Call April 27, 2017 11:30 AM ET	Luis Miranda - Santander Luca Cipiccia - Goldman Sachs Alex Robarts - Citibank Pedro Leduc - JPMorgan Alvaro Garcia - BTG Pactual Operator Welcome to Gruma's First Quarter 2017 Earnings Conference Call https://seekingalpha.com/article/4067206-grumas-gmkyy-on-q1-2017-results-earnings-call-transcript [Operator 1/17 12/4/21, 5:58 PM Gruma's (GMKYY) on Q1 2017 Results - Earnings Call Transcript _ See…	1
373	77.pdf	Wacker Chemie AG (OTC:WKCMF) Q1 2017 Results Conference Call April 27, 2017 10:00 AM ET	Patrick Rafaisz - UBS Chetan Udeshi - JP Morgan Andrew Heap - Berenberg Gurpreet Gujral - Macquarie Research Sean McLoughlin - HSBC Thomas Swoboda Societe Generale https://seekingalpha.com/article/4067205-wacker-chemies-wkcmf-ceo-rudolf-staudigl-on-q1-2017-results-earnings-call-transcript 1/25 12/4/21, 5:58 PM Wacker Chemie's (WKCMF) CEO Rudolf Staudigl on Q1 2017 Results - Earnings Call Transcri…	0
374	78.pdf	Landmark Bancorp, Inc. (NASDAQ:LARK) Q1 2017 Earnings Conference Call April 27, 2017 11:00 AM ET	Welcome to the Landmark Bancorp Q1 Earnings Conference Call. [Operator Instructions]. I would like to turn the conference over to Michael Scheopner, President and Chief Executive Officer. Please go ahead. Michael Scheopner 31, 2017. Thank you and good morning. I appreciate everyone taking the time today to join us to discuss Landmark's earnings and results of operations for the first quarter endi…	1
375	79.pdf	Lantronix, Inc. (NASDAQ:LTRX) Q3 2017 Earnings Conference Call April 27, 2017 5:00 PM ET	Operator Jeffrey Benck - CEO, President and Director Jeremy Whitaker - Chief Financial Officer Jaeson Schmidt - Lake Street Capital Markets https://seekingalpha.com/article/4067203-lantronixs-ltrx-ceo-jeffrey-benck-on-q3-2017-results-earnings-call-transcript 1/12 12/4/21, 5:59 PM Lantronix's (LTRX) CEO Jeffrey Benck on Q3 2017 Results - Earnings Call Transcript _ Seeking Alpha Welcome the Lantron…	0
376	8.pdf	Drive Shack Inc (NYSE:DS) Q4 2016 Earnings Conference Call February 28, 2017 8:00 AM ET	George Kelly - Imperial Capital Larry Goodfield - Chief Financial Officer and Chief Accounting Officer Good morning. My name is Carol and I will be your conference operator today. At this time, I would like to welcome everyone to Drive Shack’s Fourth Quarter and Full Year 2016 Earnings Call. [Operator Instructions] At this time, I would now like to turn the call over to BoHee Yoon. BoHee Yoon htt…	1
377	80.pdf	First Merchants Corp (NASDAQ:FRME) Q1 2017 Earnings Conference Call April 27, 2017 2:30 PM ET	John Martin - Chief Credit Officer and EVP Analysts Kevin Reevey - D.A. Davidson & Co. Erik Zwick - Stephens Inc. https://seekingalpha.com/article/4067202-first-merchants-frme-ceo-michael-rechin-on-q1-2017-results-earnings-call-transcript 1/19 12/4/21, 5:59 PM First Merchants' (FRME) CEO Michael Rechin on Q1 2017 Results - Earnings Call Transcript _ Seeking Alpha Damon DelMonte - KBW Brian Martin…	1
378	81.pdf	NIKE, Inc. (NYSE:NKE) Q4 2017 Earnings Conference Call June 29, 2017 5:00 PM ET Executives	Andy Campion - Chief Financial Officer Analysts Corrina Van Der Ghinst - Citi Omar Saad - Evercore ISI Bob Drbul - Guggenheim https://seekingalpha.com/article/4085009-nikes-nke-ceo-mark-parker-on-q4-2017-results-earnings-call-transcript 1/31 12/4/21, 6:01 PM NIKE's (NKE) CEO Mark Parker on Q4 2017 Results - Earnings Call Transcript _ Seeking Alpha Jim Duffy - Stifel Matthew McClintock - Barclays …	0
379	82.pdf	EXFO Inc. (NASDAQ:EXFO) Q3 2017 Earnings Conference Call June 29, 2017 5:00 PM ET	Tim Savageaux - Northland Capital Markets Justin Keywood - GMP Securities Richard Tse - National Bank Financial Todd Coupland - CIBC Robert Young - Canaccord Genuity Operator https://seekingalpha.com/article/4085006-exfos-exfo-ceo-philippe-morin-on-q3-2017-results-earnings-call-transcript 1/23 12/4/21, 6:01 PM Operator EXFO's (EXFO) CEO Philippe Morin on Q3 2017 Results - Earnings Call Transcript…	0
380	83.pdf	American Outdoor Brands Corporation (AOBC) Q4 2017 Earnings Conference Call June 29, 2017 5:00 PM ET	Jeffrey Buchanan - Executive Vice President, Chief Financial Officer, Chief Administrative Officer, and Treasurer Analysts Cai von Rumohr - Cowen & Company Greg Konrad - Jefferies LLC https://seekingalpha.com/article/4085003-american-outdoor-brands-aobc-ceo-james-debney-on-q4-2017-results-earnings-call-transcript 1/27 12/4/21, 6:01 PM g American Outdoor Brands' (AOBC) CEO James Debney on Q4 2017 …	0
381	84.pdf	8point3 Energy Partners LP (NASDAQ:CAFD) Q2 2017 Earnings Conference Call June 29, 2017 4:30 PM ET	Tyler Frank - Robert W. Baird Pavel Molchanov - Raymond James Chirag Odhav - Bank of America Merrill Lynch Justin Clare - ROTH Capital Partners Mark Strouse - JPMorgan Rachel Lei Deutsche Bank https://seekingalpha.com/article/4085002-8point3-energy-partners-cafd-ceo-chuck-boynton-on-q2-2017-results-earnings-call-transcript 1/18 12/4/21, 6:01 PM 8Point3 Energy Partners' (CAFD) CEO Chuck Boynton on…	1
382	85.pdf	Micron Technology Inc. (NASDAQ:MU) Q3 2017 Results Earnings Conference Call June 29, 2017 4:30 PM ET	Ernest Maddock - CFO Analysts Harlan Sur - JPMorgan Wayne Low - Citi https://seekingalpha.com/article/4084997-micron-technologys-mu-ceo-sanjay-mehrotra-on-q3-2017-results-earnings-call-transcript 1/31 12/4/21, 6:02 PM Micron Technology's (MU) CEO Sanjay Mehrotra on Q3 2017 Results - Earnings Call Transcript _ Seeking Alpha Mark Delaney - Goldman Sachs David Wong - Wells Fargo Kevin Cassidy - Stif…	0
383	86.pdf	Cinedigm Corp (NASDAQ:CIDM) Q4 2017 Earnings Conference Call June 29, 2017 4:30 PM ET	Operator Terry Hackett - Hackett Management Dick Rolfe - Dove Foundation Good day, ladies and gentlemen. And welcome to the Cinedigm Corp Fourth Quarter 2017 Fiscal Earnings Call. At this time, all participants are in listen-only mode. Later we will conduct the question-and-answer session, and instructions will follow at that time [Operator Instructions] As a reminder this call is being recorded …	0
384	87.pdf	Walgreens Boots Alliance, Inc. (NASDAQ:WBA) Q3 2017 Earnings Conference Call June 29, 2017 8:30 AM ET	Stefano Pessina - Executive Vice Chairman and CEO George Fairweather - EVP and Global CFO Alexander Gourlay - Co COO Marco Pagni - EVP, Global CAO, General Counsel Analysts https://seekingalpha.com/article/4084981-walgreens-boots-alliances-wba-ceo-stefano-pessina-on-q3-2017-results-earnings-call-transcript 1/37 12/4/21, 6:02 PM Walgreens Boots Alliance's (WBA) CEO Stefano Pessina on Q3 2017 Resul…	0
385	88.pdf	ConAgra Brands, Inc. (NYSE:CAG) Q4 2017 Earnings Conference Call June 29, 2017 9:30 AM ET	Sean Connolly - President and Chief Executive Officer Dave Marberger - Chief Financial Officer Analysts Andrew Lazar - Barclays Capital David Driscoll - Citi Research https://seekingalpha.com/article/4084979-conagra-foods-cag-ceo-sean-connolly-on-q4-2017-results-earnings-call-transcript 1/34 12/4/21, 6:03 PM ConAgra Foods' (CAG) CEO Sean Connolly on Q4 2017 Results - Earnings Call Transcript _ Se…	0
386	89.pdf	U.S. Physical Therapy, Inc (NYSE:USPH) Q3 2017 Earnings Conference Call November 2, 2017 10:30 AM ET	Jon Bates - VP & Corporate Controller Lawrance McAfee - Executive VP, CFO & Director Glenn McDowell - COO Analysts Lawrence Solow - CJS Securities https://seekingalpha.com/article/4120556-u-s-physical-therapys-usph-ceo-christopher-reading-on-q3-2017-results-earnings-call 1/14 12/4/21, 6:03 PM U.S. Physical Therapy's (USPH) CEO Christopher Reading on Q3 2017 Results - Earnings Call Transcript _ Se…	1
387	9.pdf	Delek Logistics Partners LP (NYSE:DKL) Q4 2016 Results Earnings Conference Call February 28, 2017 8:00 AM ET	Assi Ginzburg - CFO Danny Norris - CAO Mark Smith - EVP Analysts https://seekingalpha.com/article/4050414-delek-logistics-partners-dkl-ceo-uzi-yemin-on-q4-2016-results-earnings-call-transcript 1/7 12/4/21, 12:08 AM Delek Logistics Partners' (DKL) CEO Uzi Yemin on Q4 2016 Results - Earnings Call Transcript _ Seeking Alpha Operator Good morning. My name is Karina, and I’ll be your conference operat…	0
388	90.pdf	A. Schulman, Inc. (NASDAQ:SHLM) Q3 2017 Earnings Conference Call June 29, 2017 10:00 AM ET	Dmitry Silversteyn - Longbow Research Rosemarie Morbelli - Gabelli & Company Jacob Schowalter - Seaport Global Jason Freuchtel - SunTrust Robinson Humphrey Chris Ryan - Bank of America Operator https://seekingalpha.com/article/4084970-schulmans-shlm-ceo-joseph-gingo-on-q3-2017-results-earnings-call-transcript 1/31 12/4/21, 6:03 PM Operator A. Schulman's (SHLM) CEO Joseph Gingo on Q3 2017 Results …	0
389	91.pdf	Constellation Brands, Inc. (NYSE:STZ) Q1 2018 Earnings Conference Call June 29, 2017 10:30 AM ET	David Klein - EVP and CFO Analysts Dara Mohsenian - Morgan Stanley Vivien Azer - Cowen https://seekingalpha.com/article/4084958-constellation-brands-stz-ceo-robert-sands-on-q1-2018-results-earnings-call-transcript 1/27 12/4/21, 6:04 PM Constellation Brands' (STZ) CEO Robert Sands on Q1 2018 Results - Earnings Call Transcript _ Seeking Alpha Nik Modi - RBC Capital Markets Judy Hong - Goldman Sachs…	0
390	92.pdf	The Greenbrier Companies, Inc. (NYSE:GBX) Q3 2017 Results Earnings Conference Call June 29, 2017 11:00 AM ET	William Furman - Chairman and CEO Analysts Justin Long - Stephens & Company Matt Elkott - Cowen & Company Ari Rosa - Bank of America https://seekingalpha.com/article/4084949-greenbrier-companies-gbx-ceo-william-furman-on-q3-2017-results-earnings-call-transcript 1/26 12/4/21, 6:04 PM The Greenbrier Companies' (GBX) CEO William Furman on Q3 2017 Results - Earnings Call Transcript _ Seeking Alpha St…	1
391	93.pdf	HB Fuller, Co. (NYSE:FUL) Q2 2017 Earnings Conference Call June 29, 2017 10:30 AM ET	John Corkrean - CFO and EVP Analysts Michael Sison - KeyBanc Capital Markets Eric Petrie - Citigroup https://seekingalpha.com/article/4084894-hb-fullers-ful-ceo-james-owens-on-q2-2017-results-earnings-call-transcript 1/17 12/4/21, 6:05 PM HB Fuller's (FUL) CEO James Owens on Q2 2017 Results - Earnings Call Transcript _ Seeking Alpha Michael Harrison - Seaport Global Securities Jeffrey Zekauskas -…	0
392	94.pdf	Acuity Brands, Inc. (NYSE:AYI) Q3 2017 Earnings Conference Call June 29, 2017 10:00 AM ET	Josh Chan - Baird Brian Lee - Goldman Sachs Christopher Glynn - Oppenheimer John Walsh - Vertical Research Cindy Motz - Williams Capital Group Operator https://seekingalpha.com/article/4084888-acuity-brands-ayi-ceo-vern-nagel-on-q3-2017-results-earnings-call-transcript 1/29 12/4/21, 6:05 PM Operator Acuity Brands' (AYI) CEO Vern Nagel on Q3 2017 Results - Earnings Call Transcript _ Seeking Alpha …	0
393	95.pdf	Lindsay Corporation (NYSE:LNN) Q3 2017 Results Earnings Conference Call June 29, 2017 11:00 AM ET	Analysts Jordan Bender - Seaport Global Brian Drab - William Blair Tyler Etten - Piper Jaffray Joseph Mondillo - Sidoti & Company https://seekingalpha.com/article/4084879-lindsays-lnn-ceo-rick-parod-on-q3-2017-results-earnings-call-transcript G G & C 1/19 12/4/21, 6:05 PM Lindsay's (LNN) CEO Rick Parod on Q3 2017 Results - Earnings Call Transcript _ Seeking Alpha Jose Garza - Gabelli & Company Op…	0
394	96.pdf	Investors Real Estate Trust (IRET) Q4 2017 Earnings Conference Call June 29, 2017 10:00 AM ET	John Kirchmann - Executive Vice President and Chief Financial Officer Anne Olson - Executive Vice President and General Counsel Andrew Martin - Executive Vice President of Operations Analysts https://seekingalpha.com/article/4084870-investors-real-estate-trusts-iret-ceo-mark-decker-on-q4-2017-results-earnings-call-transcript 1/15 12/4/21, 6:06 PM Investors Real Estate Trust's (IRET) CEO Mark Deck…	1
395	97.pdf	McCormick & Company, Inc. (NYSE:MKC) Q2 2017 Earnings Conference Call June 29, 2017 8:00 AM ET	Lawrence Kurzius - Chairman, President and Chief Executive Officer Mike Smith - Executive Vice President and Chief Financial Officer Analysts Robert Moskow - Credit Suisse Ken Goldman - JPMorgan https://seekingalpha.com/article/4084855-mccormick-and-companys-mkc-ceo-lawrence-kurzius-on-q2-2017-results-earnings-call-transcript 1/33 12/4/21, 6:06 PM McCormick & Company's (MKC) CEO Lawrence Kurzius …	1
396	98.pdf	Malibu Boats, Inc. (NASDAQ:MBUU) Malibu Acquisition Announcement Conference Call June 29, 2017 8:30 AM ET	Tim Conder - Wells Fargo Securities Joe Altobello - Raymond James Jimmy Baker - B. Riley & Company Gerrick Johnson - BMO Capital Markets Operator https://seekingalpha.com/article/4084846-malibu-boats-mbuu-ceo-jack-springer-on-malibu-acquisition-announcement-conference-call 1/13 12/4/21, 6:06 PM Malibu Boats' (MBUU) CEO Jack Springer on Malibu Acquisition Announcement Conference Call (Transcript) …	0
397	99.pdf	Worthington Industries, Inc. (NYSE:WOR) Q4 2017 Earnings Conference Call June 29, 2017 10:30 AM ET	John McConnell - Chairman and CEO Andy Rose - EVP and CFO Mark Russell - President and COO Analysts Martin Engler - Jefferies https://seekingalpha.com/article/4084833-worthington-industries-wor-ceo-john-mcconnell-on-q4-2017-results-earnings-call-transcript 1/13 12/4/21, 6:07 PM Worthington Industries' (WOR) CEO John McConnell on Q4 2017 Results - Earnings Call Transcript _ Seeking Alpha Tyler Ken…	0
398	10.pdf	Erste Group Bank AG. (OTCPK:EBKOF) Q4 2017 Earnings Conference Call February 28, 2018 3:00 AM ET	Pawel Dziedzic - Goldman Sachs Anna Marshall - JPMorgan Gabor Kemeny - Autonomous Research Matthew Nance - UBS Riccardo Rovere - Mediobanca Johannes Thormann HSBC https://seekingalpha.com/article/4151652-erste-group-banks-ebkof-ceo-andreas-treichl-on-q4-2017-results-earnings-call-transcript 1/24 12/4/21, 6:17 PM Erste Group Bank's (EBKOF) CEO Andreas Treichl on Q4 2017 Results - Earnings Call Tra…	0
399	100.pdf	Harvest One Cannabis Inc. (OTCQB:HRVOF) Harvest One Year-in-Review & Corporate Update Conference Call December 20, 2018 2:00 PM ET	on this call today. Hi, everyone. My name is Grant Froese, the CEO of Harvest One, and I’m here with Andy Kain, who is our Chief Operating Officer. And we want to thank you for joining us This is my first opportunity to speak to you as the new of CEO of Harvest One. I joined the Company -- I should say we joined the Company five months ago, primarily because I felt Harvest One had a solid foundat…	0
400	101.pdf	Carnival plc (NYSE:CUK) Q4 2018 Earnings Conference Call December 20, 2018 10:00 AM ET	Arnold Donald - President and CEO Micky Arison - Chairman David Bernstein - CFO Analysts Felicia Hendrix - Barclays https://seekingalpha.com/article/4229524-carnival-plc-cuk-ceo-arnold-donald-on-q4-2018-results-earnings-call-transcript 1/29 12/4/21, 6:51 PM Carnival plc (CUK) CEO Arnold Donald on Q4 2018 Results - Earnings Call Transcript _ Seeking Alpha David Beckel - Bernstein Research Harry Cu…	0
401	11.pdf	TriNet Group, Inc. (NYSE:TNET) Q4 2017 Earnings Call February 27, 2018 5:00 PM ET Executives	David Michael Grossman - Stifel, Nicolaus & Co., Inc. Trevor Romeo - William Blair & Co. LLC Tien-Tsin Huang - JPMorgan Securities LLC Analysts Operator https://seekingalpha.com/article/4151607-trinet-group-tnet-q4-2017-results-earnings-call-transcript 1/15 12/4/21, 6:19 PM TriNet Group (TNET) Q4 2017 Results - Earnings Call Transcript _ Seeking Alpha Good afternoon. And welcome to the TriNet Gro…	0
402	12.pdf	Panoro Energy ASA (OTC:PESAF) Q4 2017 Earnings Conference Call February 28, 2018 3:30 AM ET	you. Good morning, ladies and gentlemen, and welcome to the Panoro Energy Q4 Results Call. My name is Mark and I'll be your coordinator for today's event. For the duration on the call, your lines will be on listen-only. However, you will have the opportunity to ask questions later in the call. [Operator Instructions] I will now hand over to your host, John Hamilton to begin today's conference. Th…	1
403	13.pdf	HFF, Inc. (NYSE:HF) Q4 2017 Earnings Conference Call February 27, 2018 6:00 PM ET	Operator Good evening and welcome to the HFF Inc., Fourth Quarter 2017 Conference Call. At this time all participants are in a listen-only mode. Later we will conduct a question-and- answer session and instructions will be given at that time. As a reminder, this conference call is being recorded. I would now like to turn the call over to your host, Ms. Myra Moren, HFF's Director of Investor Relat…	1
404	14.pdf	Carter's, Inc. (NYSE:CRI) Q4 2017 Earnings Call February 27, 2018 8:30 AM ET	Brian J. Lynch - Carter's, Inc. Analysts Kate McShane - Citigroup Global Markets, Inc. Ike Boruchow - Wells Fargo Securities LLC Susan Anderson - B. Riley FBR, Inc. Bill Schultz - Goldman Sachs & Co. LLC https://seekingalpha.com/article/4151550-carters-cri-q4-2017-results-earnings-call-transcript 1/32 12/4/21, 6:21 PM Carter's (CRI) Q4 2017 Results - Earnings Call Transcript _ Seeking Alpha Anna …	1
405	15.pdf	Balchem Corporation (NASDAQ:BCPC) Q4 2017 Earnings Conference Call February 28, 2018 11:00 AM ET	Bill Backus - Chief Accounting Officer Analysts Francesco Pellegrino - Sidoti & Company Brett Hundley - The Vertical Group https://seekingalpha.com/article/4151537-balchem-corporation-bcpc-ceo-ted-harris-on-q4-2017-results-earnings-call-transcript 1/24 12/4/21, 6:21 PM Balchem Corporation (BCPC) CEO Ted Harris on Q4 2017 Results - Earnings Call Transcript _ Seeking Alpha Hamed Khorsand - BWS Fina…	1
406	16.pdf	Resonant (NASDAQ:RESN) Q4 2017 Earnings Conference Call February 27, 2018 5:00 PM ET	George Holmes - Chief Executive Officer Jeff Killian - Chief Financial Officer Analysts Cody Acree - Drexel Hamilton Kevin Dede - H.C. Wainright https://seekingalpha.com/article/4151521-resonants-resn-ceo-george-holmes-on-q4-2017-results-earnings-call-transcript 1/27 12/4/21, 6:22 PM Resonant's (RESN) CEO George Holmes on Q4 2017 Results - Earnings Call Transcript _ Seeking Alpha Operator Greetin…	0
407	17.pdf	Papa John's International, Inc. (NASDAQ:PZZA) Q4 2017 Earnings Call February 27, 2018 5:00 PM ET	Lance F. Tucker - Papa John's International, Inc. Brandon Rhoten - Papa John's International, Inc. Mike Nettles - Papa John's International, Inc. Analysts Alexander Russell Slagle - Jefferies LLC https://seekingalpha.com/article/4151515-papa-johns-international-pzza-q4-2017-results-earnings-call-transcript S G C 1/27 12/4/21, 6:22 PM Papa John's International (PZZA) Q4 2017 Results - Earnings Cal…	1
408	18.pdf	Inogen, Inc. (NASDAQ:INGN) Q4 2017 Earnings Conference Call February 27, 2018 4:30 PM ET	Scott Wilkinson - CEO and President Alison Bauerlein - Co-Founder, CFO, EVP, Finance Analysts Robert Marcus - JP Morgan Chase Margaret Kaczor - William Blair & Company https://seekingalpha.com/article/4151513-inogens-ingn-ceo-scott-wilkinson-on-q4-2017-results-earnings-call-transcript 1/25 12/4/21, 6:22 PM Inogen's (INGN) CEO Scott Wilkinson on Q4 2017 Results - Earnings Call Transcript _ Seeking…	0
409	19.pdf	TESARO, Inc. (NASDAQ:TSRO) Q4 2017 Earnings Conference Call February 27, 2018 4:15 PM ET	Steven Breazzano - Evercore ISI Alethia Young - Credit Suisse Srikripa Devarakonda - Citigroup James Birchenough - Wells Fargo Securities LLC Tony Butler - Guggenheim Partners Andrew Berens Morgan Stanley https://seekingalpha.com/article/4151512-tesaros-tsro-ceo-lonnie-moulder-on-q4-2017-results-earnings-call-transcript 1/38 12/4/21, 6:23 PM TESARO's (TSRO) CEO Lonnie Moulder on Q4 2017 Results -…	0
410	2.pdf	Sequential Brands Group, Inc. (SQBG) Q4 2017 Earnings Conference Call February 28, 2018 8:30 AM ET	Andrew Cooper - President & Interim CFO Steve Marotta - C.L. King & Associates Camilo Lyon - Canaccord Genuity Dave King - Roth Capital Partners https://seekingalpha.com/article/4151721-sequential-brands-groups-sqbg-ceo-karen-murray-on-q4-2017-results-earnings-call-transcript 1/16 12/4/21, 6:15 PM Sequential Brands Group's (SQBG) CEO Karen Murray on Q4 2017 Results - Earnings Call Transcript _ Se…	1
411	20.pdf	B&G Foods, Inc. (NYSE:BGS) Q4 2017 Earnings Call February 27, 2018 4:30 PM ET Executives	Analysts Farha Aslam - Stephens, Inc. Karru Martinson - Jefferies Bryan C. Hunt - Wells Fargo Securities LLC Cornell R. Burnette - Citigroup Global Markets, Inc. https://seekingalpha.com/article/4151511-b-and-g-foods-bgs-q4-2017-results-earnings-call-transcript 1/34 12/4/21, 6:23 PM B&G Foods (BGS) Q4 2017 Results - Earnings Call Transcript _ Seeking Alpha Ken Zaslow - BMO Capital Markets (United…	1
412	21.pdf	Beach Energy Ltd. (OTCPK:BEPTF) Q3 2018 Earnings Conference Call April 24, 2018 7:00 PM ET	Adam Martin - Morgan Stanley James Redfern - Merrill Lynch Andrew Hodge - Macquarie Ewe Jin Tan - Churchill Capital Unidentified Company Representative https://seekingalpha.com/article/4167519-beach-energys-beptf-ceo-matt-kay-on-q3-2018-results-earnings-call-transcript 1/24 12/4/21, 6:24 PM Beach Energy's (BEPTF) CEO Matt Kay on Q3 2018 Results - Earnings Call Transcript _ Seeking Alpha Thanks, C…	0
413	22.pdf	Taylor Wimpey Plc (OTCPK:TWODF) AMG Trading Update Conference Call April 26, 2018 3:30 AM ET	Will Jones - Redburn Jon Bell - Barclays Gregor Kuglitsch - UBS Clyde Lewis - Peel Hunt Kevin Cammack - Cenkos Peter Redfern https://seekingalpha.com/article/4167484-taylor-wimpeys-twodf-ceo-peter-redfern-on-agm-trading-update-call-transcript 1/20 12/4/21, 6:25 PM Peter Redfern Taylor Wimpey's (TWODF) CEO Peter Redfern on AGM Trading Update Call (Transcript) _ Seeking Alpha Thank you. Good mornin…	0
414	23.pdf	Digimarc Corporation (NASDAQ:DMRC) Q1 2018 Earnings Conference Call April 25, 2018 5:00 PM ET	Analysts Rob Stone - Cowen and Company Josh Nichols - B. Riley FBR Jim Ricchiuti - Needham & Company https://seekingalpha.com/article/4167413-digimarcs-dmrc-ceo-bruce-davis-on-q1-2018-results-earnings-call-transcript 1/24 12/4/21, 6:25 PM Digimarc's (DMRC) CEO Bruce Davis on Q1 2018 Results - Earnings Call Transcript _ Seeking Alpha Jeff Van Rhee - Craig-Hallum Operator Good afternoon and thank y…	0
415	24.pdf	Corporate Office Properties Trust (NYSE:OFC) Q1 2018 Earnings Conference Call April 27, 2018 12:00 PM ET	Steve Budorick - President and Chief Executive Officer Paul Adkins - Executive Vice President and Chief Operating Officer Anthony Mifsud - Executive Vice President and Chief Financial Officer Analysts Laura Dickson - KeyBanc Capital Markets https://seekingalpha.com/article/4167396-corporate-office-properties-trusts-ofc-ceo-steve-budorick-on-q1-2018-results-earnings-call 1/25 12/4/21, 6:25 PM Corp…	0
416	25.pdf	MBT Financial Corp (NASDAQ:MBTF) Q1 2018 Earnings Conference Call April 27, 2018 10:00 AM ET	Operator https://seekingalpha.com/article/4167394-mbt-financials-mbtf-ceo-doug-chaffin-on-q1-2018-results-earnings-call-transcript 1/13 12/4/21, 6:25 PM MBT Financial's (MBTF) CEO Doug Chaffin on Q1 2018 Results - Earnings Call Transcript _ Seeking Alpha Good morning and welcome to the MBT Financial Corp First Quarter 2018 Earnings Conference Call. [Operator Instructions] This discussion may cont…	0
417	26.pdf	Fuchs Petrolub SE (OTCPK:FUPEF) Q1 2018 Earnings Conference Call April 27, 2018 6:00 AM ET	Daniel Buchta - MainFirst Bank Knud Hinkel - Equinet Bank Operator Ladies and gentlemen, thank you for standing by. I'm Yasmine [ph], your conference call operator. Welcome and thank you for joining the Fuchs Petrolub's Analyst Conference Call. [Operator Instructions] I would now like to turn the conference over to Thomas Altmann Please go ahead https://seekingalpha.com/article/4167393-fuchs-petr…	0
418	27.pdf	Gulf Island Fabrication, Inc. (NASDAQ:GIFI) Q1 2018 Earnings Conference Call April 27, 2018 10:00 AM ET	Martin Malloy - Johnson Rice John Deysher - Pinnacle Jeff Geygan - Global Value Investment Corporation Operator Good morning and welcome ladies and gentlemen to the Q1 2018 Gulf Island Fabrication, Inc. Earnings Conference Call. [Operator Instructions] This call is being https://seekingalpha.com/article/4167392-gulf-island-fabrications-gifi-ceo-kirk-meche-on-q1-2018-results-earnings-call-transcri…	0
419	28.pdf	Investors Bancorp, Inc. (NASDAQ:ISBC) Q1 2018 Earnings Conference Call April 27, 2018 11:00 AM ET	Analysts Mark Fitzgibbon - Sandler O’Neill Dave Rochester - Deutsche Bank Austin Nicholas - Stephens Inc. https://seekingalpha.com/article/4167391-investors-bancorps-isbc-ceo-kevin-cummings-on-q1-2018-results-earnings-call-transcript 1/18 12/4/21, 6:26 PM Investors Bancorp's (ISBC) CEO Kevin Cummings on Q1 2018 Results - Earnings Call Transcript _ Seeking Alpha Brody Preston - Piper Jaffray Lauri…	0
420	29.pdf	Travis Perkins PLC (OTCPK:TVPKF) Q1 2018 Earnings Conference Call April 27, 2018 3:00 AM ET	Robert Eason - Goodbody Stockbrokers Paul Checketts - Barclays Bank John Messenger - Redburn Gregor Kuglitsch - UBS Investment Bank Howard Seymour - Numis Securities Ami Galla Citigroup https://seekingalpha.com/article/4167357-travis-perkins-tvpkf-ceo-john-carter-on-q1-2018-results-earnings-call-transcript 1/20 12/4/21, 6:27 PM Travis Perkins' (TVPKF) CEO John Carter on Q1 2018 Results - Earnings…	0
421	3.pdf	Horizon Pharma Plc (NASDAQ:HZNP) Q4 2017 Earnings Call February 28, 2018 8:00 AM ET	Timothy P. Walbert - Horizon Pharma Plc Paul W. Hoelscher - Horizon Pharma Plc Shao-Lee Lin - Horizon Pharma Plc Vikram Karnani - Horizon Pharma Plc Robert F. Carey - Horizon Pharma Plc Eric Mosbrooker - Horizon Pharma Plc https://seekingalpha.com/article/4151715-horizon-pharma-plc-hznp-q4-2017-results-earnings-call-transcript 1/26 12/4/21, 6:15 PM Analysts Horizon Pharma Plc (HZNP) Q4 2017 Resul…	0
422	30.pdf	UPM-Kymmene Corp. (OTCPK:UPMKF) Q1 2018 Earnings Conference Call April 26, 2018 6:15 AM ET	Lars Kjellberg - Crédit Suisse Robin Santavirta - Carnegie Linus Larsson - SEB Harri Taittonen - Nordea Jussi Pesonen Ladies and gentlemen it's time Welcome to you UPM's quarter one 2018 result https://seekingalpha.com/article/4167356-upm-kymmenes-upmkf-ceo-jussi-pesonen-on-q1-2018-results-earnings-call-transcript 1/21 12/4/21, 6:27 PM UPM-Kymmene's (UPMKF) CEO Jussi Pesonen on Q1 2018 Results - …	0
423	31.pdf	GRUMA SAB DE CV ADR (OTC:GMKYY) Q1 2018 Earnings Conference Call April 26, 2018 11:30 AM ET	Luis Miranda - Santander Alex Robarts - Citi Group Miguel Angel Tortolero - GBM Alvaro Garcia - BTG Operator https://seekingalpha.com/article/4167355-grumas-gmkyy-ceo-tom-wiley-on-q1-2018-results-earnings-call-transcript 1/16 12/4/21, 6:27 PM GRUMA's (GMKYY) CEO Tom Wiley on Q1 2018 Results - Earnings Call Transcript _ Seeking Alpha Good morning ladies and gentlemen, thank you for standing by. We…	0
424	32.pdf	Speedway Motorsports, Inc. (NYSE:TRK) Q1 2018 Earnings Conference Call April 26, 2018 10:00 AM ET	Good morning, and welcome to the Speedway Motors' First Quarter 2018 Earnings Conference Call. [Operator Instructions] As a reminder, this call is being recorded on Thursday, April 26, 2018. With us on this morning's call are Marcus Smith, Chief Executive Officer and President, and Bill Brooks, Vice Chairman and Chief Financial Officer. After their formal remarks, a question-and-answer period wil…	0
425	33.pdf	Gemalto NV (OTCPK:GTOFF) Q1 2018 Earnings Conference Call April 27, 2018 9:00 AM ET	Philippe Vallée Good afternoon and welcome to our 2018 First Quarter Revenue Call. I'm Philippe Vallée the CEO of Gemalto. And today, I'm with Virginie Dupérat-Vergne, our CFO; and Jean-Claude Deturche, our Investor Relations Officer. Together, we will commenting the presentation that you can download from our website. We will begin the key elements of the release, and then we will take your ques…	0
426	34.pdf	Briggs & Stratton Corporation (BGG) Q3 2018 Earnings Conference Call April 26, 2018 10:00 AM ET	Joe Mondillo - Sidoti & Company Operator Good morning. My name is Chino and I will be your conference operator today. At this time, I would like to welcome everyone to the Analyst Earnings Conference Call. [Operator Instructions] Thank you. Mr. Mark, you may begin your conference. Mark Schwertfeger https://seekingalpha.com/article/4167322-briggs-and-strattons-bgg-ceo-todd-teske-on-q3-2018-results…	1
427	35.pdf	Gas Natural SDG SA. (OTCPK:GASNY) Q1 2018 Results Earnings Conference Call April 26, 2018 4:00 AM ET	for the First Quarter of 2018. From now on, we will be presenting in English. The results will be presented by our Executive Chairman, Mr. Francisco Reynes together with our CFO, Mr. Carlos Alvarez. At the end of the presentation, we open it up for Q&A as always. We kindly remind participants to submit their questions through the webcast and during the course of the presentation, after which the …	0
428	36.pdf	Assa Abloy AB (OTCPK:ASAZY) Q1 2018 Earnings Conference Call April 26, 2018 4:00 AM ET	Lars Brorson - Barclays Bank PLC Andreas Willi - JPMorgan. Andreas Andre Kukhnin - Credit Suisse Markus Almerud - Kepler Cheuvreux Jeffrey Kessler - Imperial Capital Guillermo Peigneux UBS https://seekingalpha.com/article/4167302-assa-abloys-asazy-ceo-nico-delvaux-on-q1-2018-results-earnings-call-transcript 1/25 12/4/21, 6:29 PM ASSA ABLOY's (ASAZY) CEO Nico Delvaux on Q1 2018 Results - Earnings …	0
429	37.pdf	Air Liquide SA (OTCPK:AIQUF) Q1 2018 Earnings Conference Call April 25, 2018 4:30 Guy Salzgeber - Executive Vice-President, Europe Industries Hub	Theodora Joseph - Goldman Sachs Group Paul Walsh - Morgan Stanley Thomas Wrigglesworth - Citigroup Martin Roediger - Kepler Cheuvreux Patrick Lambert - Raymond James Andrew Stott - UBS Investment Bank Laurence Alexander Jefferies https://seekingalpha.com/article/4167300-air-liquides-aiquf-on-q1-2018-results-earnings-call-transcript 1/26 12/4/21, 6:29 PM Air Liquide's (AIQUF) on Q1 2018 Results - …	0
430	38.pdf	AtriCure, Inc. (NASDAQ:ATRC) Q1 2018 Results Earnings Conference Call April 26, 2018 4:30 PM ET	Andrew Wade - Senior Vice President and Chief Financial Officer Analysts Matthew O'Brien - Piper Jaffray Companies, Research Division Jason Mills - Canaccord Genuity Limited https://seekingalpha.com/article/4167298-atricures-atrc-ceo-mike-carrel-on-q1-2018-results-earnings-call-transcript 1/21 12/4/21, 6:29 PM Jaso s Ca acco d Ge u ty ted AtriCure's (ATRC) CEO Mike Carrel on Q1 2018 Results - Ear…	0
431	39.pdf	Saipem S.p.A. ADR (OTCPK:SAPMY) Q1 2018 Earnings Conference Call April 24, 2018 3:00 AM ET	Alessandro Pozzi - Mediobanca Amy Wong - UBS Mick Pickup - Barclays PLC David Farrell - Macquarie Group Mark Wilson - Jefferies LLC https://seekingalpha.com/article/4167297-saipems-sapmy-ceo-stefano-cao-on-q1-2018-results-earnings-call-transcript 1/27 12/4/21, 6:29 PM Saipem's (SAPMY) CEO Stefano Cao on Q1 2018 Results - Earnings Call Transcript _ Seeking Alpha Michael Rae - Redburn Partners LLP …	0
432	4.pdf	BW LPG Limited (OTCPK:BWLLF) Q4 2017 Results Earnings Conference Call February 28, 2018 4:00 AM ET	Operator Welcome to BW LPG’s Fourth Quarter 2017 Financial Results Presentation. We will begin shortly. You will be brought through the presentation by Martin Ackermann, CEO; and Elaine Ong, CFO of BW LPG. They will be pleased to address any questions after the presentation. [Operator Instructions] We will begin the presentation now. Martin Ackermann https://seekingalpha.com/article/4155716-bw-lp…	0
433	40.pdf	Odontoprev SA ADR (OTCPK:ODPVY) Q1 2018 Earnings Conference Call April 26, 2017 9:00 AM ET	Ricardo Rezende - HSBC Adeodato Volpi Netto - Eleven Financial Tobias Stingelin - Crédit Suisse Operator https://seekingalpha.com/article/4167296-odontoprevs-odpvy-ceo-rodrigo-bacellar-on-q1-2018-results-earnings-call-transcript 1/17 12/4/21, 6:30 PM Odontoprev's (ODPVY) CEO Rodrigo Bacellar on Q1 2018 Results - Earnings Call Transcript _ Seeking Alpha Good morning, ladies and gentlemen, and than…	0
434	41.pdf	Constellation Brands, Inc (NYSE:STZ) Q1 2019 Earnings Conference Call June 29, 2018 10:30 AM ET	David Klein - Chief Financial Officer Analysts Bonnie Herzog - Wells Fargo Dara Mohsenian - Morgan Stanley https://seekingalpha.com/article/4184830-constellation-brands-inc-stz-ceo-rob-sands-on-q1-2019-results-earnings-call-transcript 1/29 12/4/21, 6:31 PM a a o se a o ga Sta ey Constellation Brands, Inc (STZ) CEO Rob Sands on Q1 2019 Results - Earnings Call Transcript _ Seeking Alpha Caroline Le…	0
435	42.pdf	Greenbrier Companies Inc. (NYSE:GBX) Q3 2018 Earnings Conference Call June 29, 2018 11:00 AM ET	Bill Furman - Chairman and Chief Executive Officer Lorie Tekorius - Executive Vice President and Chief Financial Officer Analysts Matt Elkott - Cowen and Company Justin Long - Stephens https://seekingalpha.com/article/4184824-greenbrier-companies-inc-gbx-ceo-bill-furman-on-q3-2018-results-earnings-call-transcript 1/24 12/4/21, 6:31 PM Just o g Step e s Greenbrier Companies Inc. (GBX) CEO Bill Fur…	0
436	43.pdf	Akebia Therapeutics, Inc. (NASDAQ:AKBA) Merger & Acquisition Call June 28, 2018 8:00 AM ET	Biopharmaceuticals Analysts Maurice Choy - RBC Capital Markets Bin Lu - Raymond James Bert Hazlett - BTIG Yigal Nochomovitz - Citi Group https://seekingalpha.com/article/4184647-akebia-therapeutics-inc-akba-merger-and-acquisition-call-transcript 1/26 12/4/21, 6:31 PM Akebia Therapeutics, Inc. (AKBA) Merger & Acquisition Call - Transcript _ Seeking Alpha Alex Bouilloux - Mizuho Securities Jason Ko…	0
437	44.pdf	NIKE, Inc. (NYSE:NKE) Q4 2018 Results Earnings Conference Call June 28, 2018 5:00 PM ET	Andy Campion - CFO Analysts Bob Drbul - Guggenheim Kate McShane - Citi Jamie Merriman - Bernstein https://seekingalpha.com/article/4184644-nike-inc-nke-ceo-mark-parker-on-q4-2018-results-earnings-call-transcript 1/27 12/4/21, 6:32 PM NIKE, Inc. (NKE) CEO Mark Parker on Q4 2018 Results - Earnings Call Transcript _ Seeking Alpha Jim Duffy - Stifel Simeon Siegel - Nomura Instinet Chris Svezia - Wedb…	0
438	45.pdf	SYNNEX Corporation (NYSE:SNX) Q2 2018 Earnings Conference Call June 28, 2018 5:00 PM ET	Marshall Witt - CFO Analysts Adam Tindle - Raymond James Christopher Caldwell - EVP & President of Concentrix Corporation https://seekingalpha.com/article/4184642-synnex-corporation-snx-ceo-dennis-polk-on-q2-2018-results-earnings-call-transcript 1/26 12/4/21, 6:32 PM da d e ay o d Ja es SYNNEX Corporation (SNX) CEO Dennis Polk on Q2 2018 Results - Earnings Call Transcript _ Seeking Alpha Matt She…	0
439	46.pdf	KB Home (NYSE:KBH) Q2 2018 Results Conference Call June 28, 2018 5:00 PM ET	Jeff Kaminski - EVP and CFO Matt Mandino - EVP and COO Bill Hollinger - SVP and CAO Thad Johnson - SVP and Treasurer https://seekingalpha.com/article/4184641-kb-homes-kbh-ceo-jeffrey-mezger-on-q2-2018-results-earnings-call-transcript 1/28 12/4/21, 6:32 PM KB Home's (KBH) CEO Jeffrey Mezger on Q2 2018 Results - Earnings Call Transcript _ Seeking Alpha Analysts Alan Ratner - Zelman & Associates Ste…	0
440	47.pdf	TechPrecision Corp. (OTCQB:TPCS) Q4 2018 Earnings Conference Call June 28, 2018 4:30 PM ET	Ross Taylor - ARS Investment Partners, LLC Sameer Gulati - Gulati Consulting Greetings and welcome to the TechPrecision Fourth Quarter and Year-End 2018 Earnings Call. At this time, all participants are in a listen-only mode. A question-and- answer session will follow the formal presentation. [Operator Instructions] As a reminder this conference is being recorded. I would now like to turn the con…	0
441	48.pdf	Empire Company Ltd. (OTCPK:EMLAF) Q4 2018 Earnings Conference Call June 28, 2018 12:00 PM ET	Irene Nattel - RBC Capital Markets Jim Durran - Barclays Capital Vishal Shreedhar - National Bank Mark Petrie - CIBC Capital Markets Chris Li - Macquarie Peter Sklar BMO Capital Markets https://seekingalpha.com/article/4184634-empire-company-ltd-emlaf-ceo-michael-medline-on-q4-2018-results-earnings-call-transcript 1/28 12/4/21, 6:33 PM Empire Company Ltd. (EMLAF) CEO Michael Medline on Q4 2018 Re…	0
442	49.pdf	McCormick & Company, Inc. (NYSE:MKC) Q2 2018 Earnings Conference Call June 28, 2018 8:00 AM ET	Lawrence Kurzius - Chairman, President, Chief Executive Officer Mike Smith - Executive Vice President, Chief Financial Officer Analysts Robert Moskow - Credit Suisse Ken Goldman - JPMorgan https://seekingalpha.com/article/4184627-mccormick-and-company-inc-mkc-ceo-lawrence-kurzius-on-q2-2018-results-earnings-call 1/39 12/4/21, 6:33 PM McCormick & Company, Inc. (MKC) CEO Lawrence Kurzius on Q2 2018…	1
443	5.pdf	Jardine Lloyd Thompson Group plc (OTCPK:LLTHF) Q4 2017 Results Earnings Conference Call February 28, 2018 4:00 AM ET	Eamonn Flanagan - Shore Capital William Hawkins - KBW Joanna Parsons - Stockdale Dominic Burke Okay. Well, thank you all for making the effort to get here this morning in the difficulties. It is much appreciated that you all made the effort. So, let start by wishing you a good morning and welcome to everybody to our 2017 Preliminary Results presentation. https://seekingalpha.com/article/4156130-j…	1
444	50.pdf	OMNOVA Solutions Inc. (NYSE:OMN) Q2 2018 Earnings Conference Call June 28, 2018 11:00 AM ET	Daniel Rizzo - Jefferies & Company Jon Tanwanteng - CJS Securities Operator Ladies and gentlemen, thank you for standing by and welcome to the OMNOVA Solutions’ Second Quarter 2018 Earnings Discussion. At this time, all participants are in listen-only mode. Later, we will conduct a question-and-answer session and instructions will be given at that time [Operator Instructions] As a reminder today’…	0
445	51.pdf	Shaw Communications Inc. (NYSE:SJR) Q3 2018 Results Earnings Conference Call June 28, 2018 10:00 AM ET Executives	Jay Mehr - President Analysts Vince Valentini - TD Securities Jeff Fan - Scotia Bank https://seekingalpha.com/article/4184617-shaw-communications-inc-s-sjr-ceo-bradley-shaw-on-q3-2018-results-earnings-call-transcript 1/25 12/4/21, 6:34 PM Shaw Communications Inc.'s (SJR) CEO Bradley Shaw on Q3 2018 Results - Earnings Call Transcript _ Seeking Alpha Jeff Fan Scotia Bank Phillip Huang - Barclays In…	0
446	52.pdf	Worthington Industries, Inc. (NYSE:WOR) Q4 2018 Earnings Conference Call June 28, 2018 10:30 AM ET	Mark Russell - President and Chief Operating Officer Andy Rose - Executive Vice President and Chief Financial Officer Analysts Martin Engler - Jefferies https://seekingalpha.com/article/4184605-worthington-industries-inc-wor-ceo-john-mcconnell-on-q4-2018-results-earnings-call-transcript 1/15 12/4/21, 6:34 PM Worthington Industries, Inc. (WOR) CEO John McConnell on Q4 2018 Results - Earnings Call …	0
447	53.pdf	H.B. Fuller Company (NYSE:FUL) Q2 2018 Earnings Conference Call June 28, 2018 10:30 AM ET	John Corkrean - EVP and CFO Maximillian Marcy - Director, IR and International Finance Analysts Katherine Griffin - Deutsche Bank Dmitry Silversteyn - Longbow Research https://seekingalpha.com/article/4184604-h-b-fuller-company-ful-ceo-jim-owens-on-q2-2018-results-earnings-call-transcript 1/26 12/4/21, 6:34 PM H.B. Fuller Company (FUL) CEO Jim Owens on Q2 2018 Results - Earnings Call Transcript _…	0
448	54.pdf	Walgreens Boots Alliance, Inc. Q3 2018 Earnings Conference Call June 28, 2018 8:30 AM ET	James Kehoe - Executive Vice President and Global Chief Financial Officer AM ET Executives Analysts Lisa Gill - JPMorgan https://seekingalpha.com/article/4184600-walgreens-boots-alliance-inc-wba-ceo-stefano-pessina-on-q3-2018-results-earnings-call 1/27 12/4/21, 6:35 PM Walgreens Boots Alliance, Inc. (WBA) CEO Stefano Pessina on Q3 2018 Results - Earnings Call Transcript _ Seeking Alpha Ricky Gold…	0
449	55.pdf	Gypsum Management and Supply, Inc. (NYSE:GMS) Q4 2018 Earnings Conference Call June 28, 2018 10:00 AM ET	Michael Callahan - President, CEO & Director Howard Goforth - VP, CFO & Treasurer Analysts Keith Hughes - SunTrust Robinson Humphrey Michael Dahl - RBC Capital Markets https://seekingalpha.com/article/4184597-gypsum-management-and-supplys-gms-ceo-michael-callahan-on-q4-2018-results-earnings-call 1/27 12/4/21, 6:35 PM Gypsum Management and Supply's (GMS) CEO Michael Callahan on Q4 2018 Results - E…	0
450	56.pdf	H & M Hennes & Mauritz AB (OTCPK:HNNMY) Q2 2018 Results Earnings Conference Call June 28, 2018 8:00 AM ET	Magnus Raman - Handelsbanken Charlie Muir-Sands - Deutsche Bank Rebecca McClellan - Santander Adam Cochrane - Citi Cedric Lecasble - Raymond James Michelle Wilson Berenberg https://seekingalpha.com/article/4184596-h-and-m-hennes-and-mauritz-ab-hnnmy-ceo-karl-johan-persson-on-q2-2018-results-earnings-call 1/27 12/4/21, 6:35 PM H & M Hennes & Mauritz AB (HNNMY) CEO Karl-Johan Persson on Q2 2018 Res…	0
451	57.pdf	NovaGold Resources, Inc. (NYSE:NG) Q2 2018 Results Conference Call June 28, 2018 11:00 AM ET	John Bridges - JP Morgan Stephen Walker - RBC Capital Markets Operator Good day, ladies and gentlemen, and welcome to the NOVAGOLD Second Quarter 2018 Conference Call. At this time, all participants are in a listen-only mode. Later, we will conduct a question-and-answer session and instructions will follow at that time. [Operator Instructions] https://seekingalpha.com/article/4184594-novagold-res…	0
452	58.pdf	Investors Real Estate Trust (IRET) Q4 2018 Earnings Conference Call June 28, 2018 10:00 AM ET	Drew Babin - Robert W. Baird Operator Good morning and welcome to the IRET Fourth Quarter 2018 Earnings Conference Call and Webcast. All participants will be in listen-only mode. [Operator Instructions] After today's presentation, there will be an opportunity to ask questions. [Operator Instructions] Please note this event is being recorded. I would now like to turn the conference over to Mark De…	1
453	59.pdf	Accenture plc (NYSE:ACN) Q3 2018 Earnings Conference Call June 28, 2018 8:00 AM ET	David Rowland - Chief Financial Officer Analysts Jason Kupferberg - Bank of America Merrill Lynch Tien-tsin Huang - JPMorgan https://seekingalpha.com/article/4184587-accenture-plc-acn-ceo-pierre-nanterme-on-q3-2018-results-earnings-call-transcript 1/31 12/4/21, 6:36 PM Accenture plc (ACN) CEO Pierre Nanterme on Q3 2018 Results - Earnings Call Transcript _ Seeking Alpha Bryan Bergin - Cowen & Co. …	1
454	6.pdf	DAQO New Energy (NYSE:DQ) Q4 2017 Earnings Conference Call February 28, 2018 8:00 AM ET	Ming Yang - CFO Analysts Philip Shen - Roth Capital Partners Gordon Johnson - Vertical Group https://seekingalpha.com/article/4151684-daqo-new-energys-dq-ceo-longgen-zhang-on-q4-2017-results-earnings-call-transcript 1/21 12/4/21, 6:16 PM DAQO New Energy's (DQ) CEO Longgen Zhang on Q4 2017 Results - Earnings Call Transcript _ Seeking Alpha Operator Good day and welcome to the Daqo New Energy Fourt…	0
455	60.pdf	Apogee Enterprises, Inc. (APOG) CEO Joe Puishys on Q1 2019 Results - Earnings Call Transcript	Jim Porter - Chief Financial Officer Analysts Chris Moore - CJS Securities Brent Thielman - D.A. Davidson Eric Stine - Craig-Hallum Jon Braatz - Kansas City Capital Bill Dezellem - Tieton Capital Management Operator Good day ladies and gentlemen, and welcome to the Apogee Enterprises Fiscal 2019 First Quarter Earnings Conference Call. At this time all participants are in a listen-only mode. Later…	1
456	61.pdf	SAS AB (OTC:SASDF) Q3 2018 Earnings Conference Call August 31, 2018 4:00 AM ET	Achal Kumar - HSBC Andrew Lobbenberg - HSBC Rickard Gustafson https://seekingalpha.com/article/4205034-sas-ab-sasdf-ceo-rickard-gustafson-on-q3-2018-results-earnings-call-transcript 1/27 12/4/21, 6:38 PM SAS AB (SASDF) CEO Rickard Gustafson on Q3 2018 Results - Earnings Call Transcript _ Seeking Alpha Thank you very much operator, and good morning and welcome, ladies and gentlemen. Welcome to SAS…	0
457	62.pdf	Ambarella Inc. (NASDAQ:AMBA) Q2 2019 Earnings Conference Call August 30, 2018 4:30 PM ET	Kevin Eichler - Chief Financial Officer George Laplante - Executive Vice President Analysts Kevin Cassidy - Stifel https://seekingalpha.com/article/4203395-ambarella-inc-amba-ceo-fermi-wang-on-q2-2019-results-earnings-call-transcript 1/30 12/4/21, 6:38 PM Ambarella Inc. (AMBA) CEO Fermi Wang on Q2 2019 Results - Earnings Call Transcript _ Seeking Alpha Joe Moore - Morgan Stanley Ross Seymore - De…	0
458	63.pdf	Ulta Beauty, Inc. (NASDAQ:ULTA) Q2 2018 Earnings Conference Call August 30, 2018 5:00 PM ET	Scott Settersten - Chief Financial Officer, Treasurer and Assistant Secretary David Kimbell - Chief Merchandising and Marketing Officer Analysts Brian Tunick - RBC Capital Markets https://seekingalpha.com/article/4203333-ulta-beauty-inc-ulta-ceo-mary-dillon-on-q2-2018-results-earnings-call-transcript 1/35 12/4/21, 6:38 PM Ulta Beauty, Inc. (ULTA) CEO Mary Dillon on Q2 2018 Results - Earnings Call…	1
459	64.pdf	Pinduoduo Inc. (NASDAQ:PDD) Q2 2018 Earnings Conference Call August 30, 2018 9:00 PM ET	Piyush Mubayi - Goldman Sachs Wendy Huang - Macquarie Operator Ladies and gentlemen, thank you for standing by and welcome to the Pinduoduo Second Quarter 2018 Earnings Conference Call. At this time, all participants are in a listen-only mode. There will be a presentation followed by a question-and-answer session [Operator Instructions] I must advise you that this confidence being recorded https:…	1
460	65.pdf	Zuora, Inc. (NYSE:ZUO) Q2 2019 Earnings Conference Call August 30, 2018 5:00 PM ET	Richard Davis - Canaccord John DiFucci - Jefferies Stan Zlotsky - Morgan Stanley Operator Good afternoon. My name is Jay and I will be your conference operator today. At this time, I would like to welcome everyone to the Zuora Fiscal Q2 2019 Earnings Call. All lines have been placed on mute to prevent any background noise. After the speakers’ remarks there will be a question-and-answer session [O…	1
461	66.pdf	Yext, Inc. (NYSE:YEXT) Q2 2019 Earnings Conference Call August 30, 2018 5:00 PM ET	Jim Steele - President and Chief Revenue Officer Steve Cakebread - Chief Financial Officer Analysts Zachary Schwartzman - RBC Capital Markets https://seekingalpha.com/article/4203321-yext-inc-yext-ceo-howard-lerman-on-q2-2019-results-earnings-call-transcript 1/25 12/4/21, 6:39 PM Yext, Inc. (YEXT) CEO Howard Lerman on Q2 2019 Results - Earnings Call Transcript _ Seeking Alpha Alex Zukin - Piper J…	0
462	67.pdf	Nutanix, Inc. (NASDAQ:NTNX) Q4 2018 Results Earnings Conference Call August 30, 2018 4:30 PM ET	Dheeraj Pandey - Founder, CEO, and Chairman Duston Williams - CFO Analysts Andrew Nowinski - Piper Jaffray Matt Hedberg - RBC Capital Markets https://seekingalpha.com/article/4203320-nutanix-inc-s-ntnx-ceo-dheeraj-pandey-on-q4-2018-results-earnings-call-transcript 1/32 12/4/21, 6:39 PM Nutanix, Inc.'s (NTNX) CEO Dheeraj Pandey on Q4 2018 Results - Earnings Call Transcript _ Seeking Alpha Rod Hall…	0
463	68.pdf	MEI Pharma, Inc. (NASDAQ:MEIP) Q4 2018 Earnings Conference Call August 30, 2018 5:00 PM ET	Daniel Gold - President, CEO & Director David Urso - COO, SVP, Corporate Development & General Counsel Richard Ghalie – SVP, Clinical Development Analysts https://seekingalpha.com/article/4203318-mei-pharma-inc-meip-ceo-daniel-gold-on-q4-2018-results-earnings-call-transcript 1/17 12/4/21, 6:40 PM MEI Pharma, Inc. (MEIP) CEO Daniel Gold on Q4 2018 Results - Earnings Call Transcript _ Seeking Alpha…	0
464	69.pdf	The Cooper Companies Inc. (NYSE:COO) Q3 2018 Earnings Conference Call August 30, 2018 5:00 PM ET	Brian Andrews - Senior Vice President, Chief Financial Officer and Treasurer Analysts Jeff Johnson - Robert W. Baird & Co. Larry Biegelsen - Wells Fargo Securities https://seekingalpha.com/article/4203316-cooper-companies-inc-coo-ceo-albert-white-on-q3-2018-results-earnings-call-transcript 1/36 12/4/21, 6:40 PM The Cooper Companies Inc. (COO) CEO Albert White on Q3 2018 Results - Earnings Call Tr…	0
465	7.pdf	Capitala Finance's (CPTA) CEO Joe Alala on Q4 2017 Results - Earnings Call Transcript	Executives Joe Alala - Chairman and CEO Jack McGlinn - COO, Treasurer and Secretary Steve Arnall - CFO Analysts https://seekingalpha.com/article/4151669-capitala-finances-cpta-ceo-joe-alala-on-q4-2017-results-earnings-call-transcript 1/9 12/4/21, 6:16 PM Capitala Finance's (CPTA) CEO Joe Alala on Q4 2017 Results - Earnings Call Transcript _ Seeking Alpha Christopher Nolan - Ladenburg Thalmann Chr…	1
466	70.pdf	Sunniva Inc. (OTCPK:SNNVF) Q2 2018 Earnings Conference Call August 30, 2018 11:00 AM ET	Operator Matt Bottomley - Canaccord Genuity Anthony de Ruijter - Fundamental Research Corp Thank you for standing by. This is the conference operator. Welcome to the Sunniva Inc. Second Quarter 2018 Earnings Conference Call. As a reminder, all participants are in listen-only mode and the conference is being recorded. After the presentation, there will be an opportunity for analysts to ask questio…	1
467	71.pdf	American Outdoor Brands Corporation (AOBC) Q1 2019 Earnings Conference Call August 30, 2018 5:00 PM ET	Jeff Buchanan - Chief Financial Officer Analysts James Hardiman - Wedbush Securities Cai von Rumohr - Cowen & Company https://seekingalpha.com/article/4203310-american-outdoor-brands-corporation-aobc-ceo-james-debney-on-q1-2019-results-earnings-call 1/23 12/4/21, 6:41 PM American Outdoor Brands Corporation (AOBC) CEO James Debney on Q1 2019 Results - Earnings Call Transcript _ Seeking Alpha Scott…	0
468	72.pdf	Lululemon Athletica Inc. (NASDAQ:LULU) Q2 2018 Results Earnings Conference Call August 30, 2018 4:30 PM ET	Calvin McDonald - CEO Stuart Haselden - COO PJ Guido - CFO Celeste Burgoyne - EVP, Americas https://seekingalpha.com/article/4203306-lululemon-athletica-inc-lulu-ceo-calvin-mcdonald-on-q2-2018-results-earnings-call-transcript 1/28 12/4/21, 6:41 PM Lululemon Athletica Inc. (LULU) CEO Calvin McDonald on Q2 2018 Results - Earnings Call Transcript _ Seeking Alpha Analysts Kimberly Greenberger - Morga…	1
469	73.pdf	The Toronto-Dominion Bank (NYSE:TD) Q3 2018 Earnings Conference Call August 30, 2018 1:30 PM ET	Riaz Ahmed - CFO Ajai Bambawale - Chief Risk Officer Theresa Currie - Group Head, Canadian Personal Banking Bob Dorrance - Group Head, Wholesale Banking. https://seekingalpha.com/article/4203303-toronto-dominion-bank-td-ceo-bharat-masrani-on-q3-2018-results-earnings-call-transcript 1/29 12/4/21, 6:41 PM The Toronto-Dominion Bank (TD) CEO Bharat Masrani on Q3 2018 Results - Earnings Call Transcrip…	1
470	74.pdf	Elekta AB ADR (OTCPK:EKTAY) Q1 2019 Earnings Conference Call August 30, 2018 4:00 AM ET	Alex Gibson - Morgan Stanley Johan Unnerus - Pareto Securities Sten Gustafsson - ABG Romain Zana - BNP Paribas Veronika Dubajova - Goldman Sachs Kit Lee Jefferies https://seekingalpha.com/article/4203301-elekta-ab-ektay-ceo-richard-hausmann-on-q1-2019-results-earnings-call-transcript 1/29 12/4/21, 6:41 PM Elekta AB (EKTAY) CEO Richard Hausmann on Q1 2019 Results - Earnings Call Transcript _ Seeki…	0
471	75.pdf	Galaxy Resources Limited (OTCPK:GALXF) Q2 2018 Earnings Conference Call August 29, 2018 8:00 PM ET	Nick Herbert - Credit Suisse Warren Edney - Baillieu Rahul Anand - Morgan Stanley Alex Wallis - Maven Investment Partners Glyn Lawcock - UBS Larry Hill Canaccord https://seekingalpha.com/article/4203300-galaxy-resources-limited-galxf-ceo-anthony-tse-on-q2-2018-results-earnings-call-transcript 1/25 12/4/21, 6:42 PM Galaxy Resources Limited (GALXF) CEO Anthony Tse on Q2 2018 Results - Earnings Call…	0
472	76.pdf	Hooker Furniture Corporation (NASDAQ:HOFT) Q2 2019 Earnings Conference Call August 30, 2018 2:00 PM ET	Michael Delgatti - President Hooker Domestic Upholstery and Emerging Channel; Doug Townsend - Co-President, HMI Analysts Anthony Lebiedzinski - Sidoti https://seekingalpha.com/article/4203297-hooker-furniture-corporation-hoft-ceo-paul-toms-on-q2-2019-results-earnings-call-transcript 1/15 12/4/21, 6:42 PM Hooker Furniture Corporation (HOFT) CEO Paul Toms on Q2 2019 Results - Earnings Call Transcri…	0
473	77.pdf	A10 Networks, Inc. (NYSE:ATEN) Q2 2018 Results Earnings Conference Call August 30, 2018 4:30 PM ET	30, 2018 4:30 PM ET Executives Maria Riley - Investor Relations Chris White - EVP Worldwide Sales Analysts Mark Kelleher - DA Davidson & Co. https://seekingalpha.com/article/4203293-a10-networks-inc-s-aten-ceo-lee-chen-on-q2-2018-results-earnings-call-transcript 1/16 12/4/21, 6:42 PM A10 Networks Inc.'s (ATEN) CEO Lee Chen on Q2 2018 Results - Earnings Call Transcript _ Seeking Alpha Catharine Tr…	0
474	78.pdf	Par Pacific Holdings, Inc. (NYSE:PARR) IES Acquisition Conference Call August 30, 2018 9:00 AM ET	Matthew Blair - Tudor, Pickering, Holt Mike Harrison - Seaport Global Securities Jason Gabelman - Cowen and Company Andrew Shapiro - Lawndale Capital Management Operator https://seekingalpha.com/article/4203288-par-pacific-holdings-inc-parr-ceo-william-pate-on-ies-acquisition-conference-transcript 1/14 12/4/21, 6:43 PM Par Pacific Holdings, Inc. (PARR) CEO William Pate on IES Acquisition Conferen…	1
475	79.pdf	Culp, Inc. (NYSE:CULP) Q1 2019 Earnings Conference Call August 30, 2018 11:00 AM ET	Frank Saxon - President and Chief Executive Officer Ken Bowling - Chief Financial Officer Iv Culp - Division President, Mattress Fabrics Analysts Bobby Griffin - Raymond James https://seekingalpha.com/article/4203283-culp-inc-culp-ceo-frank-saxon-on-q1-2019-results-earnings-call-transcript 1/19 12/4/21, 6:43 PM Culp, Inc. (CULP) CEO Frank Saxon on Q1 2019 Results - Earnings Call Transcript _ Seek…	1
476	8.pdf	PNM Resources, Inc. (NYSE:PNM) Q4 2017 Earnings Conference Call February 27, 2018 11:00 AM ET	Nicholas Campanella - Bank of America Merrill Lynch Ali Agha - SunTrust Greg Gordon - Evercore ISI Lasan Johong - Auvila Research Consulting Paul Fremont - Mizuho Securities USA Insoo Kim RBC Capital Markets https://seekingalpha.com/article/4151660-pnm-resources-pnm-ceo-pat-vincent-collawn-on-q4-2017-results-earnings-call-transcript 1/25 12/4/21, 6:17 PM PNM Resources' (PNM) CEO Pat Vincent-Colla…	0
477	80.pdf	Dollar General Corporation (NYSE:DG) Q2 2018 Results Earnings Conference Call Jennifer Beugelmans - VP, IR and Public Relations	John Garratt - CFO Analysts Matthew Boss - JP Morgan Vincent Sinisi - Morgan Stanley https://seekingalpha.com/article/4203273-dollar-general-corporation-dg-ceo-todd-vasos-on-q2-2018-results-earnings-call-transcript 1/27 12/4/21, 6:43 PM Dollar General Corporation (DG) CEO Todd Vasos on Q2 2018 Results - Earnings Call Transcript _ Seeking Alpha Paul Trussell - Deutsche Bank Scot Ciccarelli - RBC C…	0
478	81.pdf	Bridgeline Digital, Inc. (NASDAQ:BLIN) Q4 2018 Results Earnings Conference Call December 28, 2018 4:30 PM ET	Roger Kahn - President, CEO & Director Carole Tyner - CFO & Treasurer Analysts Operator Good day, ladies and gentlemen, and welcome to the Bridgeline Digital, Inc.'s Fourth Quarter 2018 and Year-End Earnings Call. [Operator Instructions] As a reminder, today's conference is being recorded. With us on today's call are Ms. Carole Tyner, Chief ti Offi https://seekingalpha.com/article/4230610-bridgel…	0
479	82.pdf	ADDvantage Technologies Group, Inc. (NASDAQ:AEY) Q4 2018 Earnings Conference Call December 28, 2018 12:00 PM ET	Analysts Operator Michael Hess - Hess Investments Sam Rebotsky - SER Asset Management Good day, and welcome to the ADDvantage Technologies’ Fiscal Year 2018 Earnings Conference Call Today’s conference is being recorded https://seekingalpha.com/article/4230598-addvantage-technologies-group-inc-aey-ceo-joseph-hart-on-q4-2018-results-earnings-call 1/25 12/4/21, 6:45 PM ADDvantage Technologies Group,…	1
480	83.pdf	Live Ventures (NASDAQ:LIVE) Q4 2018 Earnings Conference Call December 27, 2018 4:30 PM ET	Jon Isaac - President and Chief Executive Officer Rodney Spriggs - Chief Executive Officer, Vintage Stock, Inc. Good day, everyone, and welcome to today’s 2018 Fiscal Year-End Call. At this time, all participants are in a listen-only mode. And later, you will have the opportunity to ask questions during the question-and-answer session. [Operator Instructions] Please note that today’s call is bein…	1
481	84.pdf	CSP Inc. (NASDAQ:CSPI) Q4 2018 Earnings Conference Call December 27, 2018 10:00 AM ET	Technology Solutions, North America Joseph Nerges - Segren Investments Good day, ladies and gentlemen, and welcome to CSPI’s Fourth Quarter Fiscal 2018 Conference Call. My name is Chris, and I’ll be your coordinator for today. At this time, all participants are in a listen-only mode. We will conduct a question-and-answer session towards the end of this conference call. I would now like to turn th…	1
482	85.pdf	Internap Network Services Corporation (NASDAQ:INAP) INAP Provides 2019 Outlook with Enhanced Data Center Portfolio December 19, 2018 5:00 PM ET	Frank Louthan - Raymond James Jon Peterson - Jefferies Operator Good day, ladies and gentlemen, and welcome to the INAP Corporate Update Conference Call. At this time, all participants are in a listen-only mode. Later, we will conduct a question-and-answer session and instructions will follow at that time. [Operator Instructions] As a reminder this conference is being recorded I would now https:/…	1
483	86.pdf	Dynasil Corporation of America (OTCPK:DYSL) Q4 2018 Earnings Conference Call December 26, 2018 5:00 PM ET	Analysts Operator Good day, and welcome to Dynasil Corporation of America’s Fiscal 2018 Conference Call. Today’s call is being recorded. At this time, all participants are in a listen-only mode. There will be an opportunity for questions at the end of the call. [Operator Instructions] https://seekingalpha.com/article/4230291-dynasil-corporation-of-america-dysl-ceo-peter-sulick-on-q4-2018-results-…	1
484	87.pdf	Lamar Advertising Company (NASDAQ:LAMR) Acquisition of Five New Markets from Fairway Outdoor & Announces 2019 Distribution Plan December 21, 2018 2:00 PM ET	Analysts Operator Excuse me, ladies and gentlemen. We now have Mr. Sean Reilly and Mr. Keith Istre in conference. Please be aware that each of your lines is in a listen-only mode. At the conclusion of the Company's presentation, we will open the floor for questions [Operator Instructions] https://seekingalpha.com/article/4229713-lamar-advertising-company-lamr-lamar-advertising-acquires-five-new-m…	0
485	88.pdf	Altria Group, Inc. (NYSE:MO) Discussion of Investment at Juul Labs Inc. Conference Call December 20, 2018 9:00 AM ET	Analysts Vivien Azer - Cowen & Company Bonnie Herzog - Wells Fargo Steve Powers - Deutsche Bank Michael Lavery - Piper Jaffray Pamela Kaufman Morgan Stanley https://seekingalpha.com/article/4229702-altria-group-inc-mo-ceo-howard-willard-on-discussion-of-investment-juul-labs-inc-conference 1/31 12/4/21, 6:46 PM Altria Group, Inc. (MO) CEO Howard Willard on Discussion of Investment at Juul Labs Inc…	0
486	89.pdf	CarMax Group (NYSE:KMX) Q3 2019 Earnings Conference Call December 21, 2018 9:00 AM ET	Tom Reedy - Executive Vice President and CFO Analysts Brian Nagel - Oppenheimer Scot Ciccarelli - RBC https://seekingalpha.com/article/4229700-carmax-group-kmx-ceo-bill-nash-on-q3-2019-results-earnings-call-transcript 1/27 12/4/21, 6:47 PM CarMax Group (KMX) CEO Bill Nash on Q3 2019 Results - Earnings Call Transcript _ Seeking Alpha Sharon Zackfia - William Blair Craig Kennison - Baird Seth Basha…	1
487	9.pdf	Admiral Group Plc. (OTCPK:AMIGF) Q4 2017 Earnings Conference Call February 28, 2018 4:00 AM ET	Greig Paterson - KBW Thomas Seidl - Bernstein Arjan Van Veen - UBS Andrew Crean - Autonomous Dom O'Mahony - Exane BNP Paribas David Bracewell Redburn https://seekingalpha.com/article/4151654-admirals-amigf-ceo-david-stevens-on-q4-2017-results-earnings-call-transcript 1/34 12/4/21, 6:17 PM Admiral's (AMIGF) CEO David Stevens on Q4 2017 Results - Earnings Call Transcript _ Seeking Alpha David Brace…	0
488	90.pdf	Greif, Inc. (NYSE:GEF) Greif Inc to Acquire Caraustar Industries Inc Conference Call December 20, 2018 9:30 AM ET	Ghansham Panjabi - Baird Mark Wilde - BMO Capital Markets Justin Bergner - Gabelli & Company Steve Chercover - Davidson Roger Spitz - Bank of America Adam Josephson KeyBanc https://seekingalpha.com/article/4229676-greif-inc-gef-greif-inc-to-acquire-caraustar-industries-inc-conference-call-transcript 1/22 12/4/21, 6:47 PM Greif, Inc. (GEF) Greif, Inc to Acquire Caraustar Industries Inc Conference …	0
489	91.pdf	Cintas Corporation (NASDAQ:CTAS) Q2 2019 Earnings Conference Call December 20, 2018 5:00 PM ET	Analysts Manav Patnaik - Barclays Toni Kaplan - Morgan Stanley Gary Bisbee - Bank of America Merrill Lynch Hamzah Mazari - Macquarie https://seekingalpha.com/article/4229566-cintas-corporation-ctas-on-q2-2019-results-earnings-call-transcript 1/26 S 12/4/21, 6:47 PM Cintas Corporation (CTAS) on Q2 2019 Results - Earnings Call Transcript _ Seeking Alpha Andrew Steinerman - JPMorgan George Tong - Go…	0
490	92.pdf	Nike Inc. (NYSE:NKE) Q2 2019 Results Earnings Conference Call December 20, 2018 5:00 PM ET	Mark Parker - Chairman, President and CEO Andrew Campion - CFO Analysts Lauren Cassel - Morgan Stanley Kate McShane - Citigroup Bob Drbul - Guggenheim Securities https://seekingalpha.com/article/4229565-nike-inc-nke-ceo-mark-parker-on-q2-2019-results-earnings-call-transcript 1/29 12/4/21, 6:48 PM Nike Inc. (NKE) CEO Mark Parker on Q2 2019 Results - Earnings Call Transcript _ Seeking Alpha Paul Tr…	0
491	93.pdf	CalAmp Corp. (NASDAQ:CAMP) Q3 2019 Earnings Conference Call December 20, 2018 4:30 PM ET	Michael Burdiek - President and Chief Executive Officer Kurt Binder - Chief Financial Officer Analysts Mike Walkley - Canaccord Genuity Scott Searle - ROTH Capital https://seekingalpha.com/article/4229564-calamp-corp-camp-ceo-michael-burdiek-on-q3-2019-results-earnings-call-transcript 1/28 12/4/21, 6:49 PM CalAmp Corp. (CAMP) CEO Michael Burdiek on Q3 2019 Results - Earnings Call Transcript _ See…	0
492	94.pdf	Neogen Corporation (NASDAQ:NEOG) Q2 2019 Earnings Conference Call December 20, 2018 11:00 AM ET	Jim Herbert - Executive Chairman Analysts Kevin Ellich - Craig-Hallum Andrew Brackmann - William Blair Steve Quinlan - Vice President and Chief Financial Officer https://seekingalpha.com/article/4229558-neogen-corporations-neog-ceo-john-adent-on-q2-2019-results-earnings-call-transcript 1/30 12/4/21, 6:49 PM Neogen Corporation's (NEOG) CEO John Adent on Q2 2019 Results - Earnings Call Transcript _…	0
493	95.pdf	Sanderson Farms, Inc (NASDAQ:SAFM) Q4 2018 Results Earnings Conference Call December 20, 2018 11:00 AM ET	Lampkin Butts - President and Chief Operating Officer Analysts Heather Jones - Vertical Group Ken Goldman - JPMorgan https://seekingalpha.com/article/4229553-sanderson-farms-inc-safm-ceo-joe-sanderson-on-q4-2018-results-earnings-call-transcript 1/30 12/4/21, 6:49 PM Sanderson Farms, Inc (SAFM) CEO Joe Sanderson on Q4 2018 Results - Earnings Call Transcript _ Seeking Alpha Kenneth Zaslow - Bank of…	1
494	96.pdf	RF Industries, Ltd. (NASDAQ:RFIL) Q4 2018 Earnings Conference Call December 20, 2018 4:30 AM ET	Analysts Operator Good day, everyone, and welcome to the RF Industries Fourth Quarter and Fiscal 2018 Financial Results Call. At this time, all participants are in a listen-only mode. Later, we will conduct a question-and-answer session. As a reminder, this call is being recorded today, Thursday, December 20, 2018. https://seekingalpha.com/article/4229552-rf-industries-ltd-rfil-ceo-robert-dawson-…	0
495	97.pdf	Colfax Corporation (NYSE:CFX) 2019 Outlook Conference Call December 19, 2018 8:00 AM ET	Nicole DeBlase - Deutsche Bank Jeff Hammond - KeyBanc Capital Markets Nathan Jones - Stifel Nicolaus Josh Pokrzywinski - Morgan Stanley Chris Dankert - Longbow Research Operator https://seekingalpha.com/article/4229546-colfax-corporation-cfx-ceo-matt-trerotola-on-2019-outlook-conference-call-transcript 1/20 12/4/21, 6:50 PM Operator Colfax Corporation (CFX) CEO Matt Trerotola on 2019 Outlook Conf…	0
496	98.pdf	Axalta Coating Systems (NYSE:AXTA) 2019 Financial Outlook Conference Call December 19, 2018 8:00 AM ET	Ghansham Panjabi - Robert W. Baird Duffy Fischer - Barclays John McNulty - BMO Capital Markets Harris Fein - Credit Suisse Dan Jester - Citibank Operator https://seekingalpha.com/article/4229542-axalta-coating-systems-axta-ceo-robert-bryant-hosts-2019-financial-outlook-conference-call 1/16 12/4/21, 6:50 PM Axalta Coating Systems (AXTA) CEO Robert Bryant Hosts 2019 Financial Outlook Conference Cal…	0
497	99.pdf	REV Group (NYSE:REVG) Q4 2018 Earnings Conference Call December 20, 2018 11:00 AM ET	Tim Sullivan - President and Chief Executive Officer Dean Nolden - Chief Financial Officer Analysts Jamie Cook - Credit Suisse Charley Brady - SunTrust https://seekingalpha.com/article/4229537-rev-group-revg-ceo-tim-sullivan-on-q4-2018-results-earnings-call-transcript 1/28 12/4/21, 6:50 PM REV Group (REVG) CEO Tim Sullivan on Q4 2018 Results - Earnings Call Transcript _ Seeking Alpha Mircea Dobre…	0
498	1.pdf	Anavex Life Sciences Corp. (NASDAQ:AVXL) Q4 2020 Earnings Conference Call December 28, 2020 4:30 PM ET	Company Participants Clint Tomlinson - Investor Relations Sandra Boenisch - Principal Financial Officer Conference Call Participants Charles Duncan - Cantor Fitzgerald Robert LeBoyer - Ladenburg Thalmann https://seekingalpha.com/article/4396544-anavex-life-sciences-corp-avxl-ceo-dr-christopher-missling-on-q4-2020-results-earnings-call 1/13 12/4/21, 7:32 PM Anavex Life Sciences Corp. (AVXL) CEO Dr…	0
499	10.pdf	HEICO Corporation (NYSE:HEI) Q4 2020 Earnings Conference Call December 22, 2020 9:00 AM ET	Eric Mendelson - Co-President and President of HEICO Flight Support Group Victor Mendelson - Co-President and President of HEICO Electronic Technologies Group Carlos Macau - Executive Vice President and Chief Financial Officer Conference Call Participants Peter Arment - Baird https://seekingalpha.com/article/4395859-heico-corporation-hei-ceo-laurans-mendelson-on-q4-2020-results-earnings-call-tran…	0
500	100.pdf	Fluor Corporation (NYSE:FLR) Q3 2020 Results Conference Call December 10, 2020 8:30 AM ET	Jason Landkamer - Director, IR Alan Boeckmann - Executive Chairman Carlos Hernandez - CEO Joe Brennan - CFO Conference Call Participants Andy Kaplowitz - Citi https://seekingalpha.com/article/4394080-fluor-corporation-flr-ceo-carlos-hernandez-on-q3-2020-results-earnings-call-transcript 1/28 12/4/21, 8:27 PM Fluor Corporation (FLR) CEO Carlos Hernandez on Q3 2020 Results - Earnings Call Transcript…	0
501	101.pdf	Uber Technologies, Inc. (NYSE:UBER) Barclays Global Technology, Media and Telecommunications Conference December 10, 2020 8:00 AM ET Nelson Chai - Chief Financial Officer	Ross Sandler All right. We are going to get started. Thank you everybody for joining us right early on here in the West Coast. So I would love the 5:00 A.M. fireside chat, California time. I am well caffeinated. We are super excited to have Nelson Chai from Uber joining us. This is second year in a row that Uber has attended our conference and we really appreciate that. https://seekingalpha.com/a…	0
502	102.pdf	Stratasys Ltd. (NASDAQ:SSYS) Stratasys to Acquire Origin Conference Call December 9, 2020 8:30 AM ET	Jim Ricchiuti - Needham & Company Shannon Cross - Cross Research Ananda Baruah - Loop Capital Markets Greg Palm - Craig-Hallum Capital Group Wamsi Mohan - Bank of America Merrill Lynch Kenneth Vallace Berenberg https://seekingalpha.com/article/4394068-stratasys-ltd-ssys-stratasys-to-acquire-origin-conference-call-transcript 1/22 12/4/21, 10:03 PM Stratasys Ltd. (SSYS) Stratasys to Acquire Origin …	0
503	103.pdf	DS Smith Plc (OTC:DITHF) Q2 2021 Earnings Conference Call December 10, 2020 4:00 AM ET	Barry Dixon - Davy Mikael Doepel - UBS Investment Bank Cole Hathorn - Jefferies Justin Jordan - Exane BNP Paribas Operator https://seekingalpha.com/article/4394064-ds-smith-plc-dithf-ceo-miles-roberts-on-q2-2021-results-earnings-call-transcript 1/26 12/4/21, 10:05 PM DS Smith Plc (DITHF) CEO Miles Roberts on Q2 2021 Results - Earnings Call Transcript _ Seeking Alpha Good morning, and welcome to o…	0
504	104.pdf	Lee Enterprises, Incorporated (NASDAQ:LEE) Q4 2020 Results Earnings Conference Call December 10, 2020 10:00 AM ET	Nathan Bekke - Vice President, Consumer Sales and Marketing Good day, everyone. And thank you for standing by. Welcome to the Lee Enterprises 2020 Fourth Quarter Webcast and Conference Call. The call is being recorded and will be available for replay beginning later this morning at lee.net. At the close of the planned remarks, there will be an opportunity for questions. [Operator Instructions] A …	1
505	105.pdf	Christopher & Banks Corporation (CBKC) Q3 2020 Earnings Conference Call December 10, 2020 8:30 AM ET	Keri Jones - President and Chief Executive Officer Richard Bundy - Chief Financial Officer Conference Call Participants Eric Beder - SCC Research Operator https://seekingalpha.com/article/4394051-christopher-and-banks-corporation-cbkc-ceo-keri-jones-on-q3-2020-results-earnings-call 1/10 12/4/21, 10:06 PM Christopher & Banks Corporation (CBKC) CEO Keri Jones on Q3 2020 Results - Earnings Call Tran…	1
506	106.pdf	Verizon Communications Inc. (NYSE:VZ) Barclays Global Technology, Media and Telecommunications Conference December 10, 2020 8:00 AM ET	Kannan Venkateshwar Great. Good morning, everybody. And welcome to today's session with Verizon. My name is Kannan Venkateshwar and I cover the North American cable telecom and media sectors at Barclays. Very happy this morning to have with us Verizon’s CFO, Matthew Ellis. Matt, welcome. Thanks for being with us this morning. Matthew Ellis https://seekingalpha.com/article/4394047-verizon-communic…	0
507	107.pdf	Groupon, Inc. (NASDAQ:GRPN) Barclays Global Technology, Media and Telecommunications Conference December 10, 2020 9:00 AM ET Company Participants	Deepak Mathivanan Great. Good morning, everybody. My name is Deepak Mathivanan. I'm the Internet Analyst here at Barclays and we're super excited to have Aaron Cooper from Groupon joining us today. Aaron thanks for joining us. Aaron Cooper https://seekingalpha.com/article/4394040-groupon-inc-grpn-ceo-aaron-cooper-presents-barclays-global-technology-media-and 1/14 12/4/21, 10:09 PM Groupon, Inc. (…	0
508	108.pdf	Play Earnings Call J.Jill, Inc. (NYSE:JILL) Q3 2020 Earnings Conference Call December 10, 2020 8:00 AM	Thank you for listening to the J.Jill Third Quarter Fiscal 2020 Earnings Commentary. Jim Scully, Interim CEO and Mark Webb, Executive Vice President and CFO will provide further remarks on the company's fiscal third quarter results ended October 31, 2020, which were announced with the press release dated December 10, 2020. Following today's remarks, there will be no question-and-answer session. h…	0
509	109.pdf	RH (NYSE:RH) Q3 2020 Results Earnings Conference Call December 9, 2020 5:00 PM ET	Gary Friedman - Chairman and CEO Jack Preston - Chief Financial Officer Conference Call Participants Adrienne Yih - Barclays Max Rakhlenko - Cowen and Company Steven Forbes - Guggenheim Securities C G G https://seekingalpha.com/article/4393997-rhs-rh-ceo-gary-friedman-on-q3-2020-results-earnings-call-transcript 1/49 12/4/21, 10:13 PM RH's (RH) CEO Gary Friedman on Q3 2020 Results - Earnings Call …	1
510	11.pdf	Neogen Corporation (NASDAQ:NEOG) Q2 2021 Earnings Conference Call December 22, 2020 11:00 AM ET	Steve Quinlan - CFO Conference Call Participants David Westenberg - Guggenheim Securities John Kreger - William Blair Mark Connelly - Stephens https://seekingalpha.com/article/4395844-neogen-corporations-neog-ceo-john-adent-on-q2-2021-results-earnings-call-transcript 1/20 12/4/21, 7:38 PM Neogen Corporation's (NEOG) CEO John Adent on Q2 2021 Results - Earnings Call Transcript _ Seeking Alpha Oper…	0
511	110.pdf	Comtech Telecommunications Corp. (NASDAQ:CMTL) Q1 2021 Results Conference Call December 9, 2020 4:30 PM ET	Fred Kornberg - Chairman and CEO Michael Porcelain - President and COO Michael Bondi - CFO Conference Call Participants Joe Gomes - Noble Capital https://seekingalpha.com/article/4393967-comtech-telecommunications-corp-s-cmtl-ceo-fred-kornberg-on-q1-2021-results-earnings-call 1/22 12/4/21, 10:14 PM Comtech Telecommunications Corp.'s (CMTL) CEO Fred Kornberg on Q1 2021 Results - Earnings Call Tran…	0
512	111.pdf	Enzo Biochem, Inc. (NYSE:ENZ) Q1 2021 Earnings Conference Call December 9, 2020 Play Earnings Call	Kyle Mikson - Cantor Fitzgerald Thomas O - Evermore Global Paul Nouri - Noble Equity Operator Greetings, and welcome to the Enzo Biochem First Quarter 2021 Earnings Call. At this time, all participants are in a listen-only mode. A brief question-and-answer session will follow the formal presentation. [Operator Instructions]. As a reminder, this conference is https://seekingalpha.com/article/43939…	0
513	112.pdf	Mesa Air Group, Inc. (NASDAQ:MESA) Q4 2020 Results Earnings Conference Call December 9, 2020 4:30 PM ET	Mike Lotz - President and CFO Brian Gillman - Executive VP and General Counsel Brad Rich - Chief Operating Officer Conference Call Participants Savi Syth - Raymond James https://seekingalpha.com/article/4393961-mesa-air-group-inc-s-mesa-ceo-jonathan-ornstein-on-q4-2020-results-earnings-call-transcript 1/22 12/4/21, 10:21 PM Mesa Air Group, Inc.'s (MESA) CEO Jonathan Ornstein on Q4 2020 Results - …	1
514	113.pdf	Evertz Technologies Ltd. (OTCPK:EVTZF) Q2 2021 Earnings Conference Call Play Earnings Call	Boyang Li - RBC Capital Markets Robert Young - Canaccord Steven Li - Raymond James Operator being recorded. Good day, and welcome to the Evertz’s Q2 2021 Conference Call. Today's conference is At this time I would like to turn the conference over to Brian Campbell Executive Vice https://seekingalpha.com/article/4393959-evertz-technologies-ltd-evtzf-q2-2021-results-earnings-call-transcript 1/15 12…	0
515	114.pdf	Genasys Inc. (NASDAQ:GNSS) Q4 2020 Earnings Conference Call December 9, 2020 4:30 PM ET	Mike Latimore - Northland Capital Ed Woo - Ascendiant Capital Ryan MacWilliams - Stephens Rick Neaton - Rivershore Investments Lloyd Korten - Unique Investments https://seekingalpha.com/article/4393958-genasys-inc-gnss-ceo-richard-danforth-on-q4-2020-results-earnings-call-transcript 1/18 12/4/21, 10:22 PM Genasys Inc. (GNSS) CEO Richard Danforth on Q4 2020 Results - Earnings Call Transcript _ See…	0
516	115.pdf	nCino, Inc. (NASDAQ:NCNO) Q3 2021 Earnings Conference Call December 9, 2020 4:30 PM ET	Brad Sills - Bank of America Merrill Lynch Terry Tillman - Truist Securities Josh Beck - Keybanc Brent Bracelin - Piper Sandler https://seekingalpha.com/article/4393956-ncino-inc-ncno-ceo-pierre-naude-on-q3-2021-results-earnings-call-transcript 1/24 12/4/21, 10:23 PM nCino, Inc. (NCNO) CEO Pierre Naude on Q3 2021 Results - Earnings Call Transcript _ Seeking Alpha Alex Sklar - Raymond James Operat…	0
517	116.pdf	Oxford Industries, Inc. (NYSE:OXM) Q3 2020 Earnings Conference Call December 9, 2020 4:30 PM ET	Tom Chubb - Chairman, Chief Executive Officer and President Scott Grassmyer - Executive Vice President, Finance, Chief Financial Officer and Controller Conference Call Participants Paul Lejuez - Citigroup Edward Yruma - KeyBanc Capital Markets https://seekingalpha.com/article/4393955-oxford-industries-inc-oxm-ceo-tom-chubb-on-q3-2020-results-earnings-call-transcript 1/16 12/4/21, 10:23 PM Oxford …	0
518	117.pdf	North West Company, Inc. (OTCPK:NNWWF) Q3 2020 Earnings Conference Call December 9, 2020 2:30 PM ET	John King - EVP & CFO Conference Call Participants Michael Van Aelst - TD Securities Stephen MacLeod - BMO Capital Markets Sabahat Khan - RBC Capital Markets https://seekingalpha.com/article/4393954-north-west-company-inc-nnwwf-ceo-edward-kennedy-on-q3-2020-results-earnings-call-transcript 1/29 12/4/21, 10:24 PM North West Company, Inc. (NNWWF) CEO Edward Kennedy on Q3 2020 Results - Earnings Cal…	1
519	118.pdf	Citigroup Inc. (NYSE:C.PK) The Goldman Sachs U.S. Financial Services Virtual Conference 2020 December 9, 2020 2:50 PM ET	Richard Ramsden Okay. So, good afternoon, everybody. I am very excited to introduce our next presenter who is Mark Mason, CFO of Citigroup. Mark has been with Citi for nineteen years. He has been CFO for almost two years and prior to being CFO of the Group, he was CFO of ICG and previously around the private bank in Citi Holdings. This is the second year that Mark is with us, obviously, this time…	0
520	119.pdf	The Williams Companies, Inc. (NYSE:WMB) 2020 Wells Fargo Virtual Midstream and Utility Symposium Conference Call December 9, 2020 3:20 PM ET	Praneeth Satish Okay, good afternoon. And thanks, everyone for sticking around this long to the final presentation of the day; we've -- we've saved the best for last here. Pleased to be joined by John Chandler, who is the SVP and CFO of Williams. I think we may also Danilo Juvane, who is the VP of Investor Relations. https://seekingalpha.com/article/4393950-williams-companies-inc-wmb-presents-202…	1
521	12.pdf	Calavo Growers, Inc. (NASDAQ:CVGW) Q4 2020 Earnings Conference Call December 21, 2020 4:30 PM ET	Company Participants Jim Gibson - Chief Executive Officer Kevin Manion - Chief Financial Officer Conference Call Participants Ben Bienvenu - Stephens Rob Dickerson - Jefferies https://seekingalpha.com/article/4395743-calavo-growers-inc-s-cvgw-ceo-jim-gibson-on-q4-2020-results-earnings-call-transcript 1/20 12/4/21, 7:38 PM Calavo Growers, Inc.'s (CVGW) CEO Jim Gibson on Q4 2020 Results - Earnings …	0
522	120.pdf	Verint Systems Inc. (NASDAQ:VRNT) Q3 2020 Earnings Conference Call December 9, 2020 4:30 PM ET	Alan Roden - SVP, Corporate Development Dan Bodner - CEO Doug Robinson - CFO Conference Call Participants Shaul Eyal - Oppenheimer Daniel Ives - Wedbush Securities https://seekingalpha.com/article/4393949-verint-systems-inc-vrnt-ceo-dan-bodner-on-q3-2020-results-earnings-call-transcript 1/25 12/4/21, 10:26 PM Verint Systems Inc. (VRNT) CEO Dan Bodner on Q3 2020 Results - Earnings Call Transcript …	0
523	121.pdf	Okta, Inc. (NASDAQ:OKTA) UBS Global TMT Virtual Conference December 9, 2020 2:50 PM ET	2:50 PM ET Company Participants Conference Call Participants Fatima Boolani - UBS Fatima Boolani Good afternoon, and thank you for joining us today on day three and the final day of the UBS Global TMT Conference. I'm your friendly neighborhood SMID software analyst here in the U.S., Fatima Boolani. And at this time, I have the pleasure of hosting F d i K t C F d d COO f Okt ith Th k f h i th t ht…	0
524	122.pdf	Dell Technologies Inc. (NYSE:DELL) Barclays Global Technology, Media and Telecommunications Conference December 9, 2020 3:30 PM ET Company Participants	Tim Long - Barclays Tim Long Hello everybody. Thank you for joining. Tim Long here at Barclays hosting a fireside chat with Dell. We have Dennis Hoffman, SVP, Corporate Strategy and SVP and GM of the Telecom Systems Business also a pretty long title. Thank you for joining us. https://seekingalpha.com/article/4393946-dell-technologies-inc-dell-management-presents-barclays-global-technology-media-a…	0
525	123.pdf	Digital Realty Trust, Inc. (NYSE:DLR.PK) UBS Global TMT Virtual Conference December 9, 2020 2:50 PM ET	John Hodulik Good afternoon, everyone. Again, I'm John Hodulik, telecom, media and communications infrastructure analyst here at UBS. And I'm very pleased to announce that our next speaker is Andy Power, the CFO of Digital Realty. He is joined by John Stewart, the Head of Investor Relations. Andy is in transit. So this session is going to be from his standpoint, audio-only. But Andy, thanks for j…	0
526	124.pdf	The Blackstone Group Inc. (NYSE:BX) The Goldman Sachs U.S. Financial Services Virtual Conference 2020 December 9, 2020 12:40 PM ET	Alexander Blostein Great Well, good afternoon, everybody. For our next session, it is my pleasure to welcome Steve Schwarzman, Chairman, Founder and CEO of Blackstone. With nearly $600 billion in assets under management, Blackstone remains the world's largest and most diversified alternative asset manager. Despite numerous challenges presented by the pandemic, the firm continues to generate solid…	1
527	125.pdf	Cisco Systems, Inc. (NASDAQ:CSCO) Barclays Global Technology, Media and Telecommunications Conference December 9, 2020 2:00 PM ET Bill Gartner - Senior Vice President & General Manager, Optical Systems & Optics	Conference Call Participants Tim Long - Barclays Tim Long Hello, everybody. Thank you for joining. Tim Long here at Barclays. Happy to have Bill Gartner who's the SVP and GM of Cisco's Optical Systems and Optics Group with us https://seekingalpha.com/article/4393943-cisco-systems-inc-csco-management-presents-barclays-global-technology-media-and 1/13 12/4/21, 10:29 PM Cisco Systems, Inc. (CSCO) Ma…	0
528	126.pdf	CrowdStrike Holdings, Inc. (NASDAQ:CRWD) Barclays Global Technology, Media and Telecommunications Conference December 9, 2020 1:30 PM ET	George Kurtz - President, CEO and Co-Founder Burt Podbere - Chief Financial Officer Maria Riley - Senior Director of Investor Relations Conference Call Participants https://seekingalpha.com/article/4393941-crowdstrike-holdings-inc-crwd-ceo-george-kurtz-presents-barclays-global-technology-media-and 1/15 12/4/21, 10:30 PM CrowdStrike Holdings, Inc. (CRWD) CEO George Kurtz Presents at Barclays Globa…	0
529	127.pdf	Barclays Global Technology, Media and Telecommunications Conference December 09, 2020, 14:30 PM ET	Raimo Lenschow - Barclays Raimo Lenschow Hi. Welcome to our next session. I'm really happy to have the CFO of ServiceNow on here with us. Gina, hi, thanks for joining us today. Gina Mastantuono Thanks Raimo I'm really excited to be here https://seekingalpha.com/article/4393935-servicenow-inc-now-management-presents-barclays-global-technology-media-and 1/11 12/4/21, 10:31 PM ServiceNow, Inc. (NOW)…	0
530	128.pdf	Dollarama Inc. (OTCPK:DLMAF) Q3 2021 Earnings Conference Call December 9, 2020 10:30 AM ET	Mark Petrie - CIBC Capital Markets Christopher Li - Desjardins Securities Inc. Peter Sklar - BMO Capital Markets Vishal Shreedhar - National Bank Financial, Inc Brian Morrison - TD Securities Equity Research https://seekingalpha.com/article/4393933-dollarama-inc-dlmaf-ceo-neil-rossy-on-q3-2021-results-earnings-call-transcript 1/30 12/4/21, 10:32 PM Dollarama Inc. (DLMAF) CEO Neil Rossy on Q3 2021…	0
531	129.pdf	Powell Industries, Inc. (NASDAQ:POWL) Q4 2020 Earnings Conference Call December 9, 2020 11:00 AM ET	Ryan Coleman - Alpha IR Group Brett Cope - President and CEO Michael Metcalf - EVP and CFO Conference Call Participants John Franzreb - Sidoti & Company Jon Braatz - Kansas City Capital https://seekingalpha.com/article/4393928-powell-industries-inc-powl-ceo-brett-cope-on-q4-2020-results-earnings-call-transcript 1/20 12/4/21, 10:33 PM Powell Industries, Inc. (POWL) CEO Brett Cope on Q4 2020 Result…	0
532	13.pdf	Vince Holding Corp. (NYSE:VNCE) Q3 2020 Earnings Conference Call December 21, 2020 4:30 PM ET	David Stefko - EVP, Interim CEO & CFO Conference Call Participants Dana Telsey - Telsey Advisory Group Operator https://seekingalpha.com/article/4395734-vince-holding-corp-vnce-ceo-david-stefko-on-q3-2020-results-earnings-call-transcript 1/13 12/4/21, 7:39 PM Vince Holding Corp. (VNCE) CEO David Stefko on Q3 2020 Results - Earnings Call Transcript _ Seeking Alpha Ladies and gentlemen, thank you f…	0
533	130.pdf	Qualcomm, Inc. (NASDAQ:QCOM) Barclays Global Technology, Media and Telecommunications Conference December 09, 2020, 12:00 ET	Conference Call Participants Blayne Curtis - Barclays Bank Blayne Curtis All right. Welcome back. I'm Blayne Curtis, semiconductor analyst at Barclays. Very happy to have for our next presentation, Qualcomm. Cristiano Amon is back with us. He's the President of Qualcomm Thanks for joining again https://seekingalpha.com/article/4393927-qualcomm-inc-qcom-presents-barclays-global-technology-media-an…	0
534	131.pdf	Crown Castle International Corp. (NASDAQ:REIT). (NYSE:CCI) Barclays Global Technology, Media and Telecommunications Conference December 9, 2020 1:30 PM ET	Question-and-Answer Session Q - Tim Long https://seekingalpha.com/article/4393925-crown-castle-international-corp-reit-cci-management-on-barclays-global-technology-media-and 1/12 12/4/21, 10:34 PM Crown Castle International Corp. (REIT). (CCI) Management on Barclays Global Technology, Media and Telecommunications Co… Hi, thank you everyone for joining. Tim Long here at Barclays [Indiscernible] an…	0
535	132.pdf	Salesforce.Com, Inc. (NYSE:CRM) UBS Global TMT Conference December 9, 2020 11:10 AM ET	Well, good morning, everybody. It's Karl Keirstead, and welcome to day 3 of the UBS TMT conference, the virtual version. I hope all of you are getting a lot out of the event this week. We are honored to host Salesforce, and in particular, the President and Chief Revenue Officer, Gavin Patterson. In terms of format, we'll go for about 35, 40 minutes for this keynote. If any of you have questions, …	0
536	133.pdf	Twitter, Inc. (NYSE:TWTR) Barclays Global Technology, Media and Telecommunications Conference 2020 December 9, 2020 1:00 PM ET	Ross Sandler Okay, we're going to get started. Thanks everybody for joining us. Again, for those who don’t know me, Ross Sandler. I run the Internet team here at Barclays. We're super excited to have Ned Segal from Twitter. He is actually at Twitter right now broadcasting from outside the office if you can believe that. So, Ned thanks again for joining us this year. I think this is three in a row…	0
537	134.pdf	Alphabet Inc. (NASDAQ:GOOG) UBS Global TMT Virtual Conference December 9, 2020 1:00 PM ET	Hi everyone, welcome to our next fireside chat. For those who don't know me, my name is Eric Sheridan, I'm UBS’s US Internet and Interactive Entertainment Analysts. Welcome to our conversation with Philipp Schindler, Senior Vice President and Chief Business Officer for Google. Some of the statements that Mr. Schindler may make today could be considered forward looking. These statements involve a …	0
538	135.pdf	Microsoft Corporation (NASDAQ:MSFT) Barclays 2020 Global Technology, Media and Telecommunications Conference December 9, 2020 12:30 PM ET	Raimo Lenschow - Barclays Raimo Lenschow straight into the gaming part. Tim Stuart Hey, welcome to our next session. We're here with Microsoft. We're talking gaming. Before we start, Tim, Catherine, maybe you can briefly introduce yourself, and then I go https://seekingalpha.com/article/4393917-microsoft-corporation-msft-presents-barclays-2020-global-technology-media-and 1/15 12/4/21, 10:37 PM Mi…	0
539	136.pdf	United Natural Foods, Inc. (NYSE:UNFI) Q1 2021 Earnings Conference Call December 9, 2020 8:30 AM ET	Steve Bloomquist - VP, IR Steven Spinner - Chairman and CEO Chris Testa - President John Howard - CFO Eric Dorne - COO Conference Call Participants https://seekingalpha.com/article/4393912-united-natural-foods-inc-unfi-ceo-steven-spinner-on-q1-2021-results-earnings-call-transcript 1/28 12/4/21, 10:37 PM United Natural Foods, Inc. (UNFI) CEO Steven Spinner on Q1 2021 Results - Earnings Call Transc…	0
540	137.pdf	The Lovesac Company (NASDAQ:LOVE) Q3 2021 Earnings Conference Call December 9, 2020 8:30 AM ET	Shawn Nelson - Chief Executive Officer Jack Krause - President and Chief Operating Officer Donna Dellomo - Chief Financial Officer Conference Call Participants Thomas Forte - D.A. Davidson https://seekingalpha.com/article/4393911-lovesac-company-love-ceo-shawn-nelson-on-q3-2021-results-earnings-call-transcript 1/29 12/4/21, 10:38 PM The Lovesac Company (LOVE) CEO Shawn Nelson on Q3 2021 Results -…	1
541	138.pdf	Hovnanian Enterprises, Inc. (NYSE:HOV) Q4 2020 Earnings Conference Call December 9, 2020 11:00 AM ET	Alan Ratner - Zelman & Associates Alex Barrón - Housing Research Operator Good morning, and thank you for joining us today for Hovnanian Enterprises Fiscal 2020 Fourth Quarter Earnings Conference Call. An archive of the webcast will be available after the completion of the call and run for 12 months. This conference is being recorded https://seekingalpha.com/article/4393910-hovnanian-enterprises-…	0
542	139.pdf	Vera Bradley, Inc. (NASDAQ:VRA) Q3 2021 Results Earnings Conference Call December 9, 2020 9:30 AM ET	Rob Wallstrom - Chief Executive Officer John Enwright - Chief Financial Officer Conference Call Participants Oliver Chen - Cowen Mark Altschwager - Baird https://seekingalpha.com/article/4393908-vera-bradley-inc-s-vra-ceo-rob-wallstrom-on-q3-2021-results-earnings-call-transcript 1/32 12/4/21, 10:39 PM Vera Bradley, Inc.'s (VRA) CEO Rob Wallstrom on Q3 2021 Results - Earnings Call Transcript _ See…	1
543	14.pdf	Enerpac Tool Group Corp. (NYSE:EPAC) Q1 2021 Earnings Conference Call December 21, 2020 11:00 AM ET	Bobbi Belstner - Director of IR and Strategy Randy Baker - President and CEO Jeff Schmaling - COO Rick Dillon - CFO Conference Call Participants Jeff Hammond - KeyBanc Capital Markets https://seekingalpha.com/article/4395702-enerpac-tool-group-corp-epac-ceo-randy-baker-on-q1-2021-results-earnings-call-transcript 1/30 12/4/21, 7:39 PM Enerpac Tool Group Corp. (EPAC) CEO Randy Baker on Q1 2021 Resu…	0
544	140.pdf	Moderna, Inc. (NASDAQ:MRNA) BMO Growth and ESG Conference Call December 9, 2020 8:00 AM ET	Hi. Good morning, everyone, and welcome to the second day of BMO's Growth and ESG Conference. My name is George Farmer. I'm Senior Biotechnology Analyst with BMO. And it is my pleasure today to have us -- have with us Lavina Talukdar, who's the Senior Vice President and Head of Investor Relations for Moderna. https://seekingalpha.com/article/4393901-moderna-inc-mrna-presents-bmo-growth-and-esg-co…	1
545	141.pdf	Prudential Financial, Inc. (NYSE:PRU) 2020 Goldman Sachs U.S. Financial Services Virtual Conference December 9, 2020 11:20 AM ET	Operator Yaron Kinar Good morning, everybody. Welcome back. Very happy to have with us today Charles Lowrey, Chairman and CEO of Prudential Financial. I am Yaron Kinar, the Insurance Analyst at Goldman. Just one housekeeping item. If you have any questions, please use the box at the https://seekingalpha.com/article/4393897-prudential-financial-inc-pru-ceo-charles-lowrey-presents-2020-goldman-sach…	1
546	142.pdf	AT&T Inc. (NYSE:T) Barclays Global Technology, Media and Telecommunications Conference December 9, 2020 10:00 AM ET	Kannan Venkateshwar All right. Okay. Good morning everyone and welcome to today's session with AT&T. My name is Kannan Venkateshwar and I cover the North American cable, telecom and media sectors at Barclays. I am very happy this morning to have with us President, Technology & Operations at AT&T, Scott Mair, with us. Scott, welcome and thanks for joining us this morning. https://seekingalpha.com/…	0
547	143.pdf	Veru, Inc. (NASDAQ:VERU) Q4 2020 Earnings Conference Call December 9, 2020 8:00 AM ET	Mitchell Steiner - Chairman, CEO, and President Michele Greco - CFO and CAO Conference Call Participants Brandon Folkes - Cantor Fitzgerald Yi Chen - H.C. Wainwright https://seekingalpha.com/article/4393888-veru-inc-veru-ceo-mitchell-steiner-on-q4-2020-results-earnings-call-transcript 1/31 12/4/21, 10:43 PM Veru, Inc. (VERU) CEO Mitchell Steiner on Q4 2020 Results - Earnings Call Transcript _ See…	0
548	144.pdf	Streamline Health Solutions, Inc. (NASDAQ:STRM) Q3 2020 Earnings Conference Call December 9, 2020 9:00 AM ET	Randy Salisbury - Chief Sales and Marketing Officer Tee Green - Chairman, President and CEO Tom Gibson - CFO Conference Call Participants Matt Hewitt - Craig-Hallum Brooks O'Neil - Lake Street Capital Markets https://seekingalpha.com/article/4393887-streamline-health-solutions-inc-strm-ceo-tee-green-on-q3-2020-results-earnings-call 1/21 12/4/21, 10:43 PM Streamline Health Solutions, Inc. (STRM) C…	1
549	145.pdf	Skyworks Solutions, Inc. (NASDAQ:SWKS) Barclays Global Technology, Media and Telecommunications Conference December 9, 2020 12:30 PM ET Company Participants	Blayne Curtis Skyworks. Question-and-Answer Session All right. Welcome back. I'm Blayne Curtis, Semiconductor Analyst at Barclays. Very happy to have with us for our next presentation Liam Griffin, he's President and CEO of https://seekingalpha.com/article/4393882-skyworks-solutions-inc-swks-ceo-liam-griffin-presents-barclays-global-technology-media-and 1/13 12/4/21, 10:44 PM Skyworks Solutions, …	1
550	146.pdf	U.S. Bancorp (NYSE:USB) The Goldman Sachs U.S. Financial Services Virtual Conference 2020 December 9, 2020 10:40 AM ET	Richard Ramsden - Goldman Sachs Richard Ramsden Okay. So I'm delighted to introduce our next presenters, who are Andy Cecere, Chairman and CEO of U.S. Bancorp; and Terry Dolan, who is the CFO. Between the two of them, they have almost six decades of experience at USB and they are regular presenters at this conference. And we genuinely appreciate you coming back every year to update us on the stra…	0
551	147.pdf	Zynga Inc. (NASDAQ:ZNGA) UBS Global TMT Virtual Conference December 9, 2020 9:20 AM ET	with Frank Gibeau, the CEO of Zynga. Frank, thanks so much for being part of UBS TMT conference done virtually this year. Frank Gibeau Question-and-Answer Session Q - Unidentified Company Representative Thank you, Eric [ph]. It's great to be here and I am looking for your conversation. https://seekingalpha.com/article/4393872-zynga-inc-znga-management-presents-ubs-global-tmt-virtual-conference-tr…	0
552	148.pdf	Mastercard Incorporated (NYSE:MA) Barclays Global TMT 2020 Conference December 9, 2020 10:30 AM ET	Ramsey Clark El-Assal Thanks everybody for joining us today. I'm here virtually with Mastercard's President of New Payments Platforms, Paul Stoddart and Warren Kneeshaw, Head of IR. Thank you for joining us, gentlemen. And maybe with that, we can we can hop right into some questions. So Paul, maybe you could give us the rundown on your background, your current role at Mastercard, good place to st…	0
553	149.pdf	Photronics, Inc. (NASDAQ:PLAB) Q4 2020 Results Conference Call December 9, 2020 8:30 AM ET	Troy Dewar - Vice President, Investor Relations Peter Kirlin - Chief Executive Officer John Jordan - Chief Financial Officer Chris Progler - Chief Technology Officer Conference Call Participants Patrick Ho - Stifel https://seekingalpha.com/article/4393865-photronics-inc-plab-ceo-peter-kirlin-on-q4-2020-results-earnings-call-transcript 1/14 12/4/21, 10:49 PM Photronics, Inc. (PLAB) CEO Peter Kirli…	1
554	15.pdf	FactSet Research Systems Inc. (NYSE:FDS) Q1 2021 Earnings Conference Call December 21, 2020 11:00 AM ET	Rima Hyder - VP, IR Phil Snow - CEO Helen Shan - CFO Conference Call Participants Andrew Nicholas - William Blair Manav Patnaik - Barclays https://seekingalpha.com/article/4395699-factset-research-systems-inc-s-fds-ceo-phil-snow-on-q1-2021-results-earnings-call-transcript 1/28 12/4/21, 7:39 PM FactSet Research Systems Inc.'s (FDS) CEO Phil Snow on Q1 2021 Results - Earnings Call Transcript _ Seek…	0
555	150.pdf	Campbell Soup Company (NYSE:CPB) Q1 2021 Earnings Conference Call December 9, 2020 8:30 AM ET	Rebecca Gardy - VP, Investor Relations Mark Clouse - President and CEO Mick Beekhuizen - EVP and CFO Conference Call Participants Andrew Lazar - Barclays Ken Goldman - JPMorgan https://seekingalpha.com/article/4393864-campbell-soup-company-cpb-ceo-mark-clouse-on-q1-2021-results-earnings-call-transcript 1/30 12/4/21, 10:51 PM Campbell Soup Company (CPB) CEO Mark Clouse on Q1 2021 Results - Earning…	0
556	151.pdf	Phreesia, Inc. (NYSE:PHR) Q3 2021 Results Earnings Conference Call December 9, 2020 8:30 AM ET	Balaji Gandhi - Vice President, Investor Relations Chaim Indig - Co-Founder and CEO Tom Altier - Chief Financial Officer Amy VanDuyn - Senior Vice President, Human Resources Conference Call Participants Anne Samuel - JPMorgan https://seekingalpha.com/article/4393863-phreesia-inc-s-phr-ceo-chaim-indig-on-q3-2021-results-earnings-call-transcript 1/32 12/4/21, 10:52 PM Phreesia, Inc.'s (PHR) CEO Cha…	1
557	152.pdf	Archer-Daniels-Midland Company (NYSE:ADM) BMO Growth & ESG Conference Call December 9, 2020 9:00 AM ET	Ken Zaslow - BMO Capital Markets Ken Zaslow Capital Markets. Good morning. My name is Ken Zaslow. I’m the Food & Agribusiness Analyst at BMO https://seekingalpha.com/article/4393858-archer-daniels-midland-company-adm-presents-bmo-growth-and-esg-conference-transcript 1/23 12/4/21, 10:53 PM Archer-Daniels-Midland Company (ADM) Presents at BMO Growth & ESG Conference (Transcript) _ Seeking Alpha Fir…	1
558	153.pdf	CRISPR Therapeutics AG (NASDAQ:CRSP) Phase 1/2 CTX001 Investor Update Call Play Earnings Call	Samarth Kulkarni - Chief Executive Officer of CRISPR Therapeutics. David Altshuler - Vertex's Executive Vice President of Global Research and Chief Scientific Officer Conference Call Participants Salveen Richter - Goldman Sachs Geoff Meacham - Bank of America Gena Wang - Barclays https://seekingalpha.com/article/4393857-crispr-therapeutics-ag-crsp-phase-1-2-ctx001-investor-update-transcript 1/26 …	0
559	154.pdf	FireEye, Inc. (FEYE) UBS Global TMT Virtual Conference December 9, 2020 9:20 AM ET	Fatima Boolani - UBS Operator Welcome to day three and our final day of the UBS Global TMT Conference. I'm your SMID software analyst, Fatima Boolani, and I have the pleasure of hosting FireEye this morning, CFO, Frank Verdecanna, but also I wanted to add a very positive addition to our lineup, to our discussion this morning. CEO, Kevin Mandia, is also joining us for our conversation. Gentlemen, …	1
560	155.pdf	British American Tobacco p.l.c. (NYSE:BTI) Q4 2020 Trading Update Conference Call December 9, 2020 4:00 AM ET	Gaurav Jain - Barclays Alicia Forry - Investec Sanath Sudarsan - Morgan Stanley Rey Wium - SBG Securities Alan Erskine - Credit Suisse https://seekingalpha.com/article/4393833-british-american-tobacco-p-l-c-bti-q4-2020-trading-update-conference-call-transcript 1/23 12/4/21, 10:55 PM British American Tobacco p.l.c. (BTI) Q4 2020 Trading Update Conference Call (Transcript) _ Seeking Alpha Operator …	1
561	156.pdf	Designer Brands Inc. (NYSE:DBI) Q3 2020 Earnings Conference Call December 9, 2020 8:30 AM ET	Roger Rawlins - Chief Executive Officer Jared Poff - Chief Financial Officer Conference Call Participants Sam Poser - Susquehanna Steve Marotta - CL King & Associates https://seekingalpha.com/article/4393831-designer-brands-inc-dbi-ceo-roger-rawlins-on-q3-2020-results-earnings-call-transcript 1/31 12/4/21, 10:56 PM Designer Brands Inc. (DBI) CEO Roger Rawlins on Q3 2020 Results - Earnings Call Tr…	1
562	157.pdf	Chewy, Inc. (NYSE:CHWY) Q3 2020 Earnings Conference Call December 8, 2020 5:00 PM ET	Sumit Singh - Chief Executive Officer Mario Marte - Chief Financial Officer Conference Call Participants Steph Wissink - Jefferies Cory Carpenter - JPMorgan https://seekingalpha.com/article/4393823-chewy-inc-s-chwy-ceo-sumit-singh-on-q3-2020-results-earnings-call-transcript 1/28 12/4/21, 10:57 PM Chewy, Inc.'s (CHWY) CEO Sumit Singh on Q3 2020 Results - Earnings Call Transcript _ Seeking Alpha Ma…	0
563	158.pdf	Sumo Logic, Inc. (NASDAQ:SUMO) Q3 2021 Earnings Conference Call December 7, 2020 4:30 PM ET	Matt Hedberg - RBC Capital Markets Sanjit Singh - Morgan Stanley Anmit Suri - William Blair Mark Murphy - JPMorgan https://seekingalpha.com/article/4393815-sumo-logic-inc-sumo-ceo-ramin-sayar-on-q3-2021-results-earnings-call-transcript 1/26 12/4/21, 10:58 PM Sumo Logic, Inc. (SUMO) CEO Ramin Sayar on Q3 2021 Results - Earnings Call Transcript _ Seeking Alpha Rob Owens - Piper Sandler Gray Powell …	0
564	159.pdf	Victrex plc (OTCPK:VTXPF) Q3 2020 Earnings Conference Call December 9, 2020 4:00 AM ET	Alex Stewart - Barclays Capital Mubasher Chaudhry - Citi Henry Carver - Peel Hunt Sebastian Bray - Berenberg Andrew Stott - UBS https://seekingalpha.com/article/4393811-victrex-plc-vtxpf-ceo-jakob-sigurdsson-on-q3-2020-results-earnings-call-transcript 1/35 12/4/21, 10:59 PM Victrex plc (VTXPF) CEO Jakob Sigurdsson on Q3 2020 Results - Earnings Call Transcript _ Seeking Alpha Maggie Schooley - Sti…	1
565	16.pdf	EnWave Corporation (OTCPK:NWVCF) Q4 2020 Earnings Conference Call December 21, 2020 10:00 AM ET	Bart Goemaere - Beurstips Neil Linsdell - Industrial Alliance Operator Good morning. Welcome to EnWave Corporation's Fourth Quarter and Fiscal Year 2020 Earnings Conference Call. My name is Rob and I'll be your operator for today's call. https://seekingalpha.com/article/4395689-enwave-corporation-nwvcf-ceo-brent-charleton-on-q4-2020-results-earnings-call-transcript 1/25 12/4/21, 7:40 PM EnWave Co…	0
566	160.pdf	Guidewire Software, Inc. (NYSE:GWRE) Q1 2021 Results Earnings Conference Call December 8, 2020 5:00 PM ET	Mike Rosenbaum - Chief Executive Officer Jeff Cooper - Chief Financial Officer Conference Call Participants Sterling Auty - JP Morgan Bhavan Suri - William Blair https://seekingalpha.com/article/4393747-guidewire-software-inc-s-gwre-ceo-mike-rosenbaum-on-q1-2021-results-earnings-call-transcript 1/37 12/4/21, 10:59 PM Guidewire Software, Inc.'s (GWRE) CEO Mike Rosenbaum on Q1 2021 Results - Earnin…	0
567	161.pdf	Newmont Corporation (NYSE:NEM) 2021 Investor Update Conference Call December 8, 2020 9:00 AM ET	Dean Gehring - Executive Vice President and Chief Technology Officer Stephen Gottesfeld - Executive Vice President and Chief Sustainability Officer Conference Call Participants Fahad Tariq - Credit Suisse Josh Wolfson - RBC Capital Markets Jackie Przybylowski BMO Capital https://seekingalpha.com/article/4393745-newmont-corporation-nem-ceo-tom-palmer-hosts-2021-investor-update-call-transcript 1/50…	0
568	162.pdf	MongoDB, Inc. (NASDAQ:MDB) Q3 2021 Earnings Conference Call December 8, 2020 5:00 PM ET	Company Participants Brian Denyeau - IR, ICR Conference Call Participants Raimo Lenschow - Barclays Sanjit Singh - Morgan Stanley https://seekingalpha.com/article/4393736-mongodb-inc-mdb-ceo-dev-ittycheria-on-q3-2021-results-earnings-call-transcript 1/30 12/4/21, 11:01 PM MongoDB, Inc. (MDB) CEO Dev Ittycheria on Q3 2021 Results - Earnings Call Transcript _ Seeking Alpha Brent Bracelin - Piper Sa…	0
569	163.pdf	H&R Block, Inc. (NYSE:HRB) Investor Day December 8, 2020 10:00 AM ET	Kirk Simpson - CEO, Co-Founder & Director, Wave Financial Inc. Karen Orosco - SVP, U.S. Retail Sales & Service Les Whiting - Chief Financial Services Officer Julius Lai - Chief Product & Experience Officer Heather Watts - SVP, DIY Tax Tony Bowen - CFO Colby Brown - VP & Corporate Controller https://seekingalpha.com/article/4393734-h-and-r-block-inc-hrb-presents-investor-day-transcript 1/46 12/4/2…	1
570	164.pdf	GameStop Corp. (NYSE:GME) Q3 2020 Results Conference Call December 8, 2020 5:00 PM ET	Eric Cerny - IR George Sherman - CEO Jim Bell - EVP & CFO Conference Call Participants Ashley Helgans - Jefferies Colin Sebastian - Robert W. Baird https://seekingalpha.com/article/4393729-gamestop-corp-gme-ceo-george-sherman-on-q3-2020-results-earnings-call-transcript 1/28 12/4/21, 11:03 PM GameStop Corp. (GME) CEO George Sherman on Q3 2020 Results - Earnings Call Transcript _ Seeking Alpha Will…	0
571	165.pdf	Amgen Inc. (NASDAQ:AMGN) Post ASH 2020 Oncology Update Conference Call December 8, 2020 4:00 PM ET	Terence Flynn - Goldman Sachs Michael Yee - Jefferies Evan Seigerman - Credit Suisse Geoff Meacham - Bank of America Dr. Greg Friberg - VP, Global Development and Oncology Therapeutic Area Head https://seekingalpha.com/article/4393727-amgen-inc-amgn-post-ash-2020-oncology-update-conference-transcript 1/28 12/4/21, 11:04 PM Amgen Inc. (AMGN) Post ASH 2020 Oncology Update Conference (Transcript) _ …	0
572	166.pdf	AeroVironment, Inc. (NASDAQ:AVAV) Q2 2021 Earnings Conference Call December 8, 2020 4:30 PM ET	Steven Gitlin - Chief Marketing Officer and Vice President of Investor Relations Wahid Nawabi - President and Chief Executive Officer Kevin McDonnell - SVP and Chief Financial Officer Conference Call Participants Ken Herbert - Canaccord Genuity Pete Skibitski - Alembic Global Advisors https://seekingalpha.com/article/4393726-aerovironment-inc-s-avav-ceo-wahid-nawabi-on-q2-2021-results-earnings-ca…	0
573	167.pdf	Dell Technologies Inc. (NYSE:DELL) Raymond James Technology Investors Conference Call December 8, 2020 3:20 PM ET	David Vogt Good afternoon, everyone and thank you for joining us today at the UBS Global TMT Conference. My name is David Vogt. I am the enterprise hardware and networking analyst here at UBS. And with me today, I am excited to have from Dell Technologies, Matt Baker. Matt is the Senior Vice President of Strategy and Planning for Dell EMC. Matt, just a little bit about Matt’s background, he leads…	0
574	168.pdf	T-Mobile US, Inc. (NASDAQ:TMUS) UBS Global TMT Virtual Conference December 8, 2020 4:40 PM ET	President and CEO of T-Mobile U.S. Mike, thanks for joining us. Mike Sievert I'm John Hodulik. I'm the media telecom and communications infrastructure analyst here at UBS. And I'm very pleased to announce our afternoon keynote speaker, Mike Sievert, Thanks, John. It's great to be here. I'm sorry it's virtual. I think you've had an incredible https://seekingalpha.com/article/4393719-t-mobile-us-in…	1
575	169.pdf	BlackRock, Inc. (NYSE:BLK) 2020 Goldman Sachs US Financial Services Conference December 8, 2020 3:00 PM ET	Good afternoon, everybody. Next, it is my pleasure to welcome Gary Shedlin, CFO of BlackRock. With nearly $1 trillion in assets under management, BlackRock is the largest asset manager in the world, with an industry leading 6% organic asset growth over the last 12 months, and more impressively, a 7% organic fee base growth over the same time period. In addition to its leading ETF business, BlackR…	0
576	17.pdf	Optical Cable Corporation (NASDAQ:OCC) Q4 2020 Earnings Conference Call December 21, 2020 10:00 AM ET	Good morning. My name is Nicole, and I will be your conference operator today. At this time, I would like to welcome you to the Optical Cable Corporation Fourth Quarter and Full-Year 2020 Earnings Conference Call. All lines have been placed on mute to prevent any background noise. After the speakers’ remarks, there will be a question-and-answer session. [Operator Instructions] It is now my pleasu…	0
577	170.pdf	VMware, Inc. (NYSE:VMW) Raymond James Technology Investors Conference December 8, 2020 3:20 PM ET	Sanjay Poonen - Chief Operating Officer, Customer Operations Robert Majeck - Infrastructure software analyst at Raymond James Great. Looks like we are live. Everyone welcome back. I'm Robert Majeck, infrastructure software analyst at Raymond James. It’s day two of our Tech Conference and I’m excited to be here with VMware. So with us here today, Sanjay Poonen, Chief Operating Officer, Customer Op…	0
578	171.pdf	Microsoft Corporation (NASDAQ:MSFT) UBS Global TMT Virtual Conference December 8, 2020 1:55 PM ET	Well, good afternoon everybody. Its Karl Keirstead at UBS. Super happy to have Microsoft keynoting the 2020 Virtual UBS TMT Conference, and especially delighted to have Judson Althoff here, who is the Executive Vice President of Worldwide Commercial Business. Judson can elaborate, but think of Microsoft is having a consumer element, a commercial element and Judson essentially heads up the entire …	0
579	172.pdf	Magellan Midstream Partners, L.P. (NYSE:MMP) Wells Fargo Midstream and Utility Symposium December 8, 2020 2:00 PM ET	Praneeth Satish Okay. Good afternoon, and thanks to everyone for joining us today. I'm pleased to be joined by Michael Mears, who is Chairman, President and CEO of Magellan Midstream Partners. The format of this will be a Virtual Fireside Chat. Hopefully the last one, we can get back to doing this in person next year. I know, I for one, I'm getting tired of these virtual backgrounds, not even sur…	0
580	173.pdf	Oil-Dri Corporation of America (NYSE:ODC) Q1 2021 Earnings Conference Call December 8, 2020 10:30 AM ET	Susan Kreh - CFO Conference Call Participants Operator Jessica Moskowitz - VP, General Manager, Consumer Products Division Fred Kao - VP, Global Sales, Amlan International https://seekingalpha.com/article/4393708-oil-dri-corporation-of-americas-odc-ceo-dan-jaffee-on-q1-2021-results-earnings-call 1/29 12/5/21, 10:18 AM Oil-Dri Corporation of America's (ODC) CEO Dan Jaffee on Q1 2021 Results - Earn…	0
581	174.pdf	AutoZone, Inc. (NYSE:AZO) Q1 2021 Earnings Conference Call December 8, 2020 10:00 AM ET	William Rhodes - Chairman, President and Chief Executive Officer William Giles - Executive Vice President and Chief Financial Officer Jamere Jackson - Executive Vice President and Chief Financial Officer-elect Conference Call Participants Bret Jordan - Jefferies LLC Simeon Gutman - Morgan Stanley https://seekingalpha.com/article/4393704-autozone-inc-azo-ceo-william-rhodes-on-q1-2021-results-earni…	1
582	175.pdf	Star Group, L.P. (NYSE:SGU) Q4 2020 Earnings Conference Call December 8, 2020 11:00 AM ET	Michael Prouting - 10K Capital Tim Mullen - Laurelton Management Operator Good morning and welcome to the Star Group Fiscal 2020 Fourth Quarter Earnings Call. [Operator Instructions] Please note that this event is being recorded. Now, I’d like to turn the conference over to Mr. Chris Witty, Investor Relations moderator. Please go https://seekingalpha.com/article/4393701-star-group-l-p-sgu-ceo-jef…	1
583	176.pdf	KKR & Co. Inc. (NYSE:KKR) Goldman Sachs U.S. Financial Services Conference December 8, 2020 1:00 PM ET	Great. Good afternoon, everybody. Next, I'd like to welcome Scott Nuttall, Co-President and Co-COO of KKR. Over the last year, KKR has delivered an industry-leading investment performance with private equity returns of over 25% on a trailing 12 month basis despite quite significant market dislocations, deployed meaningful amount of capital, and embarked on a new fundraising super cycle. Of course…	1
584	177.pdf	Conn's, Inc. (NASDAQ:CONN) Q3 2021 Earnings Conference Call December 8, 2020 11:00 AM ET	Lee Wright - COO George Bchara - CFO Conference Call Participants Rick Nelson - Stephens Brad Thomas - KeyBanc Capital Markets https://seekingalpha.com/article/4393694-conns-inc-conn-ceo-norm-miller-on-q3-2021-results-earnings-call-transcript 1/21 12/5/21, 10:21 AM Conn's, Inc. (CONN) CEO Norm Miller on Q3 2021 Results - Earnings Call Transcript _ Seeking Alpha Brian Nagel - Oppenheimer & Company…	0
585	178.pdf	ViacomCBS, Inc. (NASDAQ:VIAC) UBS Global TMT Conference December 8, 2020 1:00 PM ET	Hi. It's John Hodulik, the telecom, media and communications infrastructure analyst here at UBS. And I am pleased to introduce Bob Bakish, the President and CEO of ViacomCBS as our lunch keynote speaker. Bob, thanks for being here. Bob Bakish Thanks, John. Real pleasure to be here virtually. Look forward to doing it in person next time, but great to be here for lunch virtually. https://seekingalp…	1
586	179.pdf	CrowdStrike Holdings, Inc. (NASDAQ:CRWD) UBS Global TMT Virtual Conference December 8, 2020 12:05 PM ET	Conference Call Participants Fatima Boolani - UBS Fatima Boolani All right, I think we're rocking and rolling. Well, to those of you who has joined us good morning, good afternoon to day two of the UBS Global TMT Conference. I am your host for this fireside chat with CrowdStrike, Fatima Boolani, software analyst on the tech t h I th ill d t b h ti i h i thi i t l t ith B t P db https://seekingalp…	0
587	18.pdf	NIKE, Inc. (NYSE:NKE) Q2 2021 Results Conference Call December 18, 2020 5:00 PM ET	John Donahoe - President and CEO Matt Friend - CFO Conference Call Participants Adrienne Yih - Barclays Bob Drbul - Guggenheim https://seekingalpha.com/article/4395434-nike-inc-nke-ceo-john-donahoe-on-q2-2021-results-earnings-call-transcript 1/27 12/4/21, 7:41 PM NIKE, Inc. (NKE) CEO John Donahoe on Q2 2021 Results - Earnings Call Transcript _ Seeking Alpha Michael Binetti - Credit Suisse Kimberl…	0
588	180.pdf	Ceylon Graphite Corp. (OTCQB:CYLYF) Special Call December 8, 2020 8:30 AM ET Company Participants	today: Bharat Parashar, Chairman and Chief Executive Officer, and Sasha Jacob, Founder and Strategic Advisor. The team is going to walk you through a company presentation and after that, we will be taking questions. As a reminder, you can always submit your questions on the right-hand side on the Q&A panel. Now, without further ado, I'm going to pass it over to Bharat to kick things off. Bharat P…	0
589	181.pdf	John Wiley & Sons, Inc. (NYSE:JW.A) Q2 2021 Earnings Conference Call December 8, 2020 10:00 AM ET	Brian Napack - President & Chief Executive Officer John Kritzmacher - Chief Financial Officer Conference Call Participants Daniel Moore - CJS Securities Sami Kassab - Exane BNP https://seekingalpha.com/article/4393687-john-wiley-and-sons-inc-jw-ceo-brian-napack-on-q2-2021-results-earnings-call-transcript 1/30 12/5/21, 10:26 AM John Wiley & Sons, Inc. (JW.A) CEO Brian Napack on Q2 2021 Results - E…	1
590	182.pdf	Comcast Corporation (NASDAQ:CMCSA) UBS Global TMT Virtual Conference December 8, 2020 10:15 AM ET	John Hodulik Jeff Shell John Hodulik …the telecom media and communications infrastructure analysts at UBS and I'm here this morning with Jeff Shell, the CEO of NBCUniversal. Jeff, thanks for being here. Thanks kind of here, I mean here-ish, but nice to see. https://seekingalpha.com/article/4393682-comcast-corporation-cmcsa-management-presents-ubs-global-tmt-virtual-conference-transcript 1/21 12/5…	0
591	183.pdf	G-III Apparel Group, Ltd. (NASDAQ:GIII) Q3 2021 Earnings Conference Call December 8, 2020 8:30 AM ET	Morris Goldfarb - Chairman & Chief Executive Officer Conference Call Participants Edward Yruma - KeyBanc Capital Markets, Inc. Erinn Murphy - Piper Sandler & Co. Heather Balsky - Bank of America https://seekingalpha.com/article/4393678-g-iii-apparel-group-ltd-s-giii-ceo-morris-goldfarb-on-q3-2021-results-earnings-call 1/23 12/5/21, 10:28 AM G-III Apparel Group, Ltd.'s (GIII) CEO Morris Goldfarb o…	0
592	184.pdf	Brown-Forman Corporation (NYSE:BF.B) Q2 2021 Results Conference Call December 8, 2020 10:00 AM ET	Lawson Whiting - President and CEO Jane Morreau - EVP and CFO Conference Call Participants Steve Powers - Deutsche Bank Sean King - UBS Leanne Cunningham - SVP, Shareholder Relations Officer https://seekingalpha.com/article/4393663-brown-forman-corporation-bf-b-ceo-lawson-whiting-on-q2-2021-results-earnings-call-transcript 1/26 12/5/21, 10:29 AM Brown-Forman Corporation (BF.B) CEO Lawson Whiting …	0
593	185.pdf	Toll Brothers, Inc. (NYSE:TOL) Q4 2020 Results Earnings Conference Call December 8, 2020 11:00 AM ET	Marty Connor - Chief Financial Officer Fred Cooper - Senior VP of Finance and Investor Relations Wendy Marlett - Chief Marketing Officer Gregg Ziegler - Senior VP and Treasurer Conference Call Participants https://seekingalpha.com/article/4393662-toll-brothers-inc-tol-ceo-douglas-yearley-on-q4-2020-results-earnings-call-transcript 1/39 12/5/21, 10:30 AM Toll Brothers, Inc. (TOL) CEO Douglas Yearl…	0
594	186.pdf	Toll Brothers, Inc. (NYSE:TOL) Q4 2020 Results Earnings Conference Call December 8, 2020 11:00 AM ET	Marty Connor - Chief Financial Officer Fred Cooper - Senior VP of Finance and Investor Relations Wendy Marlett - Chief Marketing Officer Gregg Ziegler - Senior VP and Treasurer Conference Call Participants https://seekingalpha.com/article/4393662-toll-brothers-inc-tol-ceo-douglas-yearley-on-q4-2020-results-earnings-call-transcript 1/39 12/5/21, 10:32 AM Toll Brothers, Inc. (TOL) CEO Douglas Yearl…	0
595	187.pdf	Workday, Inc. (NASDAQ:WDAY) UBS Global TMT Virtual Conference Transcript December 8, 2020 7:30 AM ET	Hey. It’s Karl Keirstead. Thanks for joining this virtual fireside chat with Workday at the 2020 UBS TMT Conference. As you are likely aware, we have got Chano Fernandez, the Co-CEO of Workday. In terms of format, we will stick to about 35 minutes, 40 minutes. You can ask questions if you would like, either through the web link, I think, all of you have, or of course, feel free to e-mail me direc…	0
596	188.pdf	Alico, Inc. (NASDAQ:ALCO) Q4 2020 Earnings Conference Call December 8, 2020 8:30 AM ET	Operator Welcome to Alico's Fourth Quarter and Full Year 2020 Earnings Conference Call. [Operator Instructions] As a reminder, today's conference is being recorded. I would like to now turn the call over to your host, Mr. John Mills with ICR. John Mills Thank you Darryl Good morning and thank you for joining us for Alico's fourth quarter https://seekingalpha.com/article/4393652-alico-inc-alco-ceo…	0
597	189.pdf	American Express Company (NYSE:AXP) Goldman Sachs U.S. Financial Services Conference December 8, 2020 9:20 AM ET	Ryan Nash Hello everyone. And up next, we are excited to have American Express once again. You know, American Express has been putting up consistent high single digit top line growth and double digit EPS growth prior to the pandemic. And it was able to successfully pivot its business towards varying and value enhancing propositions as it awaits for the return of travel and some more discretionary…	0
598	19.pdf	Darden Restaurants, Inc. (NYSE:DRI) Q2 2021 Earnings Conference Call December 18, 2020 8:30 AM ET	Kevin Kalicak - Investor Relations Gene Lee - Chief Executive Officer Rick Cardenas - Chief Financial Officer Conference Call Participants David Tarantino - Baird Chris O’Cull - Stifel https://seekingalpha.com/article/4395432-darden-restaurants-inc-dri-ceo-gene-lee-on-q2-2021-results-earnings-call-transcript 1/49 12/4/21, 7:41 PM Darden Restaurants, Inc. (DRI) CEO Gene Lee on Q2 2021 Results - Ea…	0
599	190.pdf	Liquidity Services, Inc. (NASDAQ:LQDT) Q4 2020 Earnings Conference Call December 8, 2020 10:30 AM ET	Julie Davis - Senior Director, IR Jorge Celaya - EVP & CFO Conference Call Participants William Angrick - Co-founder, Chairman & CEO Gary Prestopino - Barrington Research Associates Dalton Kern - Robert W. Baird & Co. https://seekingalpha.com/article/4393645-liquidity-services-inc-s-lqdt-ceo-william-angrick-on-q4-2020-results-earnings-call-transcript 1/20 12/5/21, 10:39 AM Liquidity Services, Inc…	0
600	191.pdf	KLX Energy Services Holdings, Inc. (NASDAQ:KLXE) Q3 2020 Results Conference Call Chris Baker - President and Chief Executive Officer	Ken Dennard - Investor Relations Conference Call Participants Ian Macpherson - Simmons Energy Jaime Perez - RF Lafferty & Co https://seekingalpha.com/article/4393643-klx-energy-services-holdings-inc-s-klxe-ceo-chris-baker-on-q3-2020-results-earnings-call 1/18 12/5/21, 10:41 AM KLX Energy Services Holdings, Inc.'s (KLXE) CEO Chris Baker on Q3 2020 Results - Earnings Call Transcript _ Seeking Alpha…	0
601	192.pdf	Cantel Medical Corp. (CMD) Q1 2021 Earnings Conference Call December 8, 2020 8:30 AM ET	Matt Micowski - VP, IR and Financial Planning and Analysis Seth Yellin - EVP, Strategy and Corporate Development Brian Capone - SVP, Corporate Controller and Chief Accounting Officer Conference Call Participants Matt Mishan - KeyBanc Capital Markets https://seekingalpha.com/article/4393632-cantel-medical-corp-cmd-ceo-george-fotiades-on-q1-2021-results-earnings-call-transcript 1/28 12/5/21, 10:42 …	0
602	193.pdf	Barnes & Noble Education, Inc. (NYSE:BNED) Q2 2021 Earnings Conference Call December 8, 2020 8:30 AM ET	Mike Huseby - Chairman and CEO Tom Donohue - CFO Jonathan Shar - EVP, BNED Retail and Client Solutions Lisa Malat - President, Barnes & Noble College David Henderson - President, MBS https://seekingalpha.com/article/4393631-barnes-and-noble-education-inc-bned-ceo-mike-huseby-on-q2-2021-results-earnings-call 1/22 12/5/21, 10:43 AM Barnes & Noble Education, Inc. (BNED) CEO Mike Huseby on Q2 2021 Re…	0
603	194.pdf	Enterprise Products Partners L.P. (NYSE:EPD) Wells Fargo Midstream and Utility Symposium Conference Call December 8, 2020 10:40 AM ET	Michael Blum - Wells Fargo Michael Blum Hi. Good morning, everyone, and thanks for joining us. We are – let me start by saying that, I'm hoping this is our first and last virtual conference. We hope to do this live in New York next year. I'm joined today by Jim Teague, CEO. He's the guy in the white shirt, I think. And Randy Fowler, Co-CEO and CFO, he's in the blue shirt of Enterprise Products Pa…	0
604	195.pdf	AT&T Inc. (NYSE:T) UBS Global TMT Virtual Conference December 8, 2020 9:20 AM ET	John Stankey John Hodulik John, thanks for having me in. Good morning. My name is John Hodulik. I am the telecom, media and communications analysts here at UBS. Thank you all for joining. I am pleased to introduce our keynote speaker this morning, John Stankey, the CEO of AT&T. John, thanks for being here. https://seekingalpha.com/article/4393629-t-inc-t-ceo-john-stankey-ubs-global-tmt-virtual-br…	0
605	196.pdf	Casey's General Stores, Inc. (NASDAQ:CASY) Q2 2021 Earnings Conference Call December 8, 2020 8:30 AM ET	Darren Rebelez - President and Chief Executive Officer Steve Bramlage - Chief Financial Officer Conference Call Participants Karen Short - Barclays Ben Bienvenu - Stephens Inc https://seekingalpha.com/article/4393624-caseys-general-stores-inc-casy-ceo-darren-rebelez-on-q2-2021-results-earnings-call-transcript 1/30 12/5/21, 10:46 AM Casey's General Stores, Inc. (CASY) CEO Darren Rebelez on Q2 2021…	0
606	197.pdf	RYB Education, Inc. (NYSE:RYB) Q3 2020 Earnings Conference Call December 8, 2020 8:00 AM ET	Operator Yanlai Shi - Co-Founder, Director and CEO Hello, ladies and gentlemen, thank you for standing by for the RYB Education, Inc.'s Third Quarter 2020 Earnings Conference Call. At this time, all participants are in a listen-only mode. After management's prepared remarks, there will be a question-and- answer session. Today’s conference call is being recorded. https://seekingalpha.com/article/4…	0
607	198.pdf	Aflac Incorporated (NYSE:AFL) The Goldman Sachs U.S. Financial Services Virtual Conference 2020 December 8, 2020 8:40 AM ET	Yaron Kinar - Goldman Sachs Yaron Kinar Good morning, everybody. Welcome to the Goldman Sachs' Financial Services Conference. I'm very happy to have with me today, Aflac's President and COO, Fred Crawford; and CFO, Max Broden. https://seekingalpha.com/article/4393611-aflac-incorporateds-afl-management-presents-goldman-sachs-u-s-financial-services-virtual 1/19 12/5/21, 10:48 AM Aflac Incorporated'…	1
608	199.pdf	Ashtead Group plc (OTCPK:ASHTF) Q2 2021 Earnings Conference Call December 8, 2020 5:00 AM ET	Rory McKenzie - UBS Will Kirkness - Jefferies Arnaud Lehman - Bank of America Merrill Lynch Robert Wertheimer - Melius Research Edward Stanley - Morgan Stanley https://seekingalpha.com/article/4393601-ashtead-group-plc-ashtf-ceo-brendan-horgan-on-q2-2021-results-earnings-call-transcript 1/31 12/5/21, 10:49 AM Ashtead Group plc (ASHTF) CEO Brendan Horgan on Q2 2021 Results - Earnings Call Transcri…	0
609	2.pdf	Weibo Corporation (NASDAQ:WB) Q3 2020 Earnings Conference Call December 28, 2020 6:00 AM ET	Conference Call Participants Alicia Yap - Citigroup Tian Hou - TH Capital Fei Cao - Vice President of Finance and Interim Chief Financial Officer https://seekingalpha.com/article/4396498-weibo-corporations-wb-ceo-gaofei-wang-on-q3-2020-results-earnings-call-transcript 1/20 12/4/21, 7:35 PM Weibo Corporation's (WB) CEO Gaofei Wang on Q3 2020 Results - Earnings Call Transcript _ Seeking Alpha Miran…	1
610	20.pdf	Winnebago Industries, Inc. (NYSE:WGO) Q1 2021 Earnings Conference Call December 18, 2020 10:00 AM ET	Michael Happe - President & Chief Executive Officer Bryan Hughes - Vice President & Chief Financial Officer Conference Call Participants Craig Kennison - Baird Scott Stember - CL King https://seekingalpha.com/article/4395396-winnebago-industries-inc-wgo-ceo-michael-happe-on-q1-2021-results-earnings-call-transcript 1/35 12/4/21, 7:41 PM Winnebago Industries, Inc. (WGO) CEO Michael Happe on Q1 2021…	1
611	200.pdf	Wells Fargo & Company (NYSE:WFC) The Goldman Sachs U.S. Financial Services Virtual Conference December 8, 2020 8:00 AM ET	Richard Ramsden So, good morning, everyone. Before we start, we're required to make certain disclosures about Goldman Sachs' relationships with companies we discuss. Those disclosures are available on the webcast page. So with that I'm delighted to introduce our first speaker for our 2020 Financial Services Conference who is Charlie Scharf, President and CEO of Wells Fargo. https://seekingalpha.c…	1
612	201.pdf	Cisco Systems, Inc. (NASDAQ:CSCO) Raymond James Technology Investors Conference December 7, 2020 3:02 PM ET	Simon Leopold - Raymond James Simon Leopold Well, folks, thanks for joining us. This is Simon Leopold, Raymond James data infrastructure analyst here at our tech conference held virtually in the cloud. For our next session we'll have Cisco and presenting in the fireside discussion will be Gee Rittenhouse. We also have Emily Hunt from the IR department. https://seekingalpha.com/article/4393595-cis…	0
613	202.pdf	Regeneron Pharmaceuticals, Inc. (NASDAQ:REGN) Investor Event ASH 2020 Conference Call December 7, 2020 4:30 PM ET	Israel Lowy - Vice President, Clinical Sciences and Head of Translational Science & Oncology Andres Sirulnik - Senior Vice President, Translational & Clinical Sciences Conference Call Participants Evan Seigerman - Credit Suisse Yaron Werber - Cowen https://seekingalpha.com/article/4393512-regeneron-pharmaceuticals-inc-s-regn-management-presents-investor-event-ash-2020-conference 1/29 12/5/21, 10:…	0
614	203.pdf	Stitch Fix, Inc. (NASDAQ:SFIX) Q1 2021 Earnings Conference Call December 7, 2020 5:00 PM ET	David Pearce - Vice President of Investor Relations Katrina Lake - Founder and Chief Executive Officer Elizabeth Spaulding - President Mike Smith - President and Chief Operating Officer Conference Call Participants Ross Sandler - Barclays https://seekingalpha.com/article/4393507-stitch-fix-inc-sfix-ceo-katrina-lake-on-q1-2021-results-earnings-call-transcript 1/32 12/5/21, 10:54 AM Stitch Fix, Inc…	1
615	204.pdf	MedMen Enterprises Inc. (OTCQB:MMNFF) Q1 2021 Results Earnings Conference Call December 7, 2020 5:00 PM ET	Tom Lynch - Chief Executive Officer Tim Bossidy - Chief Operating Officer Conference Call Participants Vivien Azer - Cowen Scott Fortune - ROTH Capital Partners https://seekingalpha.com/article/4393501-medmen-enterprises-inc-s-mmnff-ceo-tom-lynch-on-q1-2021-results-earnings-call-transcript 1/16 12/5/21, 10:54 AM MedMen Enterprises Inc.'s (MMNFF) CEO Tom Lynch on Q1 2021 Results - Earnings Call Tr…	1
616	205.pdf	ServiceNow, Inc. (NYSE:NOW) UBS Global TMT Virtual Conference Call December 7, 2020 3:45 PM ET	Karl Keirstead Well, good afternoon everybody. Thanks for joining this virtual fireside chat with ServiceNow at the 2020 UBS TMT Conference. With us today are Lara Caimi, the Chief Customer and Partner Officer; and I think you all as well know, Darren Yip, the Head of IR. In terms of format, we’ll keep it to 35, 40 minutes. In terms of questions, happy to take them. You all have access to a quest…	0
617	206.pdf	Groupon, Inc. (NASDAQ:GRPN) UBS Global TMT Conference December 7, 2020 3:45 PM ET	Okay. And here we are for our next fireside chat. Thanks, everyone, for coming back to our next session. It's my pleasure to host Aaron Cooper, Interim CEO of Groupon, for a fireside chat about all things that are going on with the company. This would be my last apology of the day. I promise for those who've heard this all day, but we do apologize for all the audio and video issues we've had in t…	0
618	207.pdf	Smartsheet Inc. (NYSE:SMAR) Q3 2021 Earnings Conference Call December 7, 2020 4:30 PM ET	Aaron Turner - Head of Investor Relations Mark Mader - Chief Executive Officer Pete Godbole - Incoming CFO Jennifer Ceran - Chief Financial Officer Gene Farrell - Chief Product Officer Conference Call Participants https://seekingalpha.com/article/4393494-smartsheet-inc-smar-ceo-mark-mader-on-q3-2021-results-earnings-call-transcript 1/29 12/5/21, 10:57 AM Smartsheet Inc. (SMAR) CEO Mark Mader on Q…	0
619	208.pdf	Splunk Inc. (NASDAQ:SPLK) Raymond James Technology Investors Conference December 7, 2020 3:20 PM ET	Company Participants Doug Merritt - President and Chief Executive Officer Jason Child - Senior Vice President and Chief Financial Officer Ken Tinsley - Investor Relations Katie White - Investor Relations Conference Call Participants Robert Majek - Raymond James https://seekingalpha.com/article/4393493-splunk-inc-s-splk-ceo-doug-merritt-presents-raymond-james-technology-investors-conference 1/20 1…	0
620	209.pdf	Arista Networks, Inc. (NYSE:ANET) UBS Global TMT Virtual Conference Call December 7, 2020 4:40 PM ET	Jayshree Ullal - President and Chief Executive Officer Good afternoon, everyone, and thank you for joining us this afternoon at the UBS Global TMT Conference. My name is David Vogt, the Enterprise Hardware and Networking Analyst at UBS. And we are pleased to have with us today Jayshree Ullal, President and CEO of Arista. Jayshree, thank you for joining us today and hosting a keynote address at ou…	0
621	21.pdf	Steelcase Inc. (NYSE:SCS) Q3 2021 Earnings Conference Call December 18, 2020 8:30 AM ET	Mike O'Meara - Director, Investor Relations Jim Keane - President & Chief Executive Officer Dave Sylvester - Senior Vice President & Chief Financial Officer Conference Call Participants Steven Ramsey - Thompson Research Group Reuben Garner - Benchmark https://seekingalpha.com/article/4395395-steelcase-inc-scs-ceo-jim-keane-on-q3-2021-results-earnings-call-transcript 1/28 12/4/21, 7:42 PM Steelcas…	0
622	210.pdf	Alteryx, Inc. (NYSE:AYX) Raymond James Technology Investors Conference December 7, 2020 2:20 PM ET	Mark Anderson Good afternoon, folks. Mark Anderson and Kevin Rubin here. Robert Majeck Yes. Thanks, Mark and Kevin. So, everyone, welcome back. I’m Robert Majeck, infrastructure software analyst at Raymond James. We’re about halfway through day one of our tech conference and excited to be here with the management team of https://seekingalpha.com/article/4393489-alteryx-inc-s-ayx-ceo-mark-anderson…	0
623	211.pdf	Coupa Software Incorporated (NASDAQ:COUP) Q3 2021 Earnings Conference Call December 7, 2020 4:30 PM ET	Chris Merwin - Goldman Sachs Stan Zlotsky - Morgan Stanley Nicholas Ivan Negulic - Truist Securities Alex Zukin - RBC Capital Markets Michael Burg - Mizuho Securities https://seekingalpha.com/article/4393488-coupa-software-incorporated-coup-ceo-rob-bernshteyn-on-q3-2021-results-earnings-call 1/31 12/5/21, 11:01 AM Coupa Software Incorporated (COUP) CEO Rob Bernshteyn on Q3 2021 Results - Earnings…	0
624	212.pdf	Zscaler, Inc. (NASDAQ:ZS) UBS Global TMT Conference December 7, 2020 2:50 PM ET	Jay Chaudhry - CEO Remo Canessa - CFO Conference Call Participants Fatima Boolani - UBS Fatima Boolani https://seekingalpha.com/article/4393473-zscaler-inc-zs-ceo-jay-chaudhry-presents-ubs-global-tmt-conference-transcript 1/22 12/5/21, 9:30 PM Zscaler, Inc. (ZS) CEO Jay Chaudhry Presents at UBS Global TMT Conference (Transcript) _ Seeking Alpha Good afternoon, everyone. Thank you for joining us o…	0
625	213.pdf	Intel Corporation (NASDAQ:INTC) UBS Global TMT Conference Call December 7, 2020 3:45 PM ET	Tim Arcuri Good afternoon. Thank you for joining us. I'm Tim Arcuri. I'm the semiconductor analyst here at UBS, and very happy to have Intel for this session. With Intel, we have Gregory Bryant, who is the Executive Vice President of the Client Computing Group, CCG at Intel, almost half of the revenue, pretty much half of the revenue of the company. https://seekingalpha.com/article/4393468-intel-…	0
626	214.pdf	HealthEquity, Inc. (NASDAQ:HQY) Q3 2021 Earnings Conference Call December 7, 2020 4:30 PM ET	Richard Putnam - Investor Relations Jon Kessler - President & Chief Executive Officer Steve Neeleman - Vice Chair & Founder Tyson Murdock - Executive Vice President & Deputy Chief Financial Officer Darcy Mott - Executive Vice President & Chief Financial Officer Ted Bloomberg - Executive Vice President & Chief Operating Officer https://seekingalpha.com/article/4393467-healthequity-inc-hqy-ceo-jon-…	0
627	215.pdf	DLH Holdings Corp. (NASDAQ:DLHC) Q4 2020 Earnings Conference Call December 7, 2020 11:00 AM ET	Chris Witty - Investor Relations Zach Parker - President and Chief Executive Officer Kathryn JohnBull - Chief Financial Officer Conference Call Participants Joe Gomes - NOBLE Capital Operator https://seekingalpha.com/article/4393459-dlh-holdings-corp-s-dlhc-ceo-zach-parker-on-q4-2020-results-earnings-call-transcript 1/16 12/5/21, 9:33 PM DLH Holdings Corp.'s (DLHC) CEO Zach Parker on Q4 2020 Resu…	0
628	216.pdf	DocuSign, Inc. (NASDAQ:DOCU) UBS Global TMT Virtual Conference December 7, 2020 12:05 PM ET	Company Participants Annie Leschin - Head of Investor Relations Dan Springer - Chief Executive Officer Cynthia Gaylor - Chief Financial Officer Conference Call Participants Karl Keirstead - UBS Karl Keirstead https://seekingalpha.com/article/4393452-docusign-inc-s-docu-ceo-dan-springer-on-ubs-global-tmt-virtual-conference-earnings-call 1/20 12/5/21, 9:34 PM DocuSign, Inc.'s (DOCU) CEO Dan Springe…	0
629	217.pdf	Sarepta Therapeutics, Inc. (NASDAQ:SRPT) MOMENTUM Multiple-Ascending Dose Study of SRP-5051 for Duchenne Muscular Dystrophy Conference Call December 7, 2020 8:30 AM ET	Conference Call Participants Salveen Richter - Goldman Sachs Tazeen Ahmad - Bank of America Gena Wang - Barclays Alethia Young - Cantor https://seekingalpha.com/article/4393449-sarepta-therapeutics-inc-srpt-ceo-doug-ingram-on-momentum-multiple-ascending-dose-study-of 1/34 12/5/21, 9:35 PM Sarepta Therapeutics, Inc. (SRPT) CEO Doug Ingram on MOMENTUM Multiple-Ascending Dose Study of SRP-5051 for D…	0
630	218.pdf	Dell Technologies Inc. (NYSE:DELL) UBS Global TMT Virtual Conference December 7, 2020 12:05 PM ET	Good afternoon, everyone, and thank you for joining us today at the UBS Global TMT Conference. My name is David Vogt. I'm the enterprise hardware and networking analyst here at UBS. And with me today, I'm excited to have from Dell Technologies, Matt Baker. Matt is the Senior Vice President of Strategy and Planning for Dell EMC. Matt -- just a little bit about Matt's background. He leads the devel…	0
631	219.pdf	Take-Two Interactive Software, Inc. (NASDAQ:TTWO) UBS Global TMT Virtual Conference December 7, 2020 11:10 AM ET	Good morning everyone, and thanks for joining our next session here at the UBS Global TMT Conference. I want to apologize and thank everyone for their patience today and we've had a lot of issues with the webcast and the video. So as a result of those issues, we're going to conduct this as a audio webcast of the conversation that Strauss Zelnick and I will have about Take-Two interactive. Hopeful…	0
632	22.pdf	TuanChe Limited (NASDAQ:TC) Q3 2020 Earnings Conference Call December 18, 2020 7:30 AM ET	Chenxi Yu - Deputy Chief Financial Officer Conference Call Participants Jack Vander Aarde - Maxim Group Operator https://seekingalpha.com/article/4395389-tuanche-limited-tc-ceo-wei-wen-on-q3-2020-results-earnings-call-transcript 1/11 12/4/21, 7:43 PM TuanChe Limited (TC) CEO Wei Wen on Q3 2020 Results - Earnings Call Transcript _ Seeking Alpha Good morning and good evening, ladies and gentlemen. …	0
633	220.pdf	NVIDIA Corporation (NASDAQ:NVDA) UBS Global TMT Virtual Conference December 7, 2020 11:10 AM ET	Good morning. Hi, this is Tim Arcuri. I'm the semiconductor analyst here at UBS. And we are very happy to -- in our next session to have NVIDIA. And with NVIDIA, very happy to have Colette Kress, who is the CFO. Hoping we can be back in New York next year. There is nothing better than New York during the holidays, so -- in more normal times anyway. So thank you, Colette. Thank you for being here.…	0
634	221.pdf	American Tower Corporation (NYSE:AMT) UBS Global TMT Conference Call December 7, 2020 12:05 PM ET	Okay. Thank you everyone for dialing in for our next session with American Tower. We have Rod Smith, Chief Financial Officer and Treasurer of American Tower. I’m going to moderate the questions. And if you have any questions on your side, please email them to me, and I will pass them along. Rod, thank you so much for joining us today. Rod Smith https://seekingalpha.com/article/4393408-american-to…	1
635	222.pdf	JinkoSolar Holding Co., Ltd. (NYSE:JKS) Q3 2020 Results Earnings Conference Call December 7, 2020 7:30 AM ET	Kangping Chen - CEO Charlie Cao - CFO Gener Miao - CMO Conference Call Participants Philip Shen - Roth Capital Partners https://seekingalpha.com/article/4393388-jinkosolar-holding-co-ltd-jks-ceo-kangping-chen-on-q3-2020-results-earnings-call-transcript 1/22 12/5/21, 9:43 PM JinkoSolar Holding Co., Ltd. (JKS) CEO Kangping Chen on Q3 2020 Results - Earnings Call Transcript _ Seeking Alpha Gary Zhou…	0
636	223.pdf	LightInTheBox Holding Co., Ltd. (NYSE:LITB) Q3 2020 Earnings Conference Call December 7, 2020 8:00 AM ET	Operator Good morning, everyone, and welcome to the Third Quarter 2020 Earnings Conference Call for LightInTheBox Holding Company, Ltd. Today's conference is being recorded. At this time, I would like to turn the call over to Mr. Tip Fleming for opening remarks and introductions. Please go ahead, sir. Tip Fleming https://seekingalpha.com/article/4393377-lightinthebox-holding-co-ltd-s-litb-ceo-jia…	0
637	224.pdf	Huazhu Group Limited (NASDAQ:HTHT) Q3 2020 Earnings Conference Call December 6, 2020 8:00 PM ET	Ji Qi - CEO Liu Xinxin - President Conference Call Participants Justin Kwok - Goldman Sachs https://seekingalpha.com/article/4393332-huazhu-group-limited-htht-ceo-ji-qi-on-q3-2020-results-earnings-call-transcript 1/19 12/5/21, 9:49 PM Huazhu Group Limited (HTHT) CEO Ji Qi on Q3 2020 Results - Earnings Call Transcript _ Seeking Alpha Billy Ng - Bank of America Lina Yan - HSBC Operator Ladies and g…	0
638	225.pdf	Afya Limited (NASDAQ:AFYA) Q3 2020 Results Conference Call December 4, 2020 10:00 AM ET	Virgilio Gibbon - Chief Executive Officer Luis Andre Blanco - Chief Financial Officer Conference Call Participants Marcelo Santos - JP Morgan Julio de Angeli - Vice President of Innovation and Continuing Medical Education https://seekingalpha.com/article/4393144-afya-limited-afya-ceo-virgilio-gibbon-on-q3-2020-results-earnings-call-transcript 1/19 12/5/21, 9:50 PM Afya Limited (AFYA) CEO Virgilio…	0
639	226.pdf	Moderna, Inc. (NASDAQ:MRNA) NASDAQ 43rd Virtual Investor Conference Call December 4, 2020 12:00 PM ET	Okay. I think we are live. So great. So thanks everybody for joining us for the next presentation. Very pleased to have Stéphane Bancel, who is the CEO of Moderna. I just need to read a quick disclaimer statement. So for important disclosures, please see Morgan Stanley research disclosure website at morganstanley.com/researchdisclosures and if you have any questions, please reach out to your Morg…	1
640	227.pdf	Culp, Inc. (NYSE:CULP) Q2 2021 Earnings Conference Call December 4, 2020 11:00 AM ET	Dru Anderson - IR Iv Culp - CEO Ken Bowling - CFO Boyd Chumbley - President, Upholstery Fabrics Business Conference Call Participants Bobby Griffin - Raymond James Marco Rodriguez - Stonegate Capital Markets O https://seekingalpha.com/article/4393139-culp-inc-culp-ceo-iv-culp-on-q2-2021-results-earnings-call-transcript 1/18 12/5/21, 9:51 PM Operator Culp, Inc. (CULP) CEO Iv Culp on Q2 2021 Result…	0
641	228.pdf	Ford Motor Company (NYSE:F) Goldman Sachs Global Automotive Conference December 4, 2020 8:00 AM ET	Great, my name is Mark Delaney and I cover the U.S. Auto and Industrial Tech sector at Goldman Sachs and I’m very excited to be hosting Hau Thai-Tang, who is the Chief Product Platform and Operations Officer at Ford. He has more than 25 years of experience in areas including product design, engineering and purchasing for Ford. So I think we'll learn a lot today from the discussion. With us today,…	0
642	229.pdf	Laurentian Bank of Canada (OTCPK:LRCDF) Q4 2020 Earnings Conference Call December 4, 2020 9:00 AM ET	Conference Call Participants Meny Grauman - Scotiabank Gabriel Dechaine - National Bank Financial Darko Mihelic - RBC Capital Markets Doug Young - Desjardins Capital Markets https://seekingalpha.com/article/4393053-laurentian-bank-of-canada-lrcdf-ceo-rania-llewellyn-on-q4-2020-results-earnings-call 1/21 12/5/21, 9:56 PM Laurentian Bank of Canada (LRCDF) CEO Rania Llewellyn on Q4 2020 Results - Ea…	0
643	23.pdf	Apogee Enterprises, Inc. (NASDAQ:APOG) Q3 2021 Earnings Conference Call December 18, 2020 9:00 AM ET	Jeff Huebschen - VP, IR & Communications Joe Puishys - CEO, President & Director Nisheet Gupta - EVP & CFO Conference Call Participants Chris Moore - CJS Securities Brent Thielman - DA Davidson https://seekingalpha.com/article/4395379-apogee-enterprises-inc-apog-ceo-joe-puishys-on-q3-2021-results-earnings-call-transcript 1/22 12/4/21, 7:44 PM Apogee Enterprises, Inc. (APOG) CEO Joe Puishys on Q3 …	1
644	230.pdf	CSX Corp (NASDAQ:CSX) Credit Suisse Global Industrials Conference December 3, 2020 10:50 AM ET	All right. Good morning, everybody. Next up, we have CSX, very happy to have Kevin Boone, who's the CFO here with us today. Lots obviously going on in the news this week and a cyclical volume recovery underway. So Kevin, I don't know if you have any opening comments or remarks or I can just start hitting you with questions? Kevin Boone No. I appreciate you having me. It feels full circle. This wa…	0
645	231.pdf	B.O.S. Better Online Solutions Ltd. (NASDAQ:BOSC) Q3 2020 Earnings Conference Call November 30, 2020 10:00 AM ET	Operator Ladies and gentlemen, thank you for standing by. Welcome to the BOS Third Quarter 2020 Results Conference Call. All participants are present in a listen-only mode. Following management’s formal presentation, instructions will be given for the question- and-answer session. [Operator Instructions] As a reminder, this conference call is being recorded and will be available on the BOS websit…	0
646	232.pdf	Can-Fite BioPharma Ltd. (NYSE:CANF) Q3 2020 Earnings Conference Call November 30, 2020 9:15 AM ET	Motti Farbstein - Chief Financial Officer Conference Call Participants Peter Levine - Ameriprise Operator https://seekingalpha.com/article/4392058-can-fite-biopharma-ltd-canf-ceo-pnina-fishman-on-q3-2020-results-earnings-call-transcript 1/10 12/5/21, 10:01 PM Can-Fite BioPharma Ltd. (CANF) CEO Pnina Fishman on Q3 2020 Results - Earnings Call Transcript _ Seeking Alpha Greetings, and welcome to th…	0
647	233.pdf	Canaan Inc. (NASDAQ:CAN) Q3 2020 Results Earnings Conference Call November 30, 2020 7:00 AM ET	Conference Call Participants Zheng Jialiang - HashKey Capital Operator Ladies and gentlemen, thank you for standing by, and welcome to Canaan’s Inc. Third Quarter 2020 Earnings Call. At this time, all participants are in a listen-only mode. After the management's prepared remarks, we will have a question-and-answer session. https://seekingalpha.com/article/4392045-canaan-inc-s-can-ceo-nangeng-zha…	0
648	234.pdf	MOGU Inc. (NYSE:MOGU) Q2 2021 Earnings Conference Call November 30, 2020 6:30 AM ET	Charlie Chen - China Renaissance Locky Lau - A.J. Asset Management Veronica Shen - China Renaissance Operator Ladies and gentlemen, thank you for standing by, and welcome to MOGU's Second Quarter Fiscal Year 2021 Financial Results At this time all participants are in a listen- https://seekingalpha.com/article/4392039-mogu-inc-s-mogu-ceo-qi-chen-on-q2-2021-results-earnings-call-transcript 1/13 12/…	0
649	235.pdf	Jiayin Group Inc. (NASDAQ:JFIN) Q3 2020 Earnings Conference Call November 30, 2020 8:00 AM ET	Shelley Bai - Director, Investor Relations Chunlin Fan - Chief Financial Officer Xu Yifang - Director and Chief Risk Officer Conference Call Participants https://seekingalpha.com/article/4392012-jiayin-group-inc-jfin-ceo-dinggui-yan-on-q3-2020-results-earnings-call-transcript 1/10 Operator Julia Qian services. 12/5/21, 10:01 PM Jiayin Group Inc. (JFIN) CEO Dinggui Yan on Q3 2020 Results - Earning…	0
650	236.pdf	Xinyuan Real Estate Co., Ltd. (NYSE:XIN) Q3 2020 Earnings Conference Call November 27, 2020 8:00 AM ET	Steven Ralston - Zacks Operator Good day, ladies and gentlemen, and thank you for standing by. Welcome to the Xinyuan Real Estate Company Third Quarter 2020 Earnings Conference Call. Currently, all participants are in a listen-only mode. Later, we will conduct a question-and-answer session and instructions will follow at that time. As a reminder, we are recording today's call. If you have any obj…	0
651	237.pdf	LAIX Inc. (NYSE:LAIX) Q3 2020 Earnings Conference Call November 26, 2020 8:00 PM ET	Elsie Sheng - Morgan Stanley Operator Hello, ladies and gentlemen. Thank you for standing by for LAIX Incorporated Third Quarter 2020 Earnings Conference Call. At this time, all participants are in a listen-only mode. After management's prepared remarks, there will be a question-and-answer session. Today's conference call is being recorded. I will now turn the call over to your host, Mr. Harry He…	0
652	238.pdf	Aviva plc (OTCPK:AIVAF) Q3 2020 Earnings Conference Call November 26, 2020 3:00 AM ET	James Shuck - Citigroup Oliver Steel - Deutsche Bank Blair Stewart - Bank of America Andrew Crean - Autonomous Farooq Hanif - Credit Suisse https://seekingalpha.com/article/4391720-aviva-plc-aivaf-ceo-amanda-blanc-on-q3-2020-results-earnings-call-transcript 1/24 12/5/21, 10:02 PM Aviva plc (AIVAF) CEO Amanda Blanc on Q3 2020 Results - Earnings Call Transcript _ Seeking Alpha Greig Patterson - KBW…	0
653	239.pdf	Elekta AB (OTCPK:EKTAF) Q2 2021 Results Conference Call November 26, 2020 4:00 AM ET	Annette Lykke - Handelsbanken Michael Jungling - Morgan Stanley Veronika Dubajova - Goldman Sachs Kit Lee - Jefferies Kristofer Liljeberg - Carnegie https://seekingalpha.com/article/4391719-elekta-ab-ektaf-ceo-gustaf-salford-on-q2-2021-results-earnings-call-transcript 1/25 12/5/21, 10:02 PM Elekta AB (EKTAF) CEO Gustaf Salford on Q2 2021 Results - Earnings Call Transcript _ Seeking Alpha Sten Gus…	0
654	24.pdf	BlackBerry Limited (NYSE:BB) Q3 2021 Results Earnings Conference Call December 17, 2020 5:30 PM ET	Tim Foote - Investor Relations John Chen - Executive Chair and CEO Steve Rai - Chief Financial Officer Conference Call Participants Daniel Chan - TD Securities Mike Walkley - Canaccord Genuity https://seekingalpha.com/article/4395300-blackberry-limiteds-bb-ceo-john-chen-on-q3-2021-results-earnings-call-transcript 1/24 12/4/21, 7:44 PM BlackBerry Limited's (BB) CEO John Chen on Q3 2021 Results - E…	0
655	240.pdf	Alpha Bank A.E. (OTCPK:ALBKY) Nine Months 2020 Earnings Conference Call November 26, 2020 10:50 AM ET	Alex Boulougouris - Wood & Co Osman Memisoglu - Ambrosia Capital Operator Ladies and gentlemen, thank you for standing by. I am Gaily, your Chorus Call operator. Welcome and thank you for joining the Alpha Bank Conference Call to present and https://seekingalpha.com/article/4391717-alpha-bank-e-albky-ceo-vassilios-psaltis-on-nine-months-2020-results-earnings-call-transcript 1/21 12/5/21, 10:02 PM…	0
656	241.pdf	Public Joint-Stock Company Federal Hydro-Generating Company RusHydro (OTCQX:RSHYY) Q3 2020 Earnings Conference Call November 26, 2020 8:00 AM ET	Conference Call Participants Sergey Garamita - Raiffeisen Bank Sergey Beiden - Renaissance Capital Fedor Kornachev - Sberbank CIB Investment Research Roman Filkin - Prosperity Capital Management https://seekingalpha.com/article/4391716-public-joint-stock-company-federal-hydro-generating-company-rushydro-rshyy-ceo-andrey 1/18 12/5/21, 10:03 PM Public Joint-Stock Company Federal Hydro-Generating Co…	0
657	242.pdf	Rémy Cointreau SA (OTCPK:REMYF) Q2 2021 Earnings Conference Call November 26, 2020 3:00 AM ET	Laurence Whyatt - Barclays Bank PLC Simon Hales - Citigroup Global Markets Ltd. Trevor Stirling - Sanford C. Bernstein & Co., LLC Richard Withagen - Kepler Cheuvreux Edward Mundy - Jefferies LLC https://seekingalpha.com/article/4391715-r-cointreau-sa-remyf-ceo-eric-vallat-on-q2-2021-results-earnings-call-transcript 1/37 12/5/21, 10:03 PM Rémy Cointreau SA (REMYF) CEO Éric Vallat on Q2 2021 Result…	0
658	243.pdf	BioSyent Inc. (OTCPK:BIOYF) Q3 2020 Earnings Conference Call November 26, 2020 7:00 AM ET	presentation with a look at our sales, EBITDA and net income after tax for the quarter ended September 30th. walk you through. So as you can see, our sales were just short of $5.8 million, and that was 7% below the year ago quarter. So that's made up of a couple of different elements that I just want to https://seekingalpha.com/article/4391710-biosyent-inc-bioyf-ceo-rene-goehrum-on-q3-2020-result…	0
659	244.pdf	Yunji Inc. (NASDAQ:YJ) Q3 2020 Earnings Conference Call November 26, 2020 7:00 AM ET	Good morning, and good evening, ladies and gentlemen. Thank you, and welcome to Yunji's Third Quarter 2020 Earnings Conference Call. With us today are Mr. Shanglue Xiao, Chairman and Chief Executive Officer; Mr. Chen Chen, Chief Financial Officer; Mr. Hui Ma, Chief Strategy Officer and Chief People Officer; Mr. Chengqi Zhang, Vice President of Finance; and Ms. Kaye Liu, Investor Relations Directo…	0
660	245.pdf	Thai Beverage Public Company Limited (OTCPK:TBVPF) Q4 2020 Earnings Conference Call November 26, 2020 5:30 AM ET	Good evening everyone. Thank you for joining the Thai Beverage FY 2020 results call. All participants have been placed in listen-only mode. Later, we will conduct a question- and-answer session and instruction will be given at that time. I will now hand over the call to the presenter, Ms. Namfon Aungsutornrungsi, Thai Bev's Head of Investor Relations and the Member of Thai Bev's senior management…	0
661	246.pdf	Thai Beverage Public Company Limited (OTCPK:TBVPF) Q4 2020 Earnings Conference Call November 26, 2020 5:30 AM ET	Good evening everyone. Thank you for joining the Thai Beverage FY 2020 results call. All participants have been placed in listen-only mode. Later, we will conduct a question- and-answer session and instruction will be given at that time. I will now hand over the call to the presenter, Ms. Namfon Aungsutornrungsi, Thai Bev's Head of Investor Relations and the Member of Thai Bev's senior management…	0
662	247.pdf	Ithaca Energy Inc. (OTCPK:IACAF) Q3 2020 Results Earnings Conference Call November 26, 2020 7:00 AM ET	Ladies and gentlemen, welcome to today’s Ithaca Energy Q3, 2020 Financial Results Call. My name is Jordan, and I will be co-ordinating your call today. Questions should be submitted via email to Rhona MacInnes, the Corporate Affairs Directors at rmacinnes@itacaenergy.com. I’m now going to hand over to Bill Dunnet to begin. Bill Dunnet Thank you. Just to introduce myself. I’m Bill Dunnet, CEO. And…	0
663	248.pdf	Rogers Sugar Inc. (OTCPK:RSGUF) Q4 2020 Results Conference Call November 25, 2020 5:30 PM ET	Stephen MacLeod - BMO Michael Van Aelst - TD Securities Endri Leno - National Bank Operator https://seekingalpha.com/article/4391619-rogers-sugar-inc-rsguf-ceo-john-holliday-on-q4-2020-results-earnings-call-transcript 1/20 12/5/21, 10:05 PM Rogers Sugar Inc. (RSGUF) CEO John Holliday on Q4 2020 Results - Earnings Call Transcript _ Seeking Alpha Good afternoon, ladies and gentlemen, and welcome to…	0
664	249.pdf	China Biologic Products Holdings, Inc. (NASDAQ:CBPO) Q3 2020 Earnings Conference Call November 25, 2020 7:30 AM ET	Jason Liu - Credit Suisse Stephanie Hanna - Dealreporter Operator Good day and welcome to the China Biologic Products Third Quarter 2020 Earnings Conference Call. [Operator Instructions] Please note this event is being recorded. I would now like to turn the conference over to Mr. Philip Lisio. Please go ahead. https://seekingalpha.com/article/4391617-china-biologic-products-holdings-inc-cbpo-ceo-…	0
665	25.pdf	RF Industries, Ltd. (NASDAQ:RFIL) Q4 2020 Earnings Conference Call December 17, 2020 4:30 PM ET	Aman Gulani - B. Riley FBR Hal Granger - Great Quarter Research Josh Nichols - B. Riley FBR Operator Greetings, and welcome to the RF Industries Fourth Quarter and Fiscal 2020 Financial Results Conference Call At this time all participants are in a listen-only mode A https://seekingalpha.com/article/4395293-rf-industries-ltd-rfil-ceo-rob-dawson-on-q4-2020-results-earnings-call-transcript 1/33 12/…	0
666	250.pdf	CD PROJEKT S.A. (OTCPK:OTGLF) Q3 020 Earnings Conference Call November 25, 2020 12:00 PM ET	Ken Rumph - Jefferies Vladimir Bespalov - VTB Capital Matilde Durazzano - Barclays Robert Berg - Berenberg https://seekingalpha.com/article/4391610-cd-projekt-s-otglf-ceo-adam-kicinski-on-q3-2020-results-earnings-call-transcript 1/23 12/5/21, 10:05 PM CD PROJEKT S.A. (OTGLF) CEO Adam Kiciński on Q3 2020 Results - Earnings Call Transcript _ Seeking Alpha Matti Littunen - Bernstein Operator Please …	0
667	26.pdf	AAR Corp. (NYSE:AIR) Q2 2021 Earnings Conference Call December 17, 2020 4:45 PM ET	Sean Gillen - VP & CFO Conference Call Participants Robert Spingarn - Crédit Suisse Joseph DeNardi - Stifel, Nicolaus & Company Ken Herbert - Canaccord Genuity https://seekingalpha.com/article/4395290-aar-corp-s-air-ceo-john-holmes-on-q2-2021-results-earnings-call-transcript 1/18 12/4/21, 7:46 PM AAR Corp.'s (AIR) CEO John Holmes on Q2 2021 Results - Earnings Call Transcript _ Seeking Alpha Micha…	0
668	27.pdf	FedEx Corp. (NYSE:FDX) Q2 2021 Results Conference Call December 17, 2020 5:30 PM ET	Fred Smith - Chairman and CEO Raj Subramaniam - President and COO Mike Lenz - EVP and CFO Mark Allen - EVP, General Counsel and Secretary Rob Carter - EVP, FedEx Information Services and CIO https://seekingalpha.com/article/4395288-fedex-corp-s-fdx-ceo-fred-smith-on-q2-2021-results-earnings-call-transcript 1/33 12/4/21, 7:47 PM FedEx Corp.'s (FDX) CEO Fred Smith on Q2 2021 Results - Earnings Call…	0
669	28.pdf	Applied DNA Sciences, Inc. (NASDAQ:APDN) Q4 2020 Earnings Conference Call December 17, 2020 4:30 PM ET	Corporate Participants Sanjay Hurry - Executive Director of Investor Relations and Corporate Communications James Hayward - Chairman, President and Chief Executive Officer Beth Jantzen - Chief Financial Officer Conference Call Participants Yi Chen - H.C. Wainwright Anthony Vendetti - Maxim Group https://seekingalpha.com/article/4395287-applied-dna-sciences-inc-s-apdn-ceo-james-hayward-on-q4-2020-…	1
670	29.pdf	Scholastic Corporation (NASDAQ:SCHL) Q2 2021 Earnings Conference Call December 17, 2020 4:30 PM ET	Gil Dickoff - Senior Vice President, Treasurer and Head of Investor Relations Richard Robinson - Chairman, President and Chief Executive Officer Kenneth Cleary - Chief Financial Officer Conference Call Participants Andrew Crum - Stifel, Nicolaus & Company, Inc. Operator https://seekingalpha.com/article/4395284-scholastic-corporation-schl-ceo-richard-robinson-on-q2-2021-results-earnings-call-trans…	1
671	3.pdf	Secoo Holding Limited (NASDAQ:SECO) Q3 2020 Results Earnings Conference Call December 28, 2020 8:00 AM ET	Operator Hello, ladies and gentlemen. Thank you for standing by for Secoo Holding Limited’s Third Quarter 2020 Earnings Conference Call. At this time, all participants are in a listen-only mode. After management’s prepared remarks, there will be a question-and- answer session. Today’s conference call is being recorded. I will now turn the call over to your host, Ms. Jingbo Ma, Board Secretary of …	1
672	30.pdf	Fiore Gold Ltd. (OTCQB:FIOGF) Q4 2020 Results Earnings Conference Call December 17, 2020 2:00 PM ET	Hello and good afternoon. We hope that you are well and thank you for joining us today for this webinar on Fiore Gold Ltd. My name is Jacob Willoughby. I am the Vice President of Research and Analyst at Red Cloud Securities Inc. Joining me remotely today is Tim Warman, CEO of Fiore Gold. We will begin today's webinar with a presentation on the company by Tim, followed by a question-and-answer per…	1
673	31.pdf	Worthington Industries, Inc. (NYSE:WOR) Q2 2021 Earnings Conference Call December 17, 2020 2:00 PM ET	Seth Rosenfeld - Exane BNP Phil Gibbs - KeyBanc John Tumazos - John Tumazos Independent Operator Good afternoon and welcome to the Worthington Industries Second Quarter Fiscal 2021 Earnings Conference Call All participants will be able to listen-only until the question- https://seekingalpha.com/article/4395276-worthington-industries-inc-wor-ceo-andy-rose-on-q2-2021-results-earnings-call-transcrip…	0
674	32.pdf	Worthington Industries, Inc. (NYSE:WOR) Q2 2021 Earnings Conference Call December 17, 2020 2:00 PM ET	Seth Rosenfeld - Exane BNP Phil Gibbs - KeyBanc John Tumazos - John Tumazos Independent Operator Good afternoon and welcome to the Worthington Industries Second Quarter Fiscal 2021 Earnings Conference Call All participants will be able to listen-only until the question- https://seekingalpha.com/article/4395276-worthington-industries-inc-wor-ceo-andy-rose-on-q2-2021-results-earnings-call-transcrip…	0
675	33.pdf	Sanderson Farms, Inc. (NASDAQ:SAFM) Q4 2020 Earnings Conference Call December 17, 2020 11:00 AM ET	Mike Cockrell - Treasurer, CFO & Chief Legal Officer Lampkin Butts - President Conference Call Participants Ken Goldman - JPMorgan Peter Galbo - Bank of America https://seekingalpha.com/article/4395264-sanderson-farms-inc-s-safm-ceo-joe-sanderson-on-q4-2020-results-earnings-call-transcript 1/27 12/4/21, 7:50 PM Sanderson Farms, Inc.'s (SAFM) CEO Joe Sanderson on Q4 2020 Results - Earnings Call Tr…	1
676	34.pdf	Lennar Corporation (NYSE:LEN) Q4 2020 Earnings Conference Call December 17, 2020 11:00 AM ET	Stuart Miller - Executive Chair Diane Bessette - CFO Dave Collins - Controller Rick Beckwitt - Co-CEO Jon Jaffe - Co-CEO Bruce Gross - CEO, Lennar Financial Services C f C https://seekingalpha.com/article/4395262-lennar-corporation-len-q4-2020-results-earnings-call-transcript 1/29 12/4/21, 7:50 PM Lennar Corporation (LEN) Q4 2020 Results - Earnings Call Transcript _ Seeking Alpha Conference Call …	1
677	35.pdf	ABM Industries Incorporated (NYSE:ABM) Q4 2020 Results Earnings Conference Call December 17, 2020 8:30 AM ET	Susie Kim - Vice President, Investor Relations and Treasurer Scott Salmirs - President and CEO Earl Ellis - Executive Vice President and CFO Conference Call Participants Andrew Wittmann - Baird Sean Eastman - KeyBanc Capital Markets https://seekingalpha.com/article/4395258-abm-industries-incorporateds-abm-ceo-scott-salmirs-on-q4-2020-results-earnings-call 1/31 12/4/21, 7:51 PM ABM Industries Inco…	0
678	36.pdf	Jabil Inc. (NYSE:JBL) Q1 2021 Earnings Conference Call December 17, 2020 8:30 AM ET	Adam Berry - VP, IR Mark Mondello - CEO Mike Dastoor - CFO Conference Call Participants Adam Tindle - Raymond James Jim Suva - Citigroup Investment Research https://seekingalpha.com/article/4395245-jabil-inc-s-jbl-ceo-mark-mondello-on-q1-2021-results-earnings-call-transcript 1/27 12/4/21, 7:51 PM Jabil Inc.'s (JBL) CEO Mark Mondello on Q1 2021 Results - Earnings Call Transcript _ Seeking Alpha Ru…	1
679	37.pdf	CalAmp Corp. (NASDAQ:CAMP) Q3 2021 Earnings Conference Call December 17, 2020 8:30 AM ET	Jeff Gardner - President & Chief Executive Officer Kurt Binder - Executive Vice President & Chief Financial Officer Conference Call Participants Scott Searle - ROTH Capital Partners Mike Latimore - Northland Capital Markets https://seekingalpha.com/article/4395232-calamp-corp-camp-ceo-jeff-gardner-on-q3-2021-results-earnings-call-transcript 1/22 12/4/21, 7:52 PM CalAmp Corp. (CAMP) CEO Jeff Gardn…	0
680	38.pdf	Rite Aid Corporation (NYSE:RAD) Q3 2021 Earnings Conference Call December 17, 2020 8:30 AM ET	Trent Kruse - VP of IR and Treasury Heyward Donigan - CEO Jim Peters - COO Dan Robson - President, EnvisionRxOptions Matt Schroeder - CFO Conference Call Participants https://seekingalpha.com/article/4395214-rite-aid-corporation-rad-ceo-heyward-donigan-on-q3-2021-results-earnings-call-transcript 1/32 12/4/21, 7:52 PM Rite Aid Corporation (RAD) CEO Heyward Donigan on Q3 2021 Results - Earnings Cal…	0
681	39.pdf	ADDvantage Technologies Group, Inc. (NASDAQ:AEY) Q4 2020 Earnings Conference Call December 17, 2020 9:00 AM ET	Conference Call Participants Operator Thank you for standing by. This is the conference operator. Welcome to the ADDvantage Technologies Fiscal 2020 Fourth Quarter Financial Results Conference Call. As a reminder, all participants are in a listen-only mode and the conference is being recorded. After the presentation, there will be an opportunity to ask questions. [Operator Instructions] https://s…	1
682	4.pdf	CSP Inc. (NASDAQ:CSPI) Q4 2020 Earnings Conference Call December 28, 2020 10:00 AM ET	Joseph Nerges - Segren Investments Operator Good day, everyone. And welcome to the CSP Inc. Fiscal 2020 Fourth Quarter Conference Call. At this time, all participants are in a listen-only mode. Later, you will have the opportunity to ask questions. Please note this call is being recorded. And now, it is my pleasure to turn the conference over to Mr. Michael Polyviou. Please https://seekingalpha.c…	1
683	40.pdf	Accenture plc (NYSE:ACN) Q1 2021 Earnings Conference Call December 17, 2020 8:00 AM ET	Angie Park - MD & Head, IR Julie Sweet - CEO & Director KC McClure - CFO Conference Call Participants Lisa Ellis - MoffettNathanson Tien-Tsin Huang - JPMorgan Chase & Co. https://seekingalpha.com/article/4395192-accenture-plcs-acn-ceo-julie-sweet-on-q1-2021-results-earnings-call-transcript 1/26 12/4/21, 7:53 PM Accenture plc's (ACN) CEO Julie Sweet on Q1 2021 Results - Earnings Call Transcript _ …	1
684	41.pdf	Uxin Limited (NASDAQ:UXIN) Q2 2021 Earnings Conference Call December 17, 2020 Play Earnings Call	Operator Ladies and gentlemen, thank you for standing by and welcome to Uxin’s Earnings Conference Call for the Quarter Ended September 30, 2020. And at this time, all participants are in listen-only mode. And after management’s prepared remarks, there will be a Q&A session. Today’s conference call is being recorded. If you have any objections, you may disconnect at this time. I would now like to…	0
685	42.pdf	Washington Prime Group Inc. (WPG) Special Meeting of Shareholders December 17, 2020 10:00 AM ET	Shareholders. To begin the meeting, I will turn it over to Robert Demchak, Executive Vice President, General Counsel and Corporate Secretary of Washington Prime Group. You may now proceed. Robert Demchak Good morning. During today's virtual special meeting of shareholders, we can make certain forward-looking statements as defined by the federal securities laws. These statements relate to expectat…	1
686	43.pdf	Herman Miller, Inc. (MLHR) Q2 2021 Earnings Conference Call December 17, 2020 9:30 AM ET	Kevin Veltman - VP of Investor Relations and Treasurer Andi Owen - President and CEO Jeff Stutz - CFO John Michael - President of North America Contract Debbie Propst - President from Herman Miller Retail Ben Groom - Chief Digital Officer https://seekingalpha.com/article/4395171-herman-miller-inc-s-mlhr-ceo-andi-owen-on-q2-2021-results-earnings-call-transcript 1/7 12/4/21, 7:54 PM Herman Miller, …	0
687	44.pdf	General Mills, Inc. (NYSE:GIS) Q2 2021 Earnings Conference Call December 17, 2020 9:00 AM ET	Jeff Siemon - Vice President, Investor Relations Jeff Harmening - Chairman & Chief Executive Officer Kofi Bruce - Chief Financial Officer Jon Nudi - President, North America Retail Conference Call Participants Ken Goldman - JPMorgan https://seekingalpha.com/article/4395170-general-mills-inc-s-gis-ceo-jeff-harmening-on-q2-2021-results-earnings-call-transcript 1/31 12/4/21, 7:55 PM General Mills, I…	1
688	45.pdf	Qutoutiao Inc. (NASDAQ:QTT) Q3 2020 Earnings Conference Call December 16, 2020 8:00 PM ET	Operator Eric Tan - Co founder, Chairman and Chief Executive Officer Hello, ladies and gentlemen, thank you for standing by for the Third Quarter 2020 Earnings Conference Call for the Qutoutiao, Inc. At this time, all participants will be in a listen-only mode. After management’s remarks, there will be a question-and-answer session. Today's conference call is being recorded. https://seekingalpha.…	1
689	46.pdf	Blue Bird Corporation (NASDAQ:BLBD) Q4 2020 Results Conference Call December 16, 2020 4:30 PM ET	Company Participants Mark Benfield - Head of Profitability and Investor Relations Phil Horlock - President and Chief Executive Officer Jeff Taylor - Chief Financial Officer Conference Call Participants Eric Stine - Craig-Hallum Craig Irwin - ROTH Capital Partners https://seekingalpha.com/article/4395089-blue-bird-corporations-blbd-ceo-phil-horlock-on-q4-2020-results-earnings-call-transcript 1/23 …	1
690	47.pdf	Cummins Inc. (NYSE:CMI) BofA Securities 2020 Hydrogen Conference Call December 16, 2020 3:15 PM ET	Julien Dumoulin-Smith - Bank of America Merrill Lynch Steve Byrne - Bank of America Merrill Lynch Ross Gilardi https://seekingalpha.com/article/4395080-cummins-inc-s-cmi-management-presents-bofa-securities-2020-hydrogen-conference-transcript 1/18 12/4/21, 7:57 PM Cummins Inc.'s (CMI) Management Presents at BofA Securities 2020 Hydrogen Conference (Transcript) _ Seeking Alpha Good afternoon, every…	1
691	48.pdf	The Toro Company (NYSE:TTC) Q4 2020 Earnings Conference Call December 16, 2020 11:00 AM ET	Nicholas Rhoads - Managing Director, Investor Relations Rick Olson - Chairman and Chief Executive Officer Renee Peterson - Vice President, Treasurer and Chief Financial Officer Conference Call Participants Mike Shlisky - Colliers Securities Tim Wojs - Robert W. Baird https://seekingalpha.com/article/4395074-toro-company-ttc-ceo-rick-olson-on-q4-2020-results-earnings-call-transcript 1/24 12/4/21, …	1
692	49.pdf	Centogene N.V. (NASDAQ:CNTG) Q3 2020 Earnings Conference Call December 16, 2020 8:30 AM ET	Richard Stoffelen - Chief Financial Officer Andrin Oswald - Chief Executive Officer Conference Call Participants Puneet Souda - SVB Leerink Sung Ji Nam - BTIG https://seekingalpha.com/article/4395058-centogene-n-v-cntg-ceo-andrin-oswald-on-q3-2020-results-earnings-call-transcript 1/26 12/4/21, 7:57 PM Centogene N.V. (CNTG) CEO Andrin Oswald on Q3 2020 Results - Earnings Call Transcript _ Seeking …	0
693	5.pdf	Paychex, Inc. (NASDAQ:PAYX) Q2 2021 Earnings Conference Call December 23, 2020 9:30 AM ET	Martin Mucci - President and Chief Executive Officer Efrain Rivera - Chief Financial Officer Conference Call Participants Ramsey El-Assal - Barclays Kevin McVeigh - Credit Suisse Jason Kupferberg - Bank of America https://seekingalpha.com/article/4396059-paychex-inc-s-payx-ceo-martin-mucci-on-q2-2021-results-earnings-call-transcript 1/47 12/4/21, 7:36 PM Paychex, Inc.'s (PAYX) CEO Martin Mucci On…	0
694	50.pdf	American Outdoor Brands, Inc. (NASDAQ:AOUT) Q2 2021 Earnings Conference Call December 15, 2020 5:00 PM ET	John Kernan - Cowen Scott Stember - CL King James Hardiman - Wedbush Operator https://seekingalpha.com/article/4395031-american-outdoor-brands-inc-aout-ceo-brian-murphy-on-q2-2021-results-earnings-call-transcript 1/25 12/4/21, 7:58 PM American Outdoor Brands, Inc. (AOUT) CEO Brian Murphy on Q2 2021 Results - Earnings Call Transcript _ Seeking Alpha Good day, everyone, and welcome to American Outd…	0
695	51.pdf	Nordson Corporation (NASDAQ:NDSN) Q4 2020 Earnings Conference Call December 16, 2020 8:30 AM ET	Sundaram Nagarajan - President and CEO Joe Kelley - EVP and CFO Conference Call Participants Allison Poliniak - Wells Fargo Matt Summerville - D.A. Davidson https://seekingalpha.com/article/4395014-nordson-corporation-ndsn-ceo-sundaram-nagarajan-on-q4-2020-results-earnings-call-transcript 1/29 12/4/21, 7:58 PM Nordson Corporation (NDSN) CEO Sundaram Nagarajan on Q4 2020 Results - Earnings Call Tr…	0
696	52.pdf	Aspen Group, Inc. (NASDAQ:ASPU) Q2 2021 Earnings Conference Call December 15, 2020 4:30 PM ET	Frank Cotroneo - Chief Financial Officer Conference Call Participants Darren Aftahi - ROTH Capital Partners Mike Grondahl - Northland Securities Eric Martinuzzi - Lake Street https://seekingalpha.com/article/4394935-aspen-group-inc-s-aspu-ceo-michael-mathews-on-q2-2021-results-earnings-call-transcript 1/28 12/4/21, 7:59 PM Aspen Group, Inc.'s (ASPU) CEO Michael Mathews on Q2 2021 Results - Earnin…	1
697	53.pdf	Good Times Restaurants Inc. (NASDAQ:GTIM) Q4 2020 Earnings Conference Call December 15, 2020 5:00 PM ET	website. Good afternoon, ladies and gentlemen. Welcome to the Good Times Restaurants Inc. Fiscal 2020 Fourth Quarter Earnings Call. By now, everyone should have access to the company’s earnings release, which is available in the Investors section of the company’s https://seekingalpha.com/article/4394933-good-times-restaurants-inc-gtim-ceo-ryan-zink-on-q4-2020-results-earnings-call-transcript 1/10…	0
698	54.pdf	Eli Lilly and Company (NYSE:LLY) Q3 2020 Earnings Conference Call December 15, 2020 8:30 AM ET	Anne White - President of Lilly Oncology Mike Mason - President of Lilly Diabetes Jacob Van Naarden - Chief Operating Officer Loxo Oncology at Lilly Ilya Yuffa - President of Lilly Bio-Medicines Conference Call Participants https://seekingalpha.com/article/4394929-eli-lilly-and-companys-lly-ceo-dave-ricks-on-2021-guidance-update-results-earnings-call 1/43 12/4/21, 8:00 PM Eli Lilly and Company's …	1
699	55.pdf	T-Mobile US, Inc. (NASDAQ:TMUS) Oppenheimer 5G Summit Conference Call December 15, 2020 11:30 AM ET	Good morning, everybody. Tim Horan back again for our last session of the morning before we get a little bit of a lunch break. My pleasure to have Neville Ray here who is the President of Technology for T-Mobile. I've kind of seen Neville’s work for over 20 years here, and I think almost anyone in the industry, and I would say this for sure, Neville is probably the best wireless engineer in the w…	0
700	56.pdf	CooTek (Cayman) Inc. (NYSE:CTK) Q3 2020 Earnings Conference Call December 15, 2020 8:00 AM ET Company Partici	Hunter Diamond - Diamond Equity Research Chen Jiuhong - Haitong Securities Co., Ltd. Nelson Cheung - Citigroup Aaron Ju - Tigress Financial Partners Operator Good day, and welcome to CooTek’s Third Quarter 2020 Unaudited Financial Results Conference Call All participants will be in listen-only mode [Operator Instructions] After https://seekingalpha.com/article/4394895-cootek-cayman-inc-ctk-q3-202…	1
701	57.pdf	American International Group, Inc. (NYSE:AIG) UBS Virtual Specialty Insurance/Reinsurance Conference Call December 15, 2020 1:00 PM ET	Conference Call Participants Brian Meredith - UBS Brian Meredith Good afternoon, everybody. This is Brian Meredith. I'm the North America Insurance Analyst here at UBS, and welcome to our next fireside chat here with AIG. Quick introduction here, who we have with us. First, we've got, Chris Schaper, who is the CEO https://seekingalpha.com/article/4394893-american-international-group-inc-aig-manag…	0
702	58.pdf	AT&T Inc. (NYSE:T) Oppenheimer 5G Summit December 15, 2020 9:50 AM ET	Oppenheimer. My pleasure to be hosting our first 5G Summit of what will hopefully be many. And we have Igal Elbaz from – the Senior VP from Wireless and Access Technology from AT&T. I'm sure I’ve screwed that up. But thanks so much Igal for joining us. I appreciate the time. I know it's a really, really, really incredibly busy time for you. But I know investors are just kind of dying for an updat…	0
703	59.pdf	Ceconomy AG (OTCPK:MTAGF) Q4 2020 Earnings Conference Call December 15, 2020 4:00 AM ET	Conference Call Participants Volker Bosse - Baader Bank Nicolas Langlet - Exane BNP Paribas Lorenzo Margiotta - Bank of America Merrill Lynch Fabienne Caron - Kepler https://seekingalpha.com/article/4394858-ceconomy-ags-mtagf-ceo-bernhard-duttmann-on-q4-2020-results-earnings-call-transcript 1/47 12/4/21, 8:02 PM Ceconomy AG's (MTAGF) CEO Bernhard Düttmann on Q4 2020 Results - Earnings Call Transc…	0
704	6.pdf	cbdMD, Inc. (NYSE:YCBD) Q4 2020 Earnings Conference Call December 22, 2020 4:15 PM ET	Ronan Kennedy - CFO Marty Sumichrast - Chairman and Co-CEO Ken Cohn - Chief Marketing Officer Conference Call Participants Paul Cooney - Joseph Gunnar Michael Galantino - Chapin Davis https://seekingalpha.com/article/4395886-cbdmd-inc-s-ycbd-ceo-marty-sumichrast-on-q4-2020-results-earnings-call-transcript 1/15 12/4/21, 7:36 PM cbdMD, Inc.'s (YCBD) CEO Marty Sumichrast on Q4 2020 Results - Earning…	0
705	60.pdf	Butler National Corporation (OTCQB:BUKS) Q2 2021 Earnings Conference Call December 15, 2020 11:00 AM ET	Sam Rebotsky - SER Asset Management Operator Good morning, ladies and gentlemen. Today is Tuesday, December 15th, and welcome to the Butler National Corporation Second Quarter Fiscal 2021 Financial Results Conference Call. At this time, all participants are in a listen-only mode. After the presentation, we will conduct a question-and-answer session. Your call leaders for today's call are David Dr…	1
706	61.pdf	Fire & Flower Holdings Corp. (OTCQX:FFLWF) Q3 2020 Earnings Conference Call December 15, 2020 8:30 AM ET	Andrew Semple - Echelon Wealth partners Justin Keywood - Stifel GMP Endri Leno - National Bank Financial Operator https://seekingalpha.com/article/4394790-fire-and-flower-holdings-corp-s-fflwf-ceo-trevor-fencott-on-q3-2020-results-earnings-call 1/31 12/4/21, 8:03 PM Fire & Flower Holdings Corp.'s (FFLWF) CEO Trevor Fencott on Q3 2020 Results - Earnings Call Transcript _ Seeking Alpha Good morning…	0
707	62.pdf	AstraZeneca PLC (NASDAQ:AZN) AstraZeneca to acquire Alexion Conference Call December 12, 2020 9:00 AM ET	Ludwig Hantson - CEO, Alexion Aradhana Sarin - EVP & CFO, Alexion Conference Call Participants James Gordon - JPMorgan Andrew Baum - Citigroup https://seekingalpha.com/article/4394784-astrazeneca-plc-azn-astrazeneca-to-acquire-alexion-conference-call-transcript 1/37 12/4/21, 8:04 PM AstraZeneca PLC (AZN) AstraZeneca to acquire Alexion Conference Call (Transcript) _ Seeking Alpha Emmanuel Papadaki…	0
708	63.pdf	MamaMancini's Holdings, Inc. (NASDAQ:MMMB) Q3 2021 Earnings Conference Call December 15, 2020 4:30 PM ET	Carl Wolf - Chairman and Chief Executive Officer Larry Morgenstein - Chief Financial Officer Matthew Brown - President and Chief Operating Officer Conference Call Participants Howard Halpern - Taglich Brothers https://seekingalpha.com/article/4394710-mamamancinis-holdings-inc-mmmb-ceo-carl-wolf-on-q3-2021-results-earnings-call-transcript 1/15 12/4/21, 8:05 PM MamaMancini's Holdings, Inc. (MMMB) C…	1
709	64.pdf	Transat A.T. Inc. (OTCPK:TRZBF) Q4 2020 Earnings Conference Call December 14, 2020 10:30 AM ET	Conference Call Participants Jean-François Lavoie - Desjardins Securities Kevin Chiang - CIBC World Markets Konark Gupta - Scotiabank Mona Nazir - Laurentian Bank https://seekingalpha.com/article/4394692-transat-t-inc-s-trzbf-ceo-jean-marc-eustache-on-q4-2020-results-earnings-call-transcript 1/23 12/4/21, 8:05 PM Transat A.T. Inc.'s (TRZBF) CEO Jean-Marc Eustache on Q4 2020 Results - Earnings Cal…	0
710	65.pdf	HEXO Corp. (NASDAQ:HEXO) Q1 2021 Earnings Conference Call December 14, 2020 8:30 AM ET	Conference Call Participants Tamy Chen - BMO Capital Markets Aaron Grey - Alliance Global Partners Rupesh Parikh - Oppenheimer Co. Inc. https://seekingalpha.com/article/4394674-hexo-corp-s-hexo-ceo-sebastien-st-louis-on-q1-2021-results-earnings-call-transcript 1/29 12/4/21, 8:06 PM HEXO Corp.'s (HEXO) CEO Sebastien St-Louis on Q1 2021 Results - Earnings Call Transcript _ Seeking Alpha John Zampar…	0
711	66.pdf	Next Green Wave Holdings Inc. (OTCQX:NXGWF) Q3 2020 Earnings Conference Call December 11, 2020 5:00 PM ET	Monita Faris I’d like to take a moment to welcome those who have attended our Next Green Wave Corporate Update. Mike Jennings, who is our CEO, Director and Founder, will be giving a presentation today. We're going to start off with Matthew Jewell, who is our CFO. If you could just hold on a few moments, we're just going to give some other participants a few moments to log in as well and we’ll pic…	0
712	67.pdf	Construction Partners, Inc. (NASDAQ:ROAD) Q4 2020 Earnings Conference Call December 11, 2020 10:00 AM ET	Rick Black - Investor Relations Charles Owens - Chief Executive Officer Jule Smith - Chief Operating Officer Alan Palmer - Chief Financial Officer Ned Fleming - Executive Chairman Conference Call Participants https://seekingalpha.com/article/4394306-construction-partners-inc-road-ceo-charles-owens-on-q4-2020-results-earnings-call-transcript 1/22 12/4/21, 8:07 PM Construction Partners, Inc. (ROAD)…	0
713	68.pdf	Johnson Outdoors Inc. (NASDAQ:JOUT) Q4 2020 Results Earnings Conference Call December 11, 2020 11:00 AM ET	Company Participants Helen Johnson-Leipold - Chairman and CEO David Johnson - Vice President and CFO Conference Call Participants Anthony Lebiedzinski - Sidoti & Company Operator https://seekingalpha.com/article/4394289-johnson-outdoors-inc-s-jout-ceo-helen-johnson-leipold-on-q4-2020-results-earnings-call 1/10 12/4/21, 8:08 PM Johnson Outdoors Inc.'s (JOUT) CEO Helen Johnson-Leipold on Q4 2020 Re…	0
714	69.pdf	Quanex Building Products Corporation (NYSE:NX) Q4 2020 Earnings Conference Call December 11, 2020 11:00 AM ET	George Wilson - President & Chief Executive Officer Conference Call Participants Daniel Moore - CJS Securities Julio Romero - Sidoti & Company Reuben Garner - Benchmark Company https://seekingalpha.com/article/4394285-quanex-building-products-corporation-nx-ceo-george-wilson-on-q4-2020-results-earnings-call 1/27 12/4/21, 8:08 PM Quanex Building Products Corporation (NX) CEO George Wilson on Q4 20…	0
715	7.pdf	Cintas Corporation (NASDAQ:CTAS) Q2 2021 Earnings Conference Call December 22, 2020 10:00 AM ET	Scott Farmer - Chairman of the Board and Chief Executive Officer Todd Schneider - Executive Vice President and Chief Operating Officer Mike Hansen - Executive Vice President and Chief Financial Officer Conference Call Participants Andrew Steinerman - J.P. Morgan https://seekingalpha.com/article/4395870-cintas-corporation-ctas-ceo-scott-farmer-on-q2-2021-results-earnings-call-transcript 1/32 12/4/…	0
716	70.pdf	Medtronic plc (NYSE:MDT) 2020 Annual Meeting Conference Call December 11, 2020 10:00 AM ET	Good morning, ladies and gentlemen. And welcome to Medtronic plc’s 2020 Annual General Meeting. At this time, I will turn the call over to Geoff Martha, Chairman and Chief Executive Officer of the Company. Geoff Martha Hey. Good morning, afternoon or evening, depending on where you are located around the world. I’m Geoff Martha, the Chairman and Chief Executive Officer of the Company. And I will …	0
717	71.pdf	Major Drilling Group International Inc. (OTCPK:MJDLF) Q2 2021 Earnings Conference Call December 11, 2020 9:00 AM ET	Maggie MacDougall - Stifel Daryl Young - TD Securities Ryan Hanley - Laurentian Bank Ahmad Shaath - Beacon Securities Operator https://seekingalpha.com/article/4394278-major-drilling-group-international-inc-mjdlf-ceo-denis-larocque-on-q2-2021-results-earnings 1/15 12/4/21, 8:09 PM Major Drilling Group International Inc. (MJDLF) CEO Denis Larocque on Q2 2021 Results - Earnings Call Transcript _ Se…	0
718	72.pdf	Carl Zeiss Meditec AG (OTCPK:CZMWF) Q4 2020 Earnings Conference Call December 11, 2020 3:30 AM ET	Falko Friedrichs - Deutsche Bank Scott Bardo - Berenberg Markus Gola - Stifel Europe Aliaksandr Halitsa - Hauck & Aufhäuser Scott Bardo - Berenberg https://seekingalpha.com/article/4394275-carl-zeiss-meditec-ag-czmwf-ceo-ludwin-monz-on-q4-2020-results-earnings-call-transcript 1/22 12/4/21, 8:10 PM Carl Zeiss Meditec AG (CZMWF) CEO Ludwin Monz on Q4 2020 Results - Earnings Call Transcript _ Seekin…	0
719	73.pdf	Academy Sports and Outdoors, Inc. (NASDAQ:ASO) Q3 2020 Earnings Conference Call December 10, 2020 11:00 AM ET	Conference Call Participants Robert Holmes - Bank of America Securities Seth Sigman - Credit Suisse John Zolidis - Quo Vadis Capital Chris Horvers - JP Morgan https://seekingalpha.com/article/4394219-academy-sports-and-outdoors-inc-aso-ceo-ken-hicks-on-q3-2020-results-earnings-call-transcript 1/29 12/4/21, 8:10 PM Academy Sports and Outdoors, Inc. (ASO) CEO Ken Hicks on Q3 2020 Results - Earnings…	0
720	74.pdf	Dave & Buster's Entertainment, Inc. (NASDAQ:PLAY) Q3 2020 Earnings Conference Call December 10, 2020 5:00 PM ET	Brian Jenkins - Chief Executive Officer Margo Manning - Chief Operating Officer Conference Call Participants Jake Bartlett - Truist Securities Jeff Farmer - Gordon Haskett https://seekingalpha.com/article/4394199-dave-and-busters-entertainment-inc-play-ceo-brian-jenkins-on-q3-2020-results-earnings-call 1/36 12/4/21, 8:11 PM Dave & Buster's Entertainment, Inc. (PLAY) CEO Brian Jenkins on Q3 2020 R…	1
721	75.pdf	Costco Wholesale Corporation (NASDAQ:COST) Q1 2021 Earnings Conference Call December 10, 2020 5:00 PM ET	Conference Call Participants Simeon Gutman - Morgan Stanley Mike Baker - D.A. Davidson Chuck Grom - Gordon Haskett Michael Lasser - UBS https://seekingalpha.com/article/4394181-costco-wholesale-corporation-cost-on-q1-2021-results-earnings-call-transcript 1/33 12/4/21, 8:12 PM Costco Wholesale Corporation (COST) On Q1 2021 Results - Earnings Call Transcript _ Seeking Alpha Scot Ciccarelli - RBC Ca…	0
722	76.pdf	SeaChange International, Inc. (NASDAQ:SEAC) Q3 2021 Earnings Conference Call December 10, 2020 5:00 PM ET	Yossi Aloni - Chief Executive Officer Michael Prinn - Chief Financial Officer Marek Kielczewski - Chief Technology Officer Chad Hassler - Chief Commercial Officer Conference Call Participants Steven Frankel - Colliers https://seekingalpha.com/article/4394179-seachange-international-inc-seac-ceo-yossi-aloni-on-q3-2021-results-earnings-call-transcript 1/16 12/4/21, 8:12 PM SeaChange International, …	0
723	77.pdf	MediaAlpha, Inc. (NYSE:MAX) Q3 2020 Earnings Conference Call December 10, 2020 5:00 PM ET	Daniel Grossman - Citi Michael Graham - Canaccord Genuity Operator https://seekingalpha.com/article/4394175-mediaalpha-inc-max-ceo-steve-yi-on-q3-2020-results-earnings-call-transcript 1/12 12/4/21, 8:13 PM MediaAlpha, Inc. (MAX) CEO Steve Yi on Q3 2020 Results - Earnings Call Transcript _ Seeking Alpha Ladies and gentlemen, thanks for standing by and welcome to the MediaAlpha Third Quarter 2020 E…	1
724	78.pdf	Vail Resorts, Inc. (NYSE:MTN) Q1 2021 Earnings Conference Call December 10, 2020 5:00 PM ET	Michael Barkin - CFO Conference Call Participants Felicia Hendrix - Barclays Shaun Kelley - Bank of America Chris Woronka - Deutsche Bank https://seekingalpha.com/article/4394174-vail-resorts-inc-mtn-ceo-rob-katz-on-q1-2021-results-earnings-call-transcript 1/27 12/4/21, 8:13 PM Vail Resorts, Inc. (MTN) CEO Rob Katz on Q1 2021 Results - Earnings Call Transcript _ Seeking Alpha Patrick Scholes - Tr…	0
725	79.pdf	Lakeland Industries, Inc. (NASDAQ:LAKE) Q3 2021 Results Earnings Conference Call December 10, 2020 4:30 PM ET	Allen Dillard - Chief Financial Officer Conference Call Participants Gerry Sweeney - ROTH Capital Alex Fuhrman - Craig-Hallum Capital Group Operator https://seekingalpha.com/article/4394172-lakeland-industries-inc-s-lake-ceo-charles-roberson-on-q3-2021-results-earnings-call 1/22 12/4/21, 8:14 PM Lakeland Industries, Inc.'s (LAKE) CEO Charles Roberson on Q3 2021 Results - Earnings Call Transcript …	0
726	8.pdf	CarMax, Inc. (NYSE:KMX) Q3 2021 Earnings Conference Call December 22, 2020 9:00 AM ET	Bill Nash - President and Chief Executive Officer Tom Reedy - Executive Vice President, Finance Jon Daniels - Senior Vice President, CAF Conference Call Participants Scot Ciccarelli - RBC Capital Markets Enrique Mayor-Mora - Senior Vice President and Chief Financial Officer https://seekingalpha.com/article/4395869-carmax-inc-kmx-ceo-bill-nash-on-q3-2021-results-earnings-call-transcript 1/31 12/4/…	0
727	80.pdf	lululemon athletica inc. (NASDAQ:LULU) Q3 2020 Earnings Conference Call December 10, 2020 4:30 PM ET	Calvin McDonald - Chief Executive Officer Meghan Frank - Chief Financial Officer Conference Call Participants Mark Altschwager - Robert W. Baird Celeste Burgoyne - President, Americas and Global Guest Innovation https://seekingalpha.com/article/4394171-lululemon-athletica-inc-lulu-ceo-calvin-mcdonald-on-q3-2020-results-earnings-call-transcript 1/29 12/4/21, 8:14 PM lululemon athletica inc. (LULU)…	1
728	81.pdf	Transcontinental Inc. (OTCPK:TCLAF) Q4 2020 Results Earnings Conference Call December 10, 2020 4:15 PM ET	Adam Shine - National Bank Financial Mark Neville - Scotiabank Paul Bilenki - TD Securities Drew McReynolds - RBC David McFadgen - Cormark Securities https://seekingalpha.com/article/4394170-transcontinental-inc-tclaf-ceo-francois-olivier-on-q4-2020-results-earnings-call-transcript 1/22 12/4/21, 8:14 PM Transcontinental Inc. (TCLAF) CEO François Olivier on Q4 2020 Results - Earnings Call Transcri…	0
729	82.pdf	PHX Minerals Inc. (NYSE:PHX) Q4 2020 Earnings Conference Call December 10, 2020 5:00 PM ET	Chad Stephens - President and Chief Executive Officer Freda Webb - Vice President, Mineral Operations Conference Call Participants Derek Whitfield - Stifel Jeff Grampp - Northland. https://seekingalpha.com/article/4394168-phx-minerals-inc-phx-ceo-chad-stephens-on-q4-2020-results-earnings-call-transcript 1/12 12/4/21, 8:15 PM PHX Minerals Inc. (PHX) CEO Chad Stephens on Q4 2020 Results - Earnings …	0
730	83.pdf	Oracle Corp (NYSE:ORCL) Q2 2021 Earnings Conference Call December 10, 2020 5:00 PM ET	Lawrence Ellison - Co-Founder, Chairman & CTO Safra Catz - CEO & Director Conference Call Participants Heather Bellini - Goldman Sachs Group Brad Zelnick - Crédit Suisse https://seekingalpha.com/article/4394167-oracle-corp-orcl-ceo-safra-catz-on-q2-2021-results-earnings-call-transcript 1/16 12/4/21, 8:15 PM Oracle Corp (ORCL) CEO Safra Catz on Q2 2021 Results - Earnings Call Transcript _ Seeking …	0
731	84.pdf	Broadcom Inc. (NASDAQ:AVGO) Q4 2020 Earnings Conference Call December 10, 2020 5:00 PM ET	Hock Tan - President and CEO Charlie Kawwas - COO Kirsten Spears - CFO Conference Call Participants Tom Krause - President, Infrastructure Software Group https://seekingalpha.com/article/4394165-broadcom-inc-avgo-ceo-hock-tan-on-q4-2020-results-earnings-call-transcript 1/21 12/4/21, 8:16 PM Broadcom Inc. (AVGO) CEO Hock Tan on Q4 2020 Results - Earnings Call Transcript _ Seeking Alpha Craig Hette…	0
732	85.pdf	Empire Company Limited (EMLAF) CEO Michael Medline on Q2 2021 Results - Earnings Call Transcript	Michael Vels - CFO Pierre St-Laurent - EVP and COO, Full Service Conference Call Participants Renato Basanta - Barclays Capital, Inc. Mark Petrie - CIBC Wealth Markets https://seekingalpha.com/article/4394162-empire-company-limited-emlaf-ceo-michael-medline-on-q2-2021-results-earnings-call-transcript 1/31 12/4/21, 8:17 PM Empire Company Limited (EMLAF) CEO Michael Medline on Q2 2021 Results - Ear…	0
733	86.pdf	Zedge, Inc. (NYSE:ZDGE) Q1 2021 Earnings Conference Call December 10, 2020 4:30 PM ET	Operator Good afternoon. Welcome to Zedge’s First Quarter 2021 Earnings Conference Call. During managements prepared remarks all participants will be in a listen-only mode. [Operator Instructions] In today's presentation, Jonathan Reich, Zedge’s Chief Executive Officer; and Yi Tsai, Zedge’s Chief Financial Officer will discuss Zedge’s financial and operational results for the three month period t…	0
734	87.pdf	Nanotech Security Corp. (OTCQX:NTSFF) Q4 2020 Earnings Conference Call December 10, 2020 5:00 PM ET	Operator Good afternoon. And thank you for joining us to discuss Nanotech Security Corp's Fourth Quarter and Fiscal 2020 Year End Results. On the call today, we have Troy Bullock, Nanotech's President and CEO; and Monika Russell, Nanotech's CFO. Please be advised that this call is being recorded. Currently, all participants are in a listen-only mode. Following the presentation, we will conduct a …	0
735	88.pdf	FireEye, Inc. (FEYE) Barclays Global Technology, Media and Telecommunications Conference December 10, 2020 2:00 PM ET	Saket Kalia - Barclays Saket Kalia Okay. Great. Well, hey, good afternoon or good morning, depending on which coast you're on. Welcome to the Barclays -- day two of the Barclays TMT Conference. My name is Saket Kalia. I cover software here at Barclays. Very happy to have with us the team from FireEye. We've got Kevin Mandia, Chief Executive Officer. We've got Frank Verdecanna, Chief Financial Off…	0
736	89.pdf	Palo Alto Networks, Inc. (NASDAQ:PANW) Barclays Global TMT Conference December 10, 2020 12:00 PM ET	Saket Kalia https://seekingalpha.com/article/4394141-palo-alto-networks-inc-panw-ceo-nikesh-arora-presents-barclays-global-tmt-conference 1/17 12/4/21, 8:19 PM Palo Alto Networks, Inc. (PANW) CEO Nikesh Arora Presents at Barclays Global TMT Conference (Transcript) _ Seeking Alpha Okay. Well, hey, good morning or good afternoon, depending on what coast you're on right now. Welcome to day two of th…	0
737	9.pdf	Ark Restaurants Corp (NASDAQ:ARKR) Q4 2020 Earnings Conference Call December 22, 2020 11:00 AM ET	Milan Mehta - Value Investment Principals Roger Lipton - Lipton Financial Services Bruce Geller - Geller Ventures Operator Greetings. Welcome to the Ark Restaurants' Fourth Quarter 2020 Results Conference Call At this time all participants are in a listen-only mode A question-and-answer https://seekingalpha.com/article/4395860-ark-restaurants-corp-arkr-ceo-michael-weinstein-on-q4-2020-results-ear…	1
738	90.pdf	Zscaler, Inc. (NASDAQ:ZS) Barclays Global Technology, Media and Telecommunications Conference 2020 December 10, 2020 1:00 PM ET	Conference Call Participants Saket Kalia - Barclays Jay Chaudhry Okay great. Well, hey good afternoon or good morning, depending on what cost you are on, and welcome to day two of the Barclays TMT conference. Very honored to have with us the team from Zscaler, we've got Jay Chaudhry, Co-Founder and Chief Executive https://seekingalpha.com/article/4394137-zscaler-inc-s-zs-ceo-jay-chaudhry-presents…	0
739	91.pdf	Western Digital Corporation (NASDAQ:WDC) Barclays Global TMT Conference December 10, 2020 1:30 PM ET	Tom O'Malley - Barclays Tom O'Malley Great, welcome back to the Barclays Global Virtual TMT Conference. I'm Tom O'Malley, for Midcap Semi and Semiconductor Capital Equipment Analyst here at Barclays. It's our pleasure to host Western Digital this afternoon. We have David Goeckeler, Chief Executive Officer; Robert Eulau, who's Executive Vice President and Chief Financial Officer; as well as Peter …	1
740	92.pdf	Applied Materials, Inc. (NASDAQ:AMAT) Barclays Global Technology, Media and Telecommunications Conference December 10, 2020 11:00 AM ET	Blayne Curtis analyst at Barclays. Dan Durn, CFO. Dan, welcome. Question-and-Answer Session All right. Thanks for joining. I'm Blayne Curtis, semiconductor and semi cap equipment Very happy to have Applied Materials as our next presenter from the company. We have https://seekingalpha.com/article/4394127-applied-materials-inc-amat-presents-barclays-global-technology-media-and-telecommunications 1/…	0
741	93.pdf	Splunk, Inc. (NASDAQ:SPLK) Barclays Global Technology, Media and Telecommunications Conference December 10, 2020 12:30 PM ET	Raimo Lenschow - Barclays Bank Raimo Lenschow Hey, welcome to our next session. I got Jason and Tim here from Splunk. We'll be doing the session in 2 parts. We'll first start with Jason, talk a little bit about the quarter. But I'm really happy to have Tim here as well to kind of make sure we talk a little bit product because a lot of stuff has happened over at Splunk over the last couple of year…	0
742	94.pdf	Ciena Corporation (NYSE:CIEN) Q4 2020 Earnings Conference Call December 10, 2020 8:30 AM ET	Gregg Lampf - Vice President of Investor Relations Gary Smith - President and Chief Executive Officer James Moylan - Senior Vice President of Finance and Chief Financial Officer Scott McFeely - Senior Vice President of Global Products and Services Conference Call Participants Rod Hall - Goldman Sachs Group, Inc. https://seekingalpha.com/article/4394125-ciena-corporation-cien-ceo-gary-smith-on-q4-…	0
743	95.pdf	Adobe Inc. (NASDAQ:ADBE) Q4 2020 Earnings Conference Call December 10, 2020 11:00 AM ET	Jonathan Vaas - Associate General Counsel and Vice President, Investor Relations Shantanu Narayen - Chairman, President and Chief Executive Officer Abhay Parasnis - Chief Technology Officer and Chief Product Officer, Document Cloud Scott Belsky - Chief Product Officer and Executive Vice President, Creative Cloud Anil Chakravarthy - Executive Vice President and General Manager, Digital Experience …	1
744	96.pdf	Hooker Furniture Corporation (NASDAQ:HOFT) Q3 2021 Earnings Conference Call December 10, 2020 9:00 AM ET	Paul Toms - Chairman and CEO Jeremy Hoff - President, Hooker Legacy Brands Lee Boone - President, Home Meridian Division Conference Call Participants Anthony Lebiedzinski - Sidoti & Company https://seekingalpha.com/article/4394106-hooker-furniture-corporation-hoft-ceo-paul-toms-on-q3-2021-results-earnings-call-transcript 1/21 12/4/21, 8:23 PM Hooker Furniture Corporation (HOFT) CEO Paul Toms on Q…	1
745	97.pdf	Greif, Inc. (NYSE:GEF) Q4 2020 Earnings Conference Call December 10, 2020 8:30 AM ET	Matt Eichmann - Vice President, Investor Relations and Corporate Communications Peter Watson - President and Chief Executive Officer Larry Hilsheimer - Executive Vice President and Chief Financial Officer ConferenceCall Participants George Staphos - Bank of America Merrill Lynch Adam Josephson - KeyBanc https://seekingalpha.com/article/4394099-greif-inc-gef-ceo-peter-watson-on-q4-2020-results-ear…	0
746	98.pdf	Corning, Inc. (NYSE:GLW) Barclays Global Technology, Media and Telecommunications Conference December 10, 2020 9:00 AM ET	Peter Zdebski - Barclays Bank Tim Long Hello, everybody. Tim Long here at Barclays along with Peter Zdebski and my team. We welcome you to the fireside chat with Corning. We're happy to have Tony Tripeny, CFO. Many of you know, with us, he's a longtime veteran at Corning. So we're really looking forward to his insights. https://seekingalpha.com/article/4394086-corning-inc-glw-presents-barclays-gl…	1
747	99.pdf	Innovative Solutions and Support, Inc. (NASDAQ:ISSC) Q4 2020 Results Conference Call December 10, 2020 10:00 AM ET	David Campbell - Thompson, Davis & Company Operator Welcome to the Innovative Solutions and Support Fourth Quarter 2020 Earnings Conference Call and Webcast. All participants will be in a listen-only mode. [Operator Instructions] After today's presentation, there will be an opportunity to ask questions. [Operator Instructions] Please note this event is being recorded. https://seekingalpha.com/art…	0
748	1.pdf	Super Micro Computer, Inc. (NASDAQ:SMCI) F3Q09 (Qtr End 03/31/09) Earnings Call Transcript April 29, 2009 5:00 PM ET	Analysts Alex Kurtz – Merriman Curhan Ford Michael Burns [ph] – Kennedy Capital Glenn Hanus – Needham & Company Operator https://seekingalpha.com/article/134292-super-micro-computer-inc-f3q09-qtr-end-03-31-09-earnings-call-transcript 1/20 12/4/21, 10:00 AM Operator Super Micro Computer, Inc. F3Q09 (Qtr End 03/31/09) Earnings Call Transcript _ Seeking Alpha Ladies and gentlemen, thank you for stan…	1
749	10.pdf	RTI Biologics Inc. (RTIX) Q1 2009 Earnings Call Transcript April 29, 2009 9:00 AM ET	Matt Dolan – Roth Capital Keay Nakae – Collins Stewart Bill Plovanic – Canaccord Adams Greg Brash – Sidoti & Company https://seekingalpha.com/article/134244-rti-biologics-inc-q1-2009-earnings-call-transcript 1/27 12/4/21, 10:08 AM RTI Biologics Inc. Q1 2009 Earnings Call Transcript _ Seeking Alpha Matt Menze – PearlDiver Technologies Jayson Bedford – Raymond James & Associates Brooks West – Craig…	0
750	100.pdf	Telefonaktiebolaget LM Ericsson (ERIC) Q1 2009 Earnings Call Transcript April 30, 2009 3:00 AM ET	Analysts David Halldén – HQ Bank Jan Ihrfelt – Swedbank Per Lindtorp – Erik Penser Fondkommission Martin Nilsson – Handelsbanken https://seekingalpha.com/article/134240-telefonaktiebolaget-lm-ericsson-q1-2009-earnings-call-transcript 1/18 12/4/21, 11:25 AM Martin Nilsson Handelsbanken Telefonaktiebolaget LM Ericsson Q1 2009 Earnings Call Transcript _ Seeking Alpha Mats Nyström – SEB Enskilda Henr…	1
751	11.pdf	Telefonaktiebolaget LM Ericsson (ERIC) Q1 2009 Earnings Call Transcript April 30, 2009 3:00 AM ET	Jan Ihrfelt – Swedbank Per Lindtorp – Erik Penser Fondkommission Martin Nilsson – Handelsbanken Mats Nyström – SEB Enskilda Henry Sténson Good morning, everyone. Welcome to the presentation of the Ericsson Quarterly Report for the First Quarter 2009. My name is Henry Sténson, I will be your moderator today, https://seekingalpha.com/article/134240-telefonaktiebolaget-lm-ericsson-q1-2009-earnings-c…	1
752	12.pdf	Semiconductor Manufacturing International Corporation (SMI) Q1 2009 Earnings Call Transcript April 29, 2009 8:30 PM ET	Randy Abrams – Credit Suisse Pranab Sharma – Daiwa Securities Steven Pelayo – HSBC Daniel Zu [ph] – Wuxi Research [ph] Donald Lu – Goldman Sachs Kichen [ph] Thai Capital Market [ph] https://seekingalpha.com/article/134124-semiconductor-manufacturing-international-corporation-q1-2009-earnings-call-transcript 1/22 12/4/21, 10:09 AM Semiconductor Manufacturing International Corporation Q1 2009 Earni…	0
753	13.pdf	Starbucks Corporation (NASDAQ:SBUX) F2Q09 Earnings Call April 29, 2009 5:00 PM ET	John Glass - Morgan Stanley Sharon Zackfia - William Blair & Company, LLC Steven Kron - Goldman Sachs David Palmer - UBS Investment Research Jeffery Bernstein - Barclays Capital Larry Miller - RBC Capital Markets John Ivankoe J P Morgan https://seekingalpha.com/article/134119-starbucks-corporation-f2q09-qtr-end-3-29-09-earnings-call-transcript 1/30 12/4/21, 10:10 AM Starbucks Corporation F2Q09 (Q…	1
754	14.pdf	Itron, Inc. (ITRI) Q1 2009 Earnings Call Transcript April 29, 2009 5:00 PM ET Executives	Steve Sanders – Stephens Inc. John Quealy – Canaccord Adams Stuart Bush – RBC Capital Markets Paul Coster – J.P. Morgan Chase, Inc. Carter Shoop – Deutsche Bank Mark Rogers – Gagnon Securities https://seekingalpha.com/article/134118-itron-inc-q1-2009-earnings-call-transcript 1/44 12/4/21, 10:10 AM Itron, Inc. Q1 2009 Earnings Call Transcript | Seeking Alpha Jeff Bronchick – RBC Investment Managem…	0
755	15.pdf	OSI Pharmaceuticals, Inc. (OSIP) Q1 2009 Earnings Call April 29, 2009 5:00 PM ET Kathy Galante - Senior Director of Investor and Public Relations of OSI Pharmaceuticals	Joel Sendek - Lazard & Co., Ltd Jessica Li - Goldman Sachs George Farmer - Canaccord Adams Maged Shenouda - UBS Jim Birchenough - Barclays Capital https://seekingalpha.com/article/134117-osi-pharmaceuticals-inc-q1-2009-earnings-call-transcript 1/22 12/4/21, 10:11 AM OSI Pharmaceuticals, Inc. Q1 2009 Earnings Call Transcript | Seeking Alpha Jason Zhang - BMO Howard Liang - Leerink Swann [Ziad Guth…	0
756	16.pdf	Evergreen Solar Inc. (ESLR) Q1 2009 Earnings Call April 30, 2009 5:00 PM ET Executives	Steve O'Rourke - Deutsche Bank Sanjay Shrestha - Lazard Capital Markets Vijay Singh - Janco partners Amar Zaman - UBS Nick Allen - Morgan Stanley Adam Krop - Ardour Capital https://seekingalpha.com/article/134467-evergreen-solar-inc-q1-2009-earnings-call-transcript 1/42 12/4/21, 10:15 AM Evergreen Solar Inc.Q1 2009 Earnings Call Transcript _ Seeking Alpha Sam Dubinsky - Oppenheimer Jeff Osborne -…	1
757	17.pdf	Tessera Technologies, Inc. (TSRA) Q1 2009 Earnings Call April 30, 2009 4:30 PM ET Executives	C. J. Muse - Barclays Capital Kevin Vassily - Pacific Crest Securities Raj Seth - Cowen & Company Michael Cowen - MDC Financial Research Operator Good afternoon. My name is Lemont; and I will be your conference operator today. At this time I would like to welcome everyone to the first quarter earnings conference call https://seekingalpha.com/article/134465-tessera-technologies-inc-q1-2009-earning…	1
758	18.pdf	CardioNet, Inc. (NASDAQ:BEAT) Q1 2009 Earnings Call April 30, 2009 5:00 PM ET Executives	Bob Hopkins - Banc of America-Merrill Lynch Rick Wise - Leerink Swann Matt Dolan - Roth Capital Alan Fishman - Thomas Weisel Partners Michael Hunt - Barclays Capital Milan Gupta - South Point Capital https://seekingalpha.com/article/134464-cardionet-inc-q1-2009-earnings-call-transcript 1/26 CardioNet, Inc. Q1 2009 Earnings Call Transcript | Seeking Alpha 12/4/21, 10:16 AM Operator Call. Good afte…	0
759	19.pdf	Liquidity Services, Inc. (NASDAQ:LQDT) F2Q09 (Qtr End 03/31/09) Earnings Call Transcript April 30, 2009 5:00 PM ET	Analysts Shawn Milne – Janney Montgomery Scott Sri Anantha – Oppenheimer Colin Sebastian – Lazard Capital Markets Stephen Ju – RBC Capital Markets https://seekingalpha.com/article/134463-liquidity-services-inc-f2q09-qtr-end-03-31-09-earnings-call-transcript 1/28 12/4/21, 10:17 AM Stephen Ju RBC Capital Markets Liquidity Services, Inc. F2Q09 (Qtr End 03/31/09) Earnings Call Transcript | Seeking Al…	0
760	2.pdf	American Tower Corp. (NYSE:AMT) F1Q09 Earnings Call Transcript April 29, 2009 8:30 AM ET	Michael Powell - Vice President of Investor Relations Analysts David Barden - BAS-ML Brett Feldman - Barclays Capital Jason Armstrong - Goldman Sachs https://seekingalpha.com/article/134267-american-tower-corp-q1-2009-earnings-call-transcript 1/30 12/4/21, 10:01 AM Jason Armstrong Goldman Sachs American Tower Corp. Q1 2009 Earnings Call Transcript _ Seeking Alpha Otto Bohman - Jefferies & Co. Jon…	0
761	20.pdf	Varian Semiconductor Equipment Associates, Inc. (NASDAQ:VSEA) F2Q09 (Qtr End 04/03/09) Earnings Call April 30, 2009 5:30 PM ET	Kate Kotlarsky - Goldman Sachs Peter Kim - Deutsche Bank Edwin Mok - Needham & Company Stephen Chin - UBS Weston Twigg - Pacific Crest Satya Kumar Credit Suisse https://seekingalpha.com/article/134462-varian-semiconductor-equipment-associates-inc-f2q09-qtr-end-04-03-09-earnings-call-transcript 1/28 12/4/21, 10:17 AM Varian Semiconductor Equipment Associates, Inc. F2Q09 (Qtr End 04/03/09) Earnings…	0
762	21.pdf	Zygo Corp. (NASDAQ:ZIGO) F3Q09 (Qtr End 31/03/09) Earnings Call April 30, 2009 6:00 PM ET	Welcome to the Zygo corporations third quarter results conference call. During the presentation all participants will be in a listen only mode. (Operator Instructions). This conference is being recorded for transcription Thursday, April 30, 2009. I would now like to turn the conference over to Mr. Walter Shephard, Chief Financial Officer for Zygo. Please go ahead, sir. Walter Shephard https://see…	0
763	22.pdf	PCTEL, Inc. (NASDAQ:PCTI) Q1 2009 Earnings Call April 30, 2009 5:30 PM ET	Matt Robison - Wedbush Morgan Securities Ken Muth - Robert W. Baird Mike Crawford Operator https://seekingalpha.com/article/134460-pctel-inc-q1-2009-earnings-call-transcript 1/18 12/4/21, 10:18 AM PCTEL, Inc. Q1 2009 Earnings Call Transcript | Seeking Alpha Ladies and Gentlemen, thank you for standing by, and welcome to the PCTEL First Quarter 2009 Conference Call. At this time, all participants …	0
764	23.pdf	Techwell, Inc. (TWLL) Q1 2009 Earnings Call Transcript April 30, 2009 5:15 PM ET	Rajvi Gill - Needham & Company Operator Welcome to the Techwell Incorporated first quarter 2009 Earnings Call. My name is Jeri and I will be your coordinator for today. At this time all participants are in a listen only mode. We will conduct a question-and-answer session towards the end of the conference. (Operator Instructions) https://seekingalpha.com/article/134459-techwell-inc-q1-2009-earning…	0
765	24.pdf	Rochester Medical Corporation (NASDAQ:ROCM) F2Q09 Earnings Call April 30, 2009 5:00 PM ET	David Butterworth – Townsend Group Operator Welcome to the Rochester Medical Corporation second quarter 2009 earnings conference call. (Operator Instructions) I would now like to turn the presentation over to your host for today’s call, Mr. Anthony Conway, CEO. Anthony J. Conway https://seekingalpha.com/article/134458-rochester-medical-corporation-f2q09-qtr-end-03-31-09-earnings-call-transcript 1…	1
766	25.pdf	Affiliated Computer Services, Inc. (ACS) F3Q09 Earnings Call April 30, 2009 4:30 PM ET	David Grossman Thomas Weisel Partners Moshe Katri Cowen & Company James Kissane Bank of America Jason Kupferberg UBS Ashwin Shirvaikar Citigroup https://seekingalpha.com/article/134457-affiliated-computer-services-inc-f3q09-qtr-end-3-31-09-earnings-call-transcript 1/28 12/4/21, 10:19 AM Affiliated Computer Services, Inc. F3Q09 (Qtr End 3/31/09) Earnings Call Transcript | Seeking Alpha Ashwin Shir…	1
767	26.pdf	Apache Corp. (NASDAQ:APA) Q1 2009 Earnings Call April 30, 2009 2:00 PM ET	Tom Chambers Good afternoon everyone and thanks for joining us today for Apache Corporation's first quarter 2009 earnings conference call. As you have probably seen this morning we reported first quarter net loss of $1.76 billion or $5.25 per diluted share. Loss was the result of the continuing deterioration in north American gas prices at the end of 2008 which recorded 1.98 billion non-cash afte…	1
768	27.pdf	Apache Corp. (NASDAQ:APA) Q1 2009 Earnings Call April 30, 2009 2:00 PM ET	Tom Chambers Good afternoon everyone and thanks for joining us today for Apache Corporation's first quarter 2009 earnings conference call. As you have probably seen this morning we reported first quarter net loss of $1.76 billion or $5.25 per diluted share. Loss was the result of the continuing deterioration in north American gas prices at the end of 2008 which recorded 1.98 billion non-cash afte…	1
769	28.pdf	InterMune, Inc. (NASDAQ:ITMN) Q1 2009 Earnings Call Transcript April 30, 2009 4:30 PM ET	Brian Abrahams – Oppenheimer & Co. Thomas Russo – Baird Jason Kolbert – ThinkEquity John [ph] – Leerink Swann Liisa Bayko – JMP Securities Matt Duffy – BDR Research Adam Cutler Canaccord https://seekingalpha.com/article/134455-intermune-inc-q1-2009-earnings-call-transcript 1/27 InterMune, Inc. Q1 2009 Earnings Call Transcript _ Seeking Alpha 12/4/21, 10:21 AM Adam Cutler – Canaccord Maged Shenoud…	1
770	29.pdf	Duke Realty Corporation (NYSE:DRE) Q1 2009 Earnings Call April 30, 2009 3:00 PM ET	Howard Feinsand - Executive Vice President & General Counsel Mark Denien - Corporate Controller Shona Bedwell - Investor Relations Randy Henry - Assistant Vice President of Investor Relations Analysts https://seekingalpha.com/article/134451-duke-realty-corporation-q1-2009-earnings-call-transcript 1/21 12/4/21, 10:21 AM Analysts Duke Realty Corporation Q1 2009 Earnings Call Transcript _ Seeking Al…	1
771	3.pdf	Central European Media Enterprises Ltd (CETV) Q1 2009 Earnings Call Transcript April 29, 2009 9:00 AM ET	Ben Mogil – Thomas Weisel Partners Laurie Hill – Goldman Sachs Matthew Walker – Nomura Mitch Resnick – Fortis Investment Thomas Samson – Musinec Andrzej Knigawka ING Hanning Lance [ph] – WestLB Mellon Asset Management https://seekingalpha.com/article/134262-central-european-media-enterprises-ltd-q1-2009-earnings-call-transcript 1/41 12/4/21, 10:04 AM Central European Media Enterprises Ltd Q1 2009…	1
[truncated: 245 more rows]
